# Supplementary material for: Trace element analyses of carbonates using portable and micro-X-ray fluorescence: performance and optimization of measurement parameters and strategies
Source: Royal Society of Chemistry journal article supplement (doi:10.1039/c6ja00361c), 2017-01-01
Supplement: c6ja00361c1.xlsx [file c6ja00361c1.xlsx]

## Sheet: Sheet1
element	compound	CRM393 certified value (ug/g)	CRM393 measured value (ug/g)	SD (N = 30) (ug/g)	Weighing factor		CRM512 standard value (ug/g)	CRM782 standard value (ug/g)
Si	SiO2	7025.77	7113.1	139.782	3.21		3794	1241.53
Al	Al2O3	1244.78	1243.27	33.5466	0.29		1091.5	550.688
Ti	TiO2	91.2293	136.696	41.7339	10.6		20.4	24.7857
Fe	Fe2O3	451.237	449.905	4.0097	1.57		301.556	3137.31
Mn	MnO	102.633	96.4335	2.14322	1.08		72.1111	630.176
Ca	CaCO3	987019	987136	465.983	1		306107	216825
Mg	MgCO3	3228.31	3183.25	432.582	0.88		215876	128382
K	K2O	212.868	n.d	n.d	1		65	215.846
S	SO3	65.8562	48.571	39.8237	1.4		35	158.9
Ba	BaO	63.1953	42.6639	7.29936	1.61		99	7.1
Sr	SrCO3	275.797	274.842	2.2775	0.93		236
Na	Na2O	166.303	48.7689	113.735	0.45		927
P	P2O5	53.2171	52.8886	2.44598	0.07		26	55.5
Cr	Cr2O3		69.2103	2.34906	1			5.66667
Ni	NiO		6.47857	1.60553	1			4.36364
Cu	Cu2O		10.1557	1.44204	1
Zn	ZnO		16.5367	1.02805	1			66.1429
Pb	PbO		56.7474	3.23295	1			26.6923
