# Supplementary material for: Trace element analyses of carbonates using portable and micro-X-ray fluorescence: performance and optimization of measurement parameters and strategies
Source: Royal Society of Chemistry journal article supplement (doi:10.1039/c6ja00361c), 2017-01-01
Supplement: c6ja00361c2.xlsx [file c6ja00361c2.xlsx]

## Sheet: CRM393
Overview table of repeatability tests on M4 and Tracer																																	POWER FUNCTION FIT
Espirit quantification "Linestone 393 Point2"																																	threshold value =	0.0001	RSD/s		2	SD
	12.0107	15.9994	35.453	79.904	102.906	22.9898	24.305	26.9815	28.0855	30.9738	32.065	39.0983	40.078	47.867	51.9961	54.938	55.845	58.6934	63.546	65.38	85.4678	87.62	137.327	207.2	6.941	10.811	50.9415	58.9332	39.948	112.411	200.59
mol%	Same-spot measurements
STDEV
Time (s)	C	O	Cl	Br	Rh	Na	Mg	Al	Si	P	S	K	Ca	Ti	Cr	Mn	Fe	Ni	Cu	Zn	Rb	Sr	Ba	Pb	Li7(LR)	B11(LR)	V51(MR)	Co59(MR)	As75(HR)	Cd114(LR)	Hg202(LR)
3	0.000176051	7.5294e-05	0	1.18556e-06	0	0	0.000177032	0.000122072	0.000587346	1.23935e-05	7.43617e-05	0	0.000534878	0.000155701	1.33397e-05	1.39372e-05	2.01529e-05	8.20652e-06	9.98733e-07	2.83478e-06	0	1.65376e-05	2.05805e-05	1.28934e-05	0	0	0	0	0	0	0
10	0.000101539	7.30376e-05	0	3.83059e-06	0	0	0.000176272	8.67467e-05	0.000353239	5.88462e-06	3.81677e-05	0	0.000478139	0.000135204	7.44163e-06	9.10653e-06	1.371e-05	3.56013e-06	3.15633e-06	3.97063e-06	0	6.74489e-06	1.92578e-05	1.44272e-05	0	0	0	0	0	0	0
30	4.9523e-05	9.37945e-05	0	3.45133e-06	0	5.79002e-05	0.000291296	5.85975e-05	0.000172382	4.4877e-06	2.41475e-05	0	0.000454318	6.72087e-05	4.45454e-06	4.92308e-06	7.69603e-06	1.63208e-06	3.19798e-06	2.73616e-06	0	4.34348e-06	1.33003e-05	7.23017e-06	0	0	0	0	0	0	0
60	4.2678e-05	8.14046e-05	0	2.20652e-06	0	0.000104686	0.000233969	2.91927e-05	0.00014168	3.1673e-06	2.22059e-05	0	0.0003954	4.81474e-05	3.74261e-06	3.66139e-06	6.13899e-06	1.38169e-06	3.17857e-06	1.69617e-06	0	2.87302e-06	1.06325e-05	6.77472e-06	0	0	0	0	0	0	0
120	3.13728e-05	7.21715e-05	0	1.47472e-06	0	3.5375e-06	0.000227837	3.07285e-05	9.49509e-05	1.43807e-06	1.52692e-05	0	0.000334498	4.18211e-05	2.93214e-06	2.60506e-06	4.81142e-06	6.31848e-07	1.86573e-06	1.44399e-06	0	2.40645e-06	9.3598e-06	4.13899e-06	0	0	0	0	0	0	0
300	2.78919e-05	4.26689e-05	0	9.6741e-07	0	8.43753e-05	0.0001247	1.77547e-05	6.534e-05	1.06747e-06	1.59492e-05	0	0.000186512	2.50101e-05	1.58592e-06	1.82322e-06	2.84047e-06	1.33887e-06	1.29228e-06	8.37494e-07	0	1.35168e-06	6.54478e-06	3.06112e-06	0	0	0	0	0	0	0
600	1.38265e-05	2.89491e-05	0	7.8686e-07	0	3.83413e-05	9.25857e-05	1.32678e-05	4.66501e-05	9.93346e-07	1.21766e-05	0	0.000153703	1.81633e-05	1.02315e-06	9.78382e-07	1.84641e-06	8.69106e-07	8.8029e-07	5.97017e-07	0	7.64277e-07	5.12151e-06	1.76543e-06	0	0	0	0	0	0	0
1800	1.90178e-05	3.01349e-05	0	4.47637e-07	0	9.57296e-05	5.59026e-05	7.66488e-06	4.67521e-05	5.82804e-07	6.46575e-06	0	0.000117163	1.17599e-05	2.16061e-06	9.8038e-07	2.00724e-06	6.25735e-07	5.95206e-07	4.17294e-07	0	1.00678e-06	2.91998e-06	3.44572e-06	0	0	0	0	0	0	0
MEAN
Time (s)																																		C	O	Cl	Br	Rh	Na	Mg	Al	Si	P	S	K	Ca	Ti	Cr	Mn
3	0.119177	0.479727	0	5.21494e-07	0	0	5.31284e-05	0.000333545	0.00250948	1.60361e-05	4.29401e-05	0	0.397535	0.000102238	3.93493e-05	6.39685e-05	0.000261054	3.66872e-06	2.99482e-07	8.78429e-07	0	0.000119981	7.60491e-06	6.49121e-06	0	0	0	0	0	0	0		lower limit	0.118902	0.479929	0	1.50389e-05	0	0	0.000914777	0.000651358	0.00318367	2.41884e-05	9.89837e-06	0	0.394884	5.28201e-05	3.89952e-05	7.68559e-05
10	0.119033	0.47974	0	2.67684e-06	0	0	7.34424e-05	0.000523453	0.00288525	1.33777e-05	1.70406e-05	0	0.397011	0.000136194	3.68751e-05	6.84739e-05	0.000280792	1.13154e-06	2.08173e-06	4.08137e-06	0	0.00014354	7.38576e-06	2.0407e-05	0	0	0	0	0	0	0		upper limit	0.118978	0.48005	0	1.68295e-05	0	0.000274686	0.00113839	0.000682018	0.00337068	2.65196e-05	3.57614e-05	0	0.395353	9.98595e-05	4.76376e-05	8.07774e-05
30	0.118993	0.479797	0	7.33731e-06	0	1.2786e-05	0.000281628	0.000576626	0.00303004	1.73628e-05	1.3362e-05	0	0.396529	0.000114717	4.27485e-05	7.2602e-05	0.000302861	4.65117e-07	2.39776e-06	7.94394e-06	0	0.000154017	6.79206e-06	3.66902e-05	0	0	0	0	0	0	0		col_out	3	5	0	6	0	0	5	5	4	7	1	0	5	4	7	7
60	0.118964	0.479869	0	1.00703e-05	0	3.31508e-05	0.000517363	0.00062062	0.0031596	1.88174e-05	1.20779e-05	0	0.39604	0.000102929	4.36383e-05	7.2439e-05	0.000307014	3.52942e-07	5.05319e-06	1.03202e-05	0	0.000158177	1.35985e-05	4.23873e-05	0	0	0	0	0	0	0		col_in	4	6	0	7	0	0	6	6	5	8	2	0	6	5	8	8
120	0.118972	0.479911	0	1.25927e-05	0	6.45855e-07	0.000637299	0.0006225	0.00318373	2.08899e-05	1.01243e-05	0	0.395869	8.65813e-05	4.43055e-05	7.32374e-05	0.000304085	1.59268e-07	5.23748e-06	1.13473e-05	0	0.000160364	2.65422e-05	4.86696e-05	0	0	0	0	0	0	0		dt/dc	-1.01302e+06	2.26093e+06	INF	3.10601e+08	INF	INF	642101	5.07008e+06	2.48643e+06	6.08715e+08	-270275	INF	-305974	-3.67035e+06	-2.4892e+08	3.55272e+08
300	0.118935	0.47999	0	1.46027e-05	0	3.61796e-05	0.000917628	0.000658002	0.00332491	2.30817e-05	1.94525e-05	0	0.395281	8.19284e-05	4.73814e-05	7.48358e-05	0.000315078	5.08954e-06	8.99062e-06	1.32914e-05	0	0.000163123	3.82112e-05	5.25884e-05	0	0	0	0	0	0	0		t confident	45.4039	161.894	0	435.49	0	0	298.169	266.316	119.857	1090.48	4.94023	0	277.859	71.2644	724.359	1103.4
600	0.118931	0.480002	0	1.55686e-05	0	1.46684e-05	0.000940173	0.000665595	0.0033431	2.33827e-05	2.66623e-05	0	0.395229	7.14961e-05	4.81372e-05	7.54389e-05	0.000317258	7.01411e-06	9.56084e-06	1.40489e-05	0	0.000164808	4.63761e-05	5.43022e-05	0	0	0	0	0	0	0
1800	0.11894	0.47999	0	1.59342e-05	0	8.32271e-05	0.00102658	0.000666688	0.00327718	2.5354e-05	2.28299e-05	0	0.395119	7.63398e-05	4.33164e-05	7.88166e-05	0.000314494	8.30982e-06	1.04048e-05	1.59033e-05	0	0.000163668	5.18864e-05	7.0843e-05	0	0	0	0	0	0	0
Coefficient of variation (RSD)
Time (s)	C	O	Cl	Br	Rh	Na	Mg	Al	Si	P	S	K	Ca	Ti	Cr	Mn	Fe	Ni	Cu	Zn	Rb	Sr	Ba	Pb										C	O	Cl	Br	Rh	Na	Mg	Al	Si	P	S	K	Ca	Ti	Cr	Mn
3	0.00147722	0.000156952	0	2.27339	0	0	3.33215	0.365983	0.234051	0.772847	1.73175	0	0.00134549	1.52292	0.339006	0.217877	0.0771981	2.23689	3.33487	3.2271	0	0.137835	2.70621	1.98629									a (exponent)	-0.379153	-0.177967		-0.739061		-0.304679	-0.696983	-0.533776	-0.46852	-0.578204	-0.309935		-0.25697	-0.342733	-0.387011	-0.480341
10	0.000853032	0.000152244	0	1.43101	0	0	2.40014	0.16572	0.122429	0.439884	2.23981	0	0.00120435	0.992731	0.201807	0.132993	0.0488261	3.14628	1.5162	0.972867	0	0.0469897	2.60743	0.706974									b (constant in RSD)	0.00185377	0.000260773		5.45039		14.4433	9.08891	0.583027	0.326362	1.54966	4.29413		0.00228288	2.13179	0.432382	0.365421
30	0.000416183	0.000195488	0	0.470381	0	4.5284	1.03433	0.101621	0.056891	0.258467	1.80719	0	0.00114574	0.585864	0.104203	0.0678092	0.0254111	3.50897	1.33374	0.344433	0	0.0282012	1.95821	0.19706									Rsquared	0.920706	0.662773		0.978526		0.701567	0.982856	0.98419	0.961195	0.976824	0.759804		0.895553	0.983375	0.823105	0.982214
60	0.000358748	0.000169639	0	0.219111	0	3.15788	0.452233	0.0470379	0.0448411	0.168318	1.83855	0	0.000998384	0.467775	0.0857643	0.0505445	0.0199958	3.91479	0.629023	0.164353	0	0.0181633	0.78189	0.159829									a-1 (exponent of derivative)	-1.37915	-1.17797		-1.73906		-1.30468	-1.69698	-1.53378	-1.46852	-1.5782	-1.30994		-1.25697	-1.34273	-1.38701	-1.48034
120	0.000263698	0.000150385	0	0.117109	0	5.47723	0.357505	0.0493631	0.0298238	0.0688403	1.50818	0	0.000844972	0.483027	0.06618	0.0355701	0.0158226	3.96721	0.356227	0.127254	0	0.0150061	0.352638	0.0850425									ab (constant of derivative in RSD/sec)	-0.000702862	-4.64089e-05		-4.02817		-4.40055	-6.33481	-0.311206	-0.152907	-0.896019	-1.3309		-0.000586632	-0.730635	-0.167336	-0.175526
300	0.000234515	8.88953e-05	0	0.0662487	0	2.33213	0.135893	0.0269827	0.0196517	0.0462474	0.819907	0	0.000471847	0.305267	0.0334713	0.0243629	0.00901512	0.263064	0.143737	0.0630101	0	0.00828626	0.171279	0.058209									t_minimal (time threshold is reached in sec)	4.11198	0.52116		444.675		3623.43	675.416	189.416	147.388	319.384	1407.21		4.08587	754.205	210.925	155.46
600	0.000116257	6.03104e-05	0	0.0505416	0	2.61388	0.0984773	0.0199338	0.0139542	0.0424822	0.456699	0	0.000388895	0.254046	0.0212549	0.0129692	0.0058199	0.123908	0.0920725	0.0424956	0	0.00463737	0.110434	0.0325112									RSD at t_minimal	0.00108452	0.000292841		0.0601676		1.18926	0.0969056	0.0354861	0.0314581	0.0552373	0.454034		0.00159002	0.220056	0.054501	0.0323645
1800	0.000159894	6.27824e-05	0	0.0280929	0	1.15022	0.0544551	0.0114969	0.014266	0.0229866	0.283215	0	0.000296526	0.154046	0.0498798	0.0124388	0.00638245	0.0753007	0.0572047	0.0262395	0	0.00615139	0.0562765	0.0486389
mol%	Different spot measurements
STDEV
Time (s)	C	O	Cl	Br	Rh	Na	Mg	Al	Si	P	S	K	Ca	Ti	Cr	Mn	Fe	Ni	Cu	Zn	Rb	Sr	Ba	Pb
3	0.00342936	0.00129895	0	4.97741e-06	0	0.000401101	0	0.000264634	0.0124945	9.74383e-06	0.000114181	0.000112071	0.0114437	0.000738058	5.68248e-06	3.97421e-05	0.000142352	3.27536e-06	1.38288e-06	1.56034e-05	0	1.33314e-05	2.17404e-05	3.04545e-06	0	0	0	0	0	0	0
10	0.0034027	0.0012621	1.01476e-05	6.42772e-06	0	0.000116912	8.89008e-05	0.000226026	0.0124535	7.00805e-06	0.00020613	0.000133329	0.0113451	0.000677173	6.16307e-06	3.53918e-05	0.000128717	1.37401e-06	3.42539e-06	1.62903e-05	0	1.01323e-05	3.52706e-05	9.52938e-06	0	0	0	0	0	0	0
30	0.0034979	0.00129786	2.54345e-06	7.73668e-06	0	2.02007e-06	0.00027982	0.00023071	0.0127926	6.4462e-06	0.000166414	0.000136534	0.0116834	0.000709063	5.75208e-06	3.41191e-05	0.000128885	3.38346e-06	5.61831e-06	1.52275e-05	0	6.81461e-06	3.54805e-05	1.10496e-05	0	0	0	0	0	0	0
60	0.00376752	0.00138752	0	8.73503e-06	0	0.000121866	0.00025019	0.000254612	0.0137291	6.283e-06	0.000191763	0.000156628	0.0125315	0.000771232	4.54884e-06	3.51132e-05	0.000141447	2.77899e-06	4.7011e-06	1.49069e-05	0	7.9523e-06	3.60895e-05	1.414e-05	0	0	0	0	0	0	0
120	0.0037634	0.00137613	0	7.87564e-06	0	0.00023913	0.000259746	0.000247631	0.0137351	5.32614e-06	0.000190062	0.000163907	0.0124581	0.000742036	6.284e-06	3.57512e-05	0.000137554	2.84249e-06	4.22145e-06	1.49584e-05	0	6.71326e-06	3.69346e-05	1.44688e-05	0	0	0	0	0	0	0
300	0.00410349	0.00151289	0	7.41723e-06	0	0.000222184	0.000160271	0.000261141	0.0150173	4.68092e-06	0.000173402	0.000183477	0.0136168	0.000794455	5.78392e-06	3.57093e-05	0.000147888	4.36173e-06	3.78861e-06	1.57962e-05	0	6.13433e-06	3.34704e-05	1.50162e-05	0	0	0	0	0	0	0
600	0.00375422	0.00138046	0	7.72644e-06	0	0.000157162	0.000167781	0.000241969	0.0137299	5.11797e-06	0.000218266	0.000162811	0.0124285	0.000725918	6.41901e-06	3.54546e-05	0.000136054	4.50153e-06	3.72457e-06	1.47143e-05	0	6.66761e-06	3.89461e-05	1.42642e-05	0	0	0	0	0	0	0
1800	0.00395457	0.00145983	0	7.44989e-06	0	0.000206543	0.000145277	0.000251936	0.0144639	4.81787e-06	0.000217092	0.000172796	0.0131099	0.000780074	5.96544e-06	3.73291e-05	0.000149499	5.5456e-06	3.68676e-06	1.54206e-05	1.44702e-07	6.73262e-06	4.00895e-05	1.50135e-05	0	0	0	0	0	0	0
MEAN
Time (s)																																		C	O	Cl	Br	Rh	Na	Mg	Al	Si	P	S	K	Ca	Ti	Cr	Mn
3	0.118585	0.479903	0	3.66081e-06	0	7.32307e-05	0	0.000254022	0.00458904	7.78473e-06	9.01367e-05	2.13509e-05	0.395652	0.000362913	2.76336e-06	9.80039e-05	0.000219982	1.33787e-06	5.09578e-07	1.56754e-05	0	0.000109604	8.62515e-06	8.1986e-07	0	0	0	0	0	0	0		lower limit	0.110247	0.477298	0	9.20032e-06	0	-0.00023981	0.000523241	1.25101e-05	-0.0229339	9.24131e-06	-0.000282728	-0.00029983	0.366639	-0.00117882	-6.31481e-06	3.67002e-05
10	0.118469	0.479944	1.85269e-06	1.01638e-05	0	3.96607e-05	2.43677e-05	0.000378965	0.00496352	8.00576e-06	9.20861e-05	2.89868e-05	0.395214	0.000313963	3.59972e-06	9.95766e-05	0.000229434	4.80945e-07	1.58607e-06	2.26767e-05	0	0.000133493	1.5268e-05	5.18961e-06	0	0	0	0	0	0	0		upper limit	0.126065	0.483138	0	3.89999e-05	0	0.00058636	0.00110435	0.00102026	0.0349217	2.85128e-05	0.000585642	0.000391352	0.419078	0.00194147	1.75469e-05	0.000186017
30	0.118406	0.480023	4.64368e-07	1.54521e-05	0	3.68813e-07	0.000220998	0.000441164	0.00517814	1.2797e-05	0.000102311	3.43225e-05	0.394672	0.000332308	3.37392e-06	0.000105262	0.000245313	1.47152e-06	5.09076e-06	2.8289e-05	0	0.000145234	1.65233e-05	1.04895e-05	0	0	0	0	0	0	0		col_out	0	0	3	1	0	0	5	0	0	2	0	0	0	0	0	0
60	0.118324	0.480092	0	1.82868e-05	0	2.98742e-05	0.000394111	0.00046396	0.00544667	1.53188e-05	0.000120375	3.58229e-05	0.394111	0.000368448	3.59253e-06	0.000107195	0.000255299	9.04586e-07	4.59424e-06	2.93135e-05	0	0.000149776	1.57443e-05	1.38663e-05	0	0	0	0	0	0	0		col_in	0	0	0	2	0	0	6	0	0	3	0	0	0	0	0	0
120	0.118302	0.480101	0	1.97817e-05	0	9.39794e-05	0.000490926	0.00047923	0.00549732	1.65318e-05	0.000123831	4.02149e-05	0.39388	0.000355684	4.37285e-06	0.000109107	0.000253288	1.32934e-06	5.87884e-06	3.21499e-05	0	0.000151721	2.0536e-05	2.09591e-05	0	0	0	0	0	0	0		dt/dc	INF	INF	-1.93812e+08	1.07643e+06	INF	INF	974381	INF	INF	4.1743e+06	INF	INF	INF	INF	INF	INF
300	0.118188	0.480191	0	2.18353e-05	0	0.000122198	0.000675659	0.00050554	0.00592735	1.74853e-05	0.000131851	4.43767e-05	0.393192	0.000366036	5.3368e-06	0.000110086	0.000260488	2.31306e-06	7.15582e-06	3.35996e-05	0	0.000151119	2.1349e-05	2.59119e-05	0	0	0	0	0	0	0		t confident	0	0	120	8.96291	0	0	151.487	0	0	15.1576	0	0	0	0	0	0
600	0.118292	0.48018	0	2.35543e-05	0	0.000104549	0.000760513	0.000507624	0.00553465	1.85596e-05	0.000148917	4.11359e-05	0.393398	0.000360371	5.43321e-06	0.000110717	0.000260657	2.30891e-06	7.37653e-06	3.37331e-05	0	0.000155041	2.50776e-05	2.90927e-05	0	0	0	0	0	0	0
1800	0.118156	0.480218	0	2.41001e-05	0	0.000173275	0.000813796	0.000516383	0.00599391	1.8877e-05	0.000151457	4.57612e-05	0.392858	0.000381323	5.61606e-06	0.000111358	0.00026972	4.37752e-06	8.51612e-06	3.58331e-05	2.73461e-08	0.000154254	2.71524e-05	3.15418e-05	0	0	0	0	0	0	0
Coefficient of variation (RSD)
Time (s)	C	O	Cl	Br	Rh	Na	Mg	Al	Si	P	S	K	Ca	Ti	Cr	Mn	Fe	Ni	Cu	Zn	Rb	Sr	Ba	Pb										C	O	Cl	Br	Rh	Na	Mg	Al	Si	P	S	K	Ca	Ti	Cr	Mn
3	0.0289189	0.0027067	#DIV/0!	1.35965	#DIV/0!	5.47723	#DIV/0!	1.04178	2.72269	1.25166	1.26676	5.24903	0.0289236	2.0337	2.05636	0.405516	0.647104	2.44819	2.71378	0.995405	#DIV/0!	0.121632	2.52059	3.71459									a (exponent)	0.0273707	0.0231806		-0.2107		-0.382162		-0.0941014	-0.0122069	-0.263929	-0.0230253	-0.0429358	0.0265954	-0.00278205	-0.106099	-0.0268672
10	0.0287222	0.00262968	5.47723	0.632415	#DIV/0!	2.9478	3.64831	0.596429	2.509	0.875376	2.23845	4.59964	0.0287064	2.15686	1.7121	0.355423	0.561018	2.8569	2.15966	0.718369	#DIV/0!	0.075901	2.31009	1.83624									b (constant in RSD)	0.0277237	0.00257577		1.21571		18.1882		0.862469	2.65644	1.40523	1.70136	5.13182	0.0277648	2.11688	2.23713	0.381692
30	0.0295416	0.00270374	5.47723	0.500687	#DIV/0!	5.47723	1.26617	0.522958	2.4705	0.503728	1.62655	3.97796	0.0296027	2.13375	1.70487	0.324136	0.525389	2.29929	1.10363	0.538281	#DIV/0!	0.0469217	2.1473	1.0534									Rsquared	0.722565	0.646887		0.85324		0.959696		0.625839	0.550123	0.905011	0.0785617	0.756013	0.713128	0.0454787	0.876562	0.521896
60	0.0318408	0.00289012	#DIV/0!	0.477667	#DIV/0!	4.07931	0.634821	0.54878	2.52065	0.41015	1.59305	4.37229	0.031797	2.09319	1.26619	0.327563	0.554044	3.07211	1.02326	0.508532	#DIV/0!	0.0530948	2.29223	1.01974									a-1 (exponent of derivative)	-0.972629	-0.976819		-1.2107		-1.38216		-1.0941	-1.01221	-1.26393	-1.02303	-1.04294	-0.973405	-1.00278	-1.1061	-1.02687
120	0.0318116	0.00286633	#DIV/0!	0.398128	#DIV/0!	2.5445	0.529094	0.516726	2.49851	0.322176	1.53485	4.07577	0.0316292	2.08622	1.43705	0.327671	0.543073	2.13827	0.718076	0.465269	#DIV/0!	0.0442473	1.79853	0.690333									ab (constant of derivative in RSD/sec)	0.000758817	5.97079e-05		-0.25615		-6.95082		-0.0811595	-0.0324269	-0.37088	-0.0391743	-0.220339	0.000738415	-0.00588929	-0.237358	-0.010255
300	0.0347201	0.0031506	#DIV/0!	0.339689	#DIV/0!	1.81823	0.237207	0.516558	2.53355	0.267707	1.31513	4.13454	0.0346313	2.17043	1.08378	0.324375	0.567732	1.8857	0.529445	0.470132	#DIV/0!	0.0405928	1.56778	0.57951									t_minimal (time threshold is reached in sec)	8.0335	0.589816		653.595		3185.91		456.156	302.43	666.683	342.484	1604.95	7.79874	58.2307	1126.23	90.8493
600	0.0317369	0.00287488	#DIV/0!	0.328027	#DIV/0!	1.50324	0.220616	0.476669	2.48072	0.275759	1.46569	3.95787	0.0315926	2.01436	1.18144	0.320228	0.521963	1.94964	0.504922	0.436198	#DIV/0!	0.0430055	1.55302	0.490303									RSD at t_minimal	0.0293508	0.00254444		0.310201		0.833654		0.484749	2.47753	0.2526	1.48742	3.73803	0.0293236	2.09308	1.06149	0.338142
1800	0.033469	0.00303993	#DIV/0!	0.309123	#DIV/0!	1.19199	0.178518	0.487887	2.4131	0.255224	1.43336	3.77603	0.0333705	2.0457	1.06221	0.335216	0.554277	1.26684	0.432916	0.430346	5.2915	0.0436462	1.47646	0.475987
pXRF quantification Carbonate Standard
mol% pXRF spot
STDEV
Time (s)	C	O	Cl	Br	Rh	Na	Mg	Al	Si	P	S	K	Ca	Ti	Cr	Mn	Fe	Ni	Cu	Zn	Rb	Sr	Ba	Pb
3	0	0	0	0	0	0	0	0	0	0	0	0.00243784	0.174394	0.000215319	1.98249e-05	3.52859e-06	0.000270321	5.19756e-21	9.26398e-06	1.03951e-20	0	1.1327e-05	0	0	0	0	0	0	0	0	0
10	0	0	0	0	0	0	0	0	0	0	0	0.00103858	0.0658764	0.000128329	3.73531e-06	7.73826e-05	0.000102545	1.43343e-05	1.51682e-05	5.69262e-07	0	7.25049e-06	0	0	0	0	0	0	0	0	0
30	0	0	0	0	0	0	0	0	0	0	0	0.000925872	0.0408801	2.53823e-05	2.79857e-06	5.28999e-05	7.68815e-05	5.49515e-06	6.31937e-06	9.10264e-21	0	5.94051e-06	0	0	0	0	0	0	0	0	0
45	0	0	0	0	0	0	0	0	0	0	0	0.000917611	0.0627386	2.46271e-05	4.29785e-06	3.86289e-05	8.6603e-05	4.26162e-06	4.52051e-06	9.31948e-21	0	5.03323e-06	0	0	0	0	0	0	0	0	0
60	0	0	0	0	0	0	0	0	0	0	0	0.000479918	0.029332	3.04632e-05	1.76757e-06	3.22273e-05	5.78412e-05	3.32184e-06	3.59573e-06	1.69706e-06	0	4.15298e-06	0	0	0	0	0	0	0	0	0
90	0	0	0	0	0	0	0	0	0	0	0	0.000702362	0.0582884	1.32292e-05	8.90903e-07	2.62849e-05	7.75619e-05	3.5836e-06	2.10659e-06	2.92781e-06	0	3.56262e-06	0	0	0	0	0	0	0	0	0
120	0	0	0	0	0	0	0	0	0	0	0	0.000799332	0.0523776	0.00012941	3.14903e-05	2.20836e-05	0.000105302	3.32079e-06	2.93568e-06	2.51385e-06	0	3.81811e-06	0	0	0	0	0	0	0	0	0
300
600
1800
MEAN
Time (s)																																		C	O	Cl	Br	Rh	Na	Mg	Al	Si	P	S	K	Ca	Ti	Cr	Mn
3	0	0	0	0	0	0	0	0	0	0	0	0.0110919	0.987281	0.000270014	2.47646e-05	9.87678e-06	0.00104672	1.27817e-05	1.45791e-05	3.03566e-05	0	0.000218195	0	0	0	0	0	0	0	0	0		lower limit	0	0	0	0	0	0	0	0	0	0	0	0	0	0	0	0
10	0	0	0	0	0	0	0	0	0	0	0	0.0107108	0.98779	0.000178727	4.74329e-06	3.73929e-05	0.00101198	2.05859e-05	2.55189e-05	2.73213e-05	0	0.000193052	0	0	0	0	0	0	0	0	0		upper limit	0	0	0	0	0	0	0	0	0	0	0	0.011982	1.09262	0.000418652	0.000143396	0.000219267
30	0	0	0	0	0	0	0	0	0	0	0	0.0104543	0.988014	7.19183e-05	5.59676e-06	0.000153911	0.00100289	4.01101e-05	2.90099e-05	2.65846e-05	0	0.000201623	0	0	0	0	0	0	0	0	0		col_out	0	0	0	0	0	0	0	0	0	0	0	0	0	0	0	0
45	0	0	0	0	0	0	0	0	0	0	0	0.0105115	0.98798	5.98486e-05	5.73019e-06	0.000143459	0.000999344	4.03023e-05	2.99402e-05	2.72184e-05	0	0.000202992	0	0	0	0	0	0	0	0	0		col_in	0	0	0	0	0	0	0	0	0	0	0	0	0	0	0	0
60	0	0	0	0	0	0	0	0	0	0	0	0.0101271	0.988313	5.25541e-05	2.38109e-06	0.000172845	0.00103693	4.24515e-05	2.78928e-05	2.63054e-05	0	0.000198833	0	0	0	0	0	0	0	0	0		dt/dc	INF	INF	INF	INF	INF	INF	INF	INF	INF	INF	INF	INF	INF	INF	INF	INF
90	0	0	0	0	0	0	0	0	0	0	0	0.0104898	0.988005	2.70876e-05	2.51978e-06	0.000166767	0.00102962	4.14504e-05	2.61217e-05	2.64577e-05	0	0.00018512	0	0	0	0	0	0	0	0	0		t confident	0	0	0	0	0	0	0	0	0	0	0	0	0	0	0	0
120	0	0	0	0	0	0	0	0	0	0	0	0.0103833	0.987866	0.000159832	8.04156e-05	0.0001751	0.00103381	4.30369e-05	2.85529e-05	2.99367e-05	0	0.000199686	0	0	0	0	0	0	0	0	0
300
600
1800
Coefficient of variation (RSD)
Time (s)	C	O	Cl	Br	Rh	Na	Mg	Al	Si	P	S	K	Ca	Ti	Cr	Mn	Fe	Ni	Cu	Zn	Rb	Sr	Ba	Pb										C	O	Cl	Br	Rh	Na	Mg	Al	Si	P	S	K	Ca	Ti	Cr	Mn
3												0.219786	0.176641	0.797437	0.800534	0.357261	0.258256	4.0664e-16	0.635427	3.42434e-16		0.0519126											a (exponent)												-0.304711	-0.316994	-0.0807353	-0.184235	-0.46797
10												0.0969654	0.0666907	0.718017	0.787494	2.06945	0.101331	0.696316	0.594389	0.0208358		0.0375572											b (constant in RSD)												0.249503	0.178483	0.748983	1.10559	1.52353
30												0.0885639	0.041376	0.352932	0.500034	0.343705	0.0766598	0.137002	0.217835	3.42403e-16		0.0294634											Rsquared												0.721317	0.564537	0.103182	0.468664	0.434625
45												0.0872955	0.0635019	0.41149	0.750037	0.269268	0.0866598	0.105741	0.150984	3.42397e-16		0.0247952											a-1 (exponent of derivative)												-1.30471	-1.31699	-1.08074	-1.18423	-1.46797
60												0.0473893	0.0296788	0.579654	0.742336	0.186452	0.0557811	0.0782502	0.128912	0.0645138		0.0208868											ab (constant of derivative in RSD/sec)												-0.0760263	-0.0565782	-0.0604693	-0.203688	-0.712965
90												0.0669564	0.0589961	0.488387	0.353564	0.157614	0.0753304	0.0864553	0.0806451	0.11066		0.019245											t_minimal (time threshold is reached in sec)												161.482	123.055	374.751	622.559	421.463
120												0.0769825	0.0530209	0.809664	0.391594	0.12612	0.101859	0.0771614	0.102815	0.0839722		0.0191206											RSD at t_minimal												0.052995	0.0388193	0.464173	0.337917	0.0900619
300
600
1800
mol%	Maps
																																		C	O	Cl	Br	Rh	Na	Mg	Al	Si	P	S	K	Ca	Ti	Cr	Mn
STDEV																																	lower limit	0.116803	0.480383	0	3.74797e-05	0	0	0.00106604	0.000928374	0.00974853	3.96664e-05	9.57038e-05	0	0.387044	0.000687036	1.06506e-06	0.000186918
Time (s)	C	O	Cl	Br	Rh	Na	Mg	Al	Si	P	S	K	Ca	Ti	Cr	Mn	Fe	Ni	Cu	Zn	Rb	Sr	Ba	Pb									upper limit	0.116965	0.480758	0	4.25063e-05	0	0.000568656	0.00168055	0.00100413	0.0102054	4.6124e-05	0.000173722	0	0.388198	0.000818593	5.10137e-06	0.000195227
300	0.000472418	0.00235343	0	4.19425e-06	0	0.000210873	0.000482832	4.43187e-05	0.000191505	3.71286e-06	4.06131e-05	0	0.000778495	8.69786e-05	3.97094e-06	7.04996e-06	6.1545e-06	0	6.71238e-06	2.87246e-06	0	3.77374e-06	1.75237e-05	8.52194e-06	0	0	0	0	0	0	0		col_out	2	0	0	2	0	0	1	2	2	1	2	0	0	2	0	2
600	0.00025253	0.00123118	0	2.2222e-06	0	0	0.000254388	2.90129e-05	0.000128635	2.0177e-06	1.2981e-05	0	0.000421994	2.93848e-05	2.49198e-06	3.39449e-06	7.61817e-06	0	2.049e-06	1.8658e-06	0	2.59463e-06	1.21079e-05	5.15922e-06	0	0	0	0	0	0	0		col_in	3	0	0	3	0	0	2	3	3	2	3	0	0	3	0	3
1800	4.05534e-05	9.39387e-05	0	1.25664e-06	0	0.000195957	0.000153628	1.89391e-05	0.000114217	1.6144e-06	1.95044e-05	0	0.000288691	3.28893e-05	1.00908e-06	2.07714e-06	5.00253e-06	6.37043e-07	1.06839e-06	1.12591e-06	0	1.98527e-06	5.3682e-06	4.00582e-06	0	0	0	0	0	0	0		dt/dc	4.57291e+06	INF	INF	2.26169e+08	INF	INF	2.51381e+06	-1.98413e+07	-1.20963e+06	8.62716e+07	9.63017e+06	INF	INF	-5.8457e+06	INF	8.78871e+07
																																	t confident	1429.11	0	0	1231.58	0	0	442.855	1048.45	1523.68	522.957	1424.34	0	0	1415.48	0	1434.89
MEAN
300	0.116652	0.480538	0	2.87135e-05	0	9.66226e-05	0.00100921	0.000959383	0.0108209	3.7082e-05	3.55263e-05	0	0.387445	0.000954681	4.83004e-06	0.000175638	0.000772426	0	9.8926e-06	3.21436e-05	0	0.000312982	7.88078e-05	3.57631e-05	0	0	0	0	0	0	0			C	O	Cl	Br	Rh	Na	Mg	Al	Si	P	S	K	Ca	Ti	Cr	Mn
600	0.116621	0.480585	0	3.46873e-05	0	0	0.00112855	0.00102673	0.010969	4.05594e-05	1.01042e-05	0	0.387141	0.000958094	2.7829e-06	0.000177419	0.000778495	0	1.07079e-05	3.63406e-05	0	0.000320245	0.000106276	5.29942e-05	0	0	0	0	0	0	0		a (exponent)	-1.39827	-1.84722		-0.838578			-0.795272	-0.465242	-0.223005	-0.519523	-1.22907		-0.535057	-0.343593	-0.550637	-0.709529
1800	0.116884	0.48057	0	3.9993e-05	0	0.000176742	0.0013733	0.000966252	0.00997696	4.28952e-05	0.000134713	0	0.387621	0.000752815	3.08322e-06	0.000191072	0.000791183	2.13586e-07	1.33934e-05	4.87321e-05	0	0.000303018	5.63777e-05	5.41779e-05	0	0	0	0	0	0	0		b (constant in RSD)	13.4202	234.502		15.9119			41.3584	0.615394	0.0572679	1.70391	1830.53		0.0387892	0.468022	22.701	2.08944
																																	Rsquared	0.978832	0.959612		0.970737			0.977503	0.954743	0.677149	0.867126	0.817633		0.932245	0.312427	0.794651	0.9576
Coefficient of variation (RSD)																																	a-1 (exponent of derivative)	-2.39827	-2.84722		-1.83858			-1.79527	-1.46524	-1.223	-1.51952	-2.22907		-1.53506	-1.34359	-1.55064	-1.70953
300	0.00404979	0.0048975	0	0.146073	0	2.18244	0.478424	0.046195	0.0176978	0.100126	1.14318	0	0.0020093	0.0911075	0.822133	0.0401391	0.00796775	0	0.678525	0.0893634	0	0.0120573	0.222361	0.238288									ab (constant of derivative in RSD/sec)	-18.765	-433.175		-13.3434			-32.8912	-0.286307	-0.012771	-0.885219	-2249.85		-0.0207544	-0.160809	-12.5	-1.48252
600	0.00216539	0.00256184	0	0.0640638	0	0	0.225411	0.0282575	0.0117271	0.0497468	1.28471	0	0.00109003	0.03067	0.89546	0.0191326	0.00978576	0	0.191354	0.051342	0	0.008102	0.113929	0.0973545									t_minimal (time threshold is reached in sec)	158.057	214.255		613.231			1183.36	228.677	52.7439	395.876	1987.47		32.3194	243.428	1936.32	275.33
1800	0.000346955	0.000195473	0	0.0314214	0	1.10872	0.111868	0.0196006	0.0114481	0.0376358	0.144785	0	0.000744776	0.0436884	0.327281	0.010871	0.00632285	2.9826	0.0797695	0.0231042	0	0.00655168	0.0952185	0.0739383									RSD at t_minimal	0.0113038	0.0115988		0.0731275			0.148799	0.0491523	0.0236515	0.0761998	0.161705		0.00604036	0.0708477	0.351651	0.0388046
ARTAX deconvolution				Same spot measurements
MEAN RSD's (ARTAX)
Time (s)	C	O	Cl	Br	Rh	Na	Mg	Al	Si	P	S	K	Ca	Ti	Cr	Mn	Fe	Ni	Cu	Zn	Rb	Sr	Ba	Pb									LLD	C	O	Cl	Br	Rh	Na	Mg	Al	Si	P	S	K	Ca	Ti	Cr	Mn
3	0	0	9.22222	0.365015	0.0291354	19.0185	2.20575	0.283113	0.169983	0.146935	2.64665	6.79453	0.00151383	0.877323	0.357789	0.168116	0.0942356	0.020646	0.320871	0.694218	21.7605	0.108973	0.630643	0.443652									t before	1	1	1	1	2	1	3	-INF	-INF	-INF	3	2	-INF	6	1	-INF
10	0	0	10.3292	0.190159	5.38131	35.7667	0.791913	0.148192	0.0969837	0.104739	5.90147	0.622045	0.000829242	1.3629	0.190843	0.0870148	0.0505386	0.0112946	0.16357	0.342261	35.7565	0.058476	2.34731	0.185361									t after	1	1	INF	2	1	INF	4	1	1	1	4	3	1	INF	2	1
30	0	0	13.9667	0.107838	0.00857253	54.6143	0.454107	0.0866701	0.0567358	0.057013	1.37033	0.257909	0.000478479	6.56359	0.0981641	0.0470777	0.0277897	0.0064618	0.0858589	0.177901	49.242	0.0337071	3.56392	0.101848									D	0	0	0	-0.174856	-5.35218	0	-0.136132	0	0	0	-1.16203	-0.364136	0	0	-0.166947	0
60	0	0	19.6667	0.072135	0.00604935	83.759	0.317974	0.0587025	0.0384778	0.0392009	0.208308	0.15383	0.000338315	5.9824	0.0697879	0.0336712	0.0194197	0.0045479	0.056631	0.119151	13.4681	0.0235136	8.10111	0.0709766									Dt	0	0	0	7	-7	0	30	0	0	0	30	20	0	0	7	0
120	0	0	34.9667	0.0496247	0.0042319	120.262	0.228768	0.0428074	0.0274854	0.0279309	0.142024	0.104109	0.000239224	10.7742	0.0489142	0.0232005	0.0136065	0.00321656	0.0399753	0.0834655	1.36935	0.0167323	20.1355	0.0488172									t LLD	0	0	INF	4.40174	3.39349	INF	57.3498	0	0	0	56.8583	26.0404	0	INF	4.1652	0
300	0	0	254.2	0.0298462	0.00266247	170.3	0.123351	0.0257599	0.0167634	0.0170344	0.0838167	0.0633655	0.000151301	0.74595	0.0291576	0.0144874	0.00848149	0.00203041	0.0242563	0.0499881	11.9368	0.0104947	56.3672	0.0290694
600	0	0	452.733	0.0202893	0.00187591	258.907	0.0939719	0.0182142	0.0118716	0.012033	0.0560655	0.0436295	0.000107021	3.90888	0.0203731	0.0101266	0.00595308	0.00143343	0.0169638	0.0350609	1.547	0.00737395	81.9343	0.0199276									LLQ
1800	0	0	810.033	0.012049	0.00108235	272.417	0.052368	0.010564	0.00693302	0.00681237	0.0345459	0.0245344	6.1742e-05	39.5014	0.0131227	0.00570262	0.00349719	0.00082644	0.00963872	0.0188845	0	0.00431463	160.824	0.0102574									t before	1	1	1	3	2	1	6	2	1	2	5	5	-INF	6	2	1
																																	t after	1	1	INF	4	1	INF	7	3	2	3	6	6	1	INF	3	2
MEAN signal/noise (ARTAX)																																	D	0	0	0	-0.0357031	-5.35218	0	-0.0293792	-0.0615218	-0.0729992	-0.0477265	-0.0582075	-0.0407435	0	0	-0.0926786	-0.0811009
Time (s)	C	O	Cl	Br	Rh	Na	Mg	Al	Si	P	S	K	Ca	Ti	Cr	Mn	Fe	Ni	Cu	Zn	Rb	Sr	Ba	Pb									Dt	0	0	0	30	-7	0	300	20	7	20	180	180	0	0	20	7
3	0	0	0.999654	1.07632	2.83246	1.00715	1.14479	1.4186	1.73557	1.75841	1.14891	1.0424	180.963	1.02937	1.29453	1.5219	1.75007	4.11352	1.13377	1.05798	1	1.26932	1.83713	1.0908									t LLQ	0	0	INF	36.5861	3.09268	INF	538.445	25.6666	9.71076	11.9861	249.955	138.153	0	INF	29.6038	8.87922
10	0	0	1.00014	1.07304	2.93555	1.00157	1.09359	1.41138	1.57388	1.47407	1.07724	1.04646	184.645	1.01911	1.28278	1.53958	1.76128	4.11814	1.14109	1.06475	1.00194	1.26913	1.14012	1.0878
30	0	0	1.00002	1.07353	3.08624	1.00166	1.0791	1.3936	1.55769	1.492	1.07427	1.05604	186.96	1.00766	1.31651	1.58334	1.81468	4.18296	1.15414	1.06494	1.00005	1.26856	1.04866	1.08932
60	0	0	1.00001	1.07747	3.09254	1.0005	1.07932	1.41168	1.58936	1.50573	1.07996	1.06555	187.97	1.0073	1.3136	1.57401	1.82841	4.22394	1.16523	1.06825	1.00025	1.27268	1.02004	1.08951
120	0	0	1.00001	1.07943	3.13651	1.00032	1.07443	1.39794	1.58098	1.4982	1.07956	1.06792	188.633	1.00206	1.31749	1.59215	1.84046	4.23154	1.16561	1.06877	0.999927	1.27062	1.01377	1.09083
300	0	0	1.00001	1.08363	3.15655	1.00085	1.08328	1.42142	1.60906	1.52017	1.08444	1.07067	189.128	1.00102	1.33909	1.60356	1.8589	4.24841	1.17293	1.07262	0.999954	1.27309	1.00033	1.09653
600	0	0	1.00001	1.08717	3.17409	1.00034	1.07695	1.42052	1.60841	1.521	1.08861	1.07252	189.246	1.00038	1.34379	1.61279	1.86885	4.26515	1.17505	1.07327	0.999927	1.2752	1.00003	1.09967
1800	0	0	1	1.08453	3.18522	1.00151	1.07887	1.41902	1.60214	1.53353	1.0829	1.07462	189.838	1.00058	1.30861	1.63032	1.84849	4.27972	1.17866	1.07859	0.999919	1.2711	1.0003	1.1118
ARTAX deconvolution				Different spot measurements
MEAN RSD's (ARTAX)
Time (s)	C	O	Cl	Br	Rh	Na	Mg	Al	Si	P	S	K	Ca	Ti	Cr	Mn	Fe	Ni	Cu	Zn	Rb	Sr	Ba	Pb									LLD	C	O	Cl	Br	Rh	Na	Mg	Al	Si	P	S	K	Ca	Ti	Cr	Mn
3	0	0	14.8617	0.32053	0.0928755	0.827042	1.01553	0.334604	0.171417	0.196172	1.72969	11.6411	0.0017147	5.29197	5.7977	0.126669	0.116948	0.0296839	0.579904	0.300976	4.33041	0.110557	0.943171	0.0937502									t before	1	1	1	-INF	-INF	6	3	1	-INF	-INF	1	2	-INF	1	1	-INF
10	0	0	35.6	0.158882	0.0520976	3.97891	0.870142	0.179856	0.108805	0.104362	1.74704	3.41327	0.000937411	8.62956	10.8917	0.0686806	0.0616336	0.015955	0.274367	0.1773	29.4259	0.0598464	1.4556	0.156173									t after	1	1	INF	1	1	8	4	2	1	1	3	3	1	INF	INF	1
30	0	0	86.3	0.0846546	0.0291795	2.6697	0.448108	0.106851	0.0622834	0.0578898	0.136323	0.314742	0.000540734	8.21137	24.7854	0.0368873	0.0331314	0.00915632	0.138341	0.0921669	110.457	0.0340099	0.633134	0.0852231									D	0	0	0	0	0	-0.190457	-0.138816	-0.154748	0	0	-1.59337	-3.09852	0	0	0	0
60	0	0	121.3	0.0588387	0.0203714	6.6938	0.309292	0.0757795	0.0433178	0.0411715	0.0930731	6.56273	0.000382465	10.3076	22.924	0.0256892	0.0229622	0.00642903	0.0871266	0.061981	96.4561	0.0236714	0.410077	0.0589956									Dt	0	0	0	0	0	1500	30	7	0	0	27	20	0	0	0	0
120	0	0	170.933	0.0405118	0.0143134	0.833369	0.240545	0.0527856	0.0303104	0.0291229	0.0686939	0.127546	0.000270539	27.193	28.7506	0.0179085	0.0160676	0.00455078	0.0612755	0.0418079	222.475	0.0167793	0.224846	0.0407242									t LLD	0	0	INF	0	0	1479.95	55.5246	3.20826	0	0	26.7181	29.9015	0	INF	INF	0
300	0	0	277.2	0.0246545	0.00911378	0.479819	0.140596	0.0324375	0.0186049	0.0181591	0.0419675	0.0779228	0.000171664	20.8018	52.8417	0.0111565	0.0100555	0.00290639	0.0373779	0.0259669	447.126	0.0107361	0.148408	0.0241663
600	0	0	380.933	0.0172348	0.00636046	0.52157	0.0970901	0.0229575	0.0132815	0.0127381	0.0295002	0.0529706	0.000120981	37.0679	61.2864	0.00786487	0.00706451	0.00202373	0.0256659	0.0183536	323.017	0.00746184	0.0886385	0.017245									LLQ
1800	0	0	654.036	0.00971136	0.00370434	0.289363	0.0560137	0.0130705	0.00739691	0.00735698	0.0164408	0.0280006	6.99977e-05	53.0763	110.217	0.00451961	0.00398133	0.00117577	0.0145207	0.0100878	-198.836	0.00433316	0.0468202	0.00936994									t before	1	1	1	2	-INF	8	6	3	2	2	3	5	-INF	1	1	1
																																	t after	1	1	INF	3	1	INF	7	4	3	3	4	6	1	INF	INF	2
MEAN signal/noise (ARTAX)																																	D	0	0	0	-0.0742273	0	0	-0.0435055	-0.0310711	-0.0465216	-0.046472	-0.0432499	-0.0496228	0	0	0	-0.0579884
Time (s)	C	O	Cl	Br	Rh	Na	Mg	Al	Si	P	S	K	Ca	Ti	Cr	Mn	Fe	Ni	Cu	Zn	Rb	Sr	Ba	Pb									Dt	0	0	0	20	0	0	300	30	20	20	30	180	0	0	0	7
3	0	0	1.00319	1.09427	1.994	1.2211	1.17684	1.45552	2.24846	1.77686	1.38556	1.05356	180.569	1.28565	1.09007	1.92367	1.80804	3.2094	1.09777	1.16426	1.00167	1.27337	1.25336	1.12594									t LLQ	0	0	INF	25.8653	0	INF	579.935	36.6145	13.7853	11.8772	55.1952	219.918	0	INF	INF	6.21932
10	0	0	1.00047	1.09926	1.99004	1.11741	1.08965	1.38572	1.95652	1.53765	1.34384	1.06449	184.127	1.21337	1.06369	1.85733	1.78694	3.2628	1.09588	1.15636	1.00078	1.27321	1.11803	1.12006
30	0	0	1.00022	1.10454	2.03105	1.06099	1.09055	1.37449	1.96593	1.55598	1.32069	1.07302	186.717	1.22236	1.05058	1.93328	1.84745	3.3021	1.10748	1.16681	1.00042	1.27639	1.12505	1.12528
60	0	0	1.00011	1.10574	2.039	1.03767	1.08353	1.37464	1.99759	1.55015	1.32577	1.077	187.124	1.22188	1.06085	1.94983	1.88633	3.33988	1.11668	1.16937	1.00058	1.2814	1.1198	1.1246
120	0	0	1.00006	1.10837	2.04829	1.0383	1.07747	1.37302	2.00194	1.54757	1.31674	1.08433	188.175	1.21932	1.06162	1.97255	1.90094	3.34275	1.11748	1.17644	1.00019	1.28063	1.1303	1.13052
300	0	0	1.00002	1.11261	2.02129	1.03	1.08087	1.38937	2.08186	1.56409	1.31594	1.09035	189.251	1.23156	1.06911	1.99713	1.92444	3.32882	1.1219	1.18075	1.0002	1.27862	1.13257	1.1361
600	0	0	1.00001	1.11485	2.07892	1.02427	1.08157	1.38295	2.02891	1.56482	1.33878	1.08898	189.054	1.22392	1.06881	1.9936	1.91632	3.3738	1.1256	1.17845	1.00042	1.28244	1.14202	1.13653
1800	0	0	1	1.11739	2.07372	1.02333	1.08133	1.39344	2.10197	1.56846	1.34771	1.09485	189.595	1.23327	1.06737	2.01268	1.95332	3.36296	1.12837	1.18754	1.00042	1.28219	1.15359	1.14307
ARTAX deconvolution				pXRF measurements
MEAN RSD's (ARTAX)
Time (s)	C	O	Cl	Br	Rh	Na	Mg	Al	Si	P	S	K	Ca	Ti	Cr	Mn	Fe	Ni	Cu	Zn	Rb	Sr	Ba	Pb									LLD	C	O	Cl	Br	Rh	Na	Mg	Al	Si	P	S	K	Ca	Ti	Cr	Mn
3	0	0	9.91208	1.27124	3.15591	0.193672	0.630604	0.717885	0.601888	0.470545	1.71911	1.93316	0.00612682	4.26647	0.693106	0.43037	0.0992208	0.274797	0.336256	0.609529	-0.212118	0.0598624	1.08937	0.428348									t before	1	1	1	3	7	-INF	2	5	4	6	1	7	-INF	7	5	2
10	0	0	21.24	2.11965	3.39116	0.111861	0.359075	0.522283	0.966342	0.31933	3.94098	0.657125	0.00360484	5.04093	1.77314	0.386331	0.063834	0.182991	0.262928	0.660588	-4.18712	0.0357768	1.89347	1.32223									t after	1	1	INF	INF	INF	1	3	6	5	2	INF	INF	1	INF	7	3
30	0	0	36.6118	0.92616	1.22847	0.0587334	0.209194	0.412401	0.605178	0.594868	5.06766	0.697244	0.00210093	5.37859	0.737249	0.17699	0.0382496	0.117203	0.157701	0.415475	-3.09402	0.0207928	3.32856	1.29903									D	0	0	0	0	0	0	-0.149881	-0.116819	-0.0483333	-0.0822769	0	0	0	0	-0.0991563	-0.20934
45	0	0	53.0041	7.08264	1.39742	0.0463073	0.158135	0.348839	0.376744	0.625599	8.62379	3.83584	0.00175097	4.32203	0.685218	0.174415	0.0319089	0.101369	0.12804	0.405771	-10.1138	0.0176535	0.988441	0.702747									Dt	0	0	0	0	0	0	20	30	15	-80	0	0	0	0	60	20
60	0	0	49.6667	1.49388	1.77537	0.043333	0.151859	0.339455	0.328411	0.515909	9.53428	0.446168	0.00146797	1.29955	0.426788	0.130268	0.026894	0.0821451	0.117799	0.330229	-5.74777	0.0148169	1.12517	0.534504									t LLD	0	0	INF	INF	INF	0	13.8797	62.4281	59.5068	20.3752	INF	INF	0	INF	118.567	15.3817
90	0	0	57.6766	12.4174	2.73905	0.0302517	0.103929	0.222636	0.261593	0.401606	4.15575	0.370898	0.00119426	6.26408	0.442884	0.113629	0.0217323	0.0647054	0.0918359	0.283382	0.629545	0.0121176	7.05517	0.698436
120	0	0	81.5671	14.7603	0.818136	0.0272151	0.0954443	0.208936	0.29389	0.46404	10.4331	0.356393	0.0010672	0.618613	0.327632	0.0976735	0.0194058	0.0609066	0.0807989	0.252211	-5.47642	0.0107352	5.28516	-0.500998									LLQ
																																	t before	1	1	1	3	7	2	6	7	6	2	1	7	-INF	7	7	6
MEAN signal/noise (ARTAX)																																	t after	1	1	INF	INF	INF	3	7	INF	INF	INF	INF	INF	1	INF	INF	7
Time (s)	C	O	Cl	Br	Rh	Na	Mg	Al	Si	P	S	K	Ca	Ti	Cr	Mn	Fe	Ni	Cu	Zn	Rb	Sr	Ba	Pb									D	0	0	0	0	0	-0.0531281	-0.00848476	0	0	0	0	0	0	0	0	-0.0159557
3	0	0	1.01458	1.21717	1.064	1.73055	1.21432	1.22459	1.25462	1.32707	1.13156	1.08201	69.9986	1.18354	1.63123	1.8895	6.98537	2.56944	2.07802	1.59735	1.05047	2.21719	1.37977	1.48912									Dt	0	0	0	0	0	20	30	0	0	0	0	0	0	0	0	30
10	0	0	1.00332	1.09446	1.03747	1.72979	1.19127	1.15274	1.1431	1.24097	1.0696	1.0796	69.89	1.06953	1.22888	1.5401	5.2311	2.0271	1.70447	1.29431	1.01913	2.18591	1.11652	1.25648									t LLQ	0	0	INF	INF	INF	14.4652	103.892	INF	INF	INF	INF	INF	0	INF	INF	115.626
30	0	0	0.999783	1.05024	1.01461	1.77971	1.18466	1.09204	1.07837	1.07756	1.03578	1.04164	64.8248	1.06331	1.14189	1.56358	4.70514	1.82408	1.59801	1.20623	1.03019	2.18249	1.046	1.10234
45	0	0	1.00131	1.03387	1.01701	1.85301	1.2057	1.09041	1.09078	1.06599	1.03396	1.03514	65.3011	1.0595	1.1361	1.46105	4.6939	1.78262	1.59736	1.175	1.02608	2.14248	1.03581	1.0836
60	0	0	1.00058	1.02974	1.01433	1.75248	1.18129	1.08089	1.09263	1.06454	1.03662	1.04178	66.2566	1.07589	1.15342	1.53831	4.79609	1.81116	1.54131	1.17233	1.02414	2.16881	1.02618	1.06909
90	0	0	1.00078	1.02223	1.0136	1.9562	1.22186	1.09566	1.09212	1.06065	1.03162	1.03976	66.9484	1.06212	1.12192	1.49421	4.82389	1.85749	1.57669	1.1729	1.02618	2.17517	1.01935	1.06005
120	0	0	1.00051	1.02051	1.01124	1.90913	1.20943	1.08672	1.06557	1.04525	1.01635	1.0363	66.3141	1.06358	1.14155	1.50018	4.71632	1.78578	1.56519	1.16454	1.02287	2.15759	1.00747	1.04998
ARTAX deconvolution				maps																													LLD	C	O	Cl	Br	Rh	Na	Mg	Al	Si	P	S	K	Ca	Ti	Cr	Mn
																																	t before	1	1	2	-INF	-INF	3	-INF	-INF	-INF	-INF	-INF	-INF	-INF	-INF	-INF	-INF
MEAN RSD's (ARTAX)																																	t after	1	1	1	1	1	INF	1	1	1	1	1	1	1	1	INF	1
Time (s)	C	O	Cl	Br	Rh	Na	Mg	Al	Si	P	S	K	Ca	Ti	Cr	Mn	Fe	Ni	Cu	Zn	Rb	Sr	Ba	Pb									D	0	0	-285.9	0	0	0	0	0	0	0	0	0	0	0	0	0
300	0	0	0	0.0499588	0.0190913	3.83305	0.261318	0.0545539	0.0201797	0.0328315	0.0624739	0.107998	0.000300149	0.111922	58.6394	0.0242578	0.0118282	0.00499643	0.0618954	0.0697276	0	0.0188467	0.130885	0.0496585									Dt	0	0	-300	0	0	0	0	0	0	0	0	0	0	0	0	0
600	0	0	285.9	0.0268501	0.0110068	0.601247	0.147915	0.0301548	0.0114867	0.0181409	0.034974	0.0593666	0.000173191	0.065294	#DIV/0!	0.0139812	0.00677105	0.00286651	0.0335813	0.0384897	0	0.0107092	0.0712548	0.0259651									t LLD	0	0	300.346	0	0	INF	0	0	0	0	0	0	0	0	INF	0
1800	0	0	509.3	0.0136805	0.00525484	0.342456	0.082653	0.0173252	0.00664137	0.00996913	0.0205831	0.0302384	9.6574e-05	0.0457806	0.78255	0.00687449	0.00361143	0.00163036	0.0182733	0.0168465	-28.8264	0.0060995	0.0525046	0.0135305
																																	LLQ
MEAN signal/noise (ARTAX)																																	t before	1	1	2	-INF	-INF	3	2	-INF	-INF	-INF	-INF	1	-INF	1	-INF	-INF
Time (s)	C	O	Cl	Br	Rh	Na	Mg	Al	Si	P	S	K	Ca	Ti	Cr	Mn	Fe	Ni	Cu	Zn	Rb	Sr	Ba	Pb									t after	1	1	1	1	1	INF	3	1	1	1	1	2	1	2	INF	1
300	0	0	1.00007	1.09227	1.69208	1.0193	1.0812	1.37625	2.07804	1.51996	1.24198	1.07896	182.455	1.21142	1.00603	1.66692	2.18051	3.34327	1.12835	1.09667	1.00003	1.27751	1.18505	1.10569									D	0	0	-285.9	0	0	0	-0.0652624	0	0	0	0	-0.0486318	0	-0.0466282	0	0
600	0	0	1.00002	1.09929	1.69414	1.02458	1.07797	1.39376	2.10841	1.55011	1.24952	1.08291	182.607	1.20879	1.00526	1.66702	2.19332	3.37168	1.13683	1.10103	0.999997	1.2824	1.19508	1.11694									Dt	0	0	-300	0	0	0	1200	0	0	0	0	300	0	300	0	0
1800	0	0	1.00001	1.10778	1.83768	1.0197	1.07669	1.38193	2.06753	1.5608	1.23675	1.09167	184.309	1.16778	1.00919	1.79519	2.29625	3.31309	1.13953	1.12818	0.999999	1.27401	1.14861	1.12404									t LLQ	0	0	300.105	0	0	INF	1481.03	0	0	0	0	349.34	0	376.706	INF	0
mol%	Average spot measurements					ESPRIT
STDEV
Time (s)	C	O	Cl	Br	Rh	Na	Mg	Al	Si	P	S	K	Ca	Ti	Cr	Mn	Fe	Ni	Cu	Zn	Rb	Sr	Ba	Pb
3	0.000902239	0.000340808	0	1.28138e-06	0	0.000105334	0	7.21266e-05	0.00328656	2.05941e-06	2.7157e-05	3.05183e-05	0.00301045	0.000186659	1.37964e-06	1.06588e-05	3.5576e-05	8.42818e-07	3.71717e-07	3.88751e-06	0	3.35295e-06	4.46373e-06	7.7032e-07	0	0	0	0	0	0	0
10	0.00089596	0.00032835	2.66489e-06	1.41435e-06	0	2.93138e-05	1.89851e-05	6.06009e-05	0.00326525	1.82194e-06	4.8452e-05	3.60078e-05	0.00298679	0.000179099	1.95701e-06	9.32553e-06	3.13628e-05	2.9699e-07	9.64465e-07	4.18604e-06	0	2.93636e-06	9.03192e-06	2.29006e-06	0	0	0	0	0	0	0
30	0.00095467	0.000352642	6.67942e-07	1.8283e-06	0	5.15702e-07	7.102e-05	5.72227e-05	0.00351305	1.5303e-06	4.12684e-05	3.50897e-05	0.00316596	0.000173423	1.60044e-06	9.73913e-06	3.10112e-05	8.92316e-07	1.51568e-06	4.00649e-06	0	1.59561e-06	1.09503e-05	3.1259e-06	0	0	0	0	0	0	0
60	0.000994339	0.000366899	0	2.03311e-06	0	3.39143e-05	6.48764e-05	6.92096e-05	0.00360388	1.6414e-06	4.95133e-05	4.10751e-05	0.00329772	0.000201407	1.17379e-06	8.49119e-06	3.71541e-05	7.62875e-07	1.34815e-06	4.45913e-06	0	2.15086e-06	9.34522e-06	3.34312e-06	0	0	0	0	0	0	0
120	0.000994582	0.000367876	0	1.73611e-06	0	5.89326e-05	4.33043e-05	6.83729e-05	0.00360143	1.32848e-06	5.57983e-05	4.39302e-05	0.00331076	0.000211307	1.50217e-06	9.84436e-06	3.4176e-05	8.7902e-07	1.14642e-06	4.05265e-06	0	1.94562e-06	1.06239e-05	4.03122e-06	0	0	0	0	0	0	0
300	0.00103741	0.000382682	0	1.92663e-06	0	6.68892e-05	4.1603e-05	6.26714e-05	0.00382387	1.09402e-06	4.05908e-05	4.63555e-05	0.00343869	0.000186658	1.17098e-06	9.35292e-06	4.03588e-05	1.15888e-06	9.46794e-07	4.20887e-06	0	1.34636e-06	1.00681e-05	4.68475e-06	0	0	0	0	0	0	0
600	0.000986087	0.000360633	0	1.71842e-06	0	4.33722e-05	3.51265e-05	6.52002e-05	0.00359615	1.27444e-06	5.61637e-05	4.36642e-05	0.00326949	0.000190451	1.51145e-06	8.97547e-06	3.34838e-05	1.20762e-06	9.2565e-07	3.66234e-06	0	1.3617e-06	1.07407e-05	3.04859e-06	0	0	0	0	0	0	0
1800	0.00111591	0.000414832	0	1.73539e-06	0	5.79647e-05	3.40514e-05	7.20508e-05	0.0040499	1.24571e-06	6.52793e-05	4.93223e-05	0.00370752	0.000234986	1.62117e-06	1.0468e-05	3.81262e-05	1.7211e-06	1.05351e-06	4.18607e-06	3.29388e-08	1.91301e-06	1.20812e-05	4.08979e-06	0	0	0	0	0	0	0
MEAN
Time (s)																																		C	O	Cl	Br	Rh	Na	Mg	Al	Si	P	S	K	Ca	Ti	Cr	Mn
3	0.118412	0.47997	0	3.70349e-06	0	7.32307e-05	0	0.000249846	0.00523966	8.08569e-06	9.22098e-05	2.53577e-05	0.395075	0.000382609	2.83466e-06	0.000100478	0.000225633	1.3743e-06	4.99592e-07	1.64184e-05	0	0.000109565	9.50254e-06	8.67198e-07	0	0	0	0	0	0	0		lower limit	0.115714	0.479474	0	2.07998e-05	0	4.11786e-05	0.000740093	0.000380424	0	1.58808e-05	3.74178e-05	0	0.384749	0	2.47876e-06	9.20541e-05
10	0.118298	0.480008	1.85269e-06	1.02167e-05	0	3.50057e-05	1.82853e-05	0.000386539	0.00560723	7.52718e-06	8.63508e-05	3.3268e-05	0.394653	0.00033424	3.85762e-06	0.000102261	0.000235016	4.3359e-07	1.58811e-06	2.29867e-05	0	0.000133476	1.57967e-05	5.32943e-06	0	0	0	0	0	0	0		upper limit	0.120177	0.481133	0	2.77413e-05	0	0.000273038	0.000876299	0.000668627	0.014858	2.08637e-05	0.000298535	0.00014896	0.399579	0.00089606	8.96343e-06	0.000133926
30	0.118325	0.480058	4.64368e-07	1.51359e-05	0	3.31931e-07	0.000230753	0.000442148	0.00548049	1.29915e-05	0.000105789	3.9021e-05	0.394385	0.000350521	3.13946e-06	0.000106046	0.000236218	1.30729e-06	5.43268e-06	2.8304e-05	0	0.000145115	1.84992e-05	1.0224e-05	0	0	0	0	0	0	0		col_out	0	0	3	5	0	4	6	1	0	4	0	0	0	0	0	0
60	0.118357	0.480074	0	1.84347e-05	0	3.26842e-05	0.000399684	0.000459822	0.00532831	1.52886e-05	0.000113088	3.68703e-05	0.394214	0.000355939	3.69518e-06	0.000110104	0.000264221	9.85992e-07	4.72675e-06	3.01867e-05	0	0.000149858	1.63355e-05	1.41155e-05	0	0	0	0	0	0	0		col_in	0	0	0	6	0	5	7	2	0	5	0	0	0	0	0	0
120	0.118124	0.480175	0	1.99583e-05	0	8.13425e-05	0.000489974	0.00048669	0.00614587	1.60026e-05	0.000137518	4.41614e-05	0.393286	0.000391757	4.35097e-06	0.000110785	0.00025482	1.17887e-06	5.55894e-06	3.21572e-05	0	0.000151191	2.11549e-05	2.13437e-05	0	0	0	0	0	0	0		dt/dc	INF	INF	-1.93812e+08	9.54616e+07	INF	1.23309e+06	3.68274e+06	51209.7	INF	8.40289e+07	INF	INF	INF	INF	INF	INF
300	0.118251	0.480165	0	2.18439e-05	0	0.000119201	0.000673593	0.000497626	0.00571348	1.71357e-05	0.0001191	3.90351e-05	0.393407	0.000348764	5.14219e-06	0.000110773	0.000270009	2.63475e-06	6.99906e-06	3.45445e-05	0	0.000151132	1.96887e-05	2.57458e-05	0	0	0	0	0	0	0		t confident	0	0	120	200.326	0	70.4744	544.905	9.68683	0	109.765	0	0	0	0	0	0
600	0.118108	0.48025	0	2.36431e-05	0	0.000100861	0.000755054	0.000514026	0.00622977	1.84398e-05	0.00014391	4.58451e-05	0.392792	0.000379475	5.64569e-06	0.000112946	0.000267327	2.3441e-06	7.21355e-06	3.38303e-05	0	0.0001547	2.59269e-05	2.97197e-05	0	0	0	0	0	0	0
1800	0.117945	0.480304	0	2.42705e-05	0	0.000157108	0.000808196	0.000524525	0.0067582	1.83722e-05	0.000167976	5.0315e-05	0.392164	0.000426087	5.72109e-06	0.00011299	0.000270711	4.30578e-06	8.40912e-06	3.59192e-05	1.61646e-08	0.000153585	2.79287e-05	3.20665e-05	0	0	0	0	0	0	0
Coefficient of variation (RSD)
Time (s)	C	O	Cl	Br	Rh	Na	Mg	Al	Si	P	S	K	Ca	Ti	Cr	Mn	Fe	Ni	Cu	Zn	Rb	Sr	Ba	Pb										C	O	Cl	Br	Rh	Na	Mg	Al	Si	P	S	K	Ca	Ti	Cr	Mn
3	0.00761946	0.00071006	0	0.345991	0	1.43839	0	0.288684	0.627248	0.254698	0.294513	1.20351	0.00761994	0.487858	0.486704	0.106081	0.157672	0.61327	0.744041	0.236778	0	0.0306024	0.46974	0.888287									a (exponent)	0.031245	0.0287583		-0.216962		-0.217186		-0.093338	-0.00429981	-0.243018	-0.0013362	-0.0202813	0.0310747	0.0104891	-0.124753	-0.0248076
10	0.00757375	0.000684052	1.43839	0.138436	0	0.8374	1.03827	0.156778	0.582328	0.242048	0.561107	1.08236	0.00756814	0.535839	0.507312	0.0911932	0.133449	0.684956	0.607304	0.182107	0	0.0219991	0.571759	0.429701									b (constant in RSD)	0.00724362	0.000666946		0.292572		2.00997		0.228058	0.630596	0.317189	0.39728	1.14449	0.00723307	0.502091	0.611104	0.098802
30	0.00806824	0.000734581	1.43839	0.120792	0	1.55364	0.307776	0.12942	0.64101	0.117792	0.3901	0.899253	0.00802758	0.494758	0.509781	0.0918386	0.131282	0.682568	0.278994	0.141552	0	0.0109955	0.591935	0.305742									Rsquared	0.83728	0.738945		0.817189		0.764051		0.530199	0.0209987	0.871251	0.000233661	0.165023	0.833877	0.170985	0.708976	0.27981
60	0.00840116	0.000764254	0	0.110287	0	1.03764	0.162319	0.150514	0.676365	0.107361	0.437831	1.11404	0.0083653	0.565847	0.317653	0.0771198	0.140618	0.773714	0.285218	0.147718	0	0.0143527	0.572082	0.23684									a-1 (exponent of derivative)	-0.968755	-0.971242		-1.21696		-1.21719		-1.09334	-1.0043	-1.24302	-1.00134	-1.02028	-0.968925	-0.989511	-1.12475	-1.02481
120	0.00841982	0.000766129	0	0.0869866	0	0.724499	0.0883809	0.140486	0.585992	0.0830166	0.405753	0.994765	0.0084182	0.539383	0.34525	0.0888599	0.134118	0.745649	0.20623	0.126026	0	0.0128686	0.502194	0.188872									ab (constant of derivative in RSD/sec)	0.000226327	1.91802e-05		-0.0634772		-0.436539		-0.0212864	-0.00271144	-0.0770828	-0.000530847	-0.0232117	0.000224766	0.00526649	-0.0762373	-0.00245104
300	0.00877291	0.00079698	0	0.0881998	0	0.561145	0.0617628	0.125941	0.669272	0.0638448	0.340812	1.18753	0.0087408	0.535199	0.22772	0.0844335	0.149472	0.439845	0.135274	0.121839	0	0.00890848	0.511364	0.181962									t_minimal (time threshold is reached in sec)	2.32369	0.18265		200.892		978.414		134.696	26.734	210.154	5.29666	208.296	2.3068	54.925	365.164	22.684
600	0.00834906	0.000750928	0	0.0726817	0	0.43002	0.0465218	0.126842	0.577252	0.0691135	0.390269	0.95243	0.00832372	0.501879	0.267717	0.0794666	0.125254	0.515175	0.128321	0.108256	0	0.00880218	0.414268	0.102578									RSD at t_minimal	0.00743698	0.000635121		0.0925928		0.450495		0.144309	0.621749	0.0864769	0.396396	1.02704	0.0074234	0.523638	0.292709	0.0914394
1800	0.00946123	0.000863686	0	0.0715021	0	0.368948	0.0421326	0.137364	0.599257	0.0678041	0.388622	0.98027	0.009454	0.551498	0.283367	0.0926456	0.140837	0.399718	0.125281	0.116541	2.03771	0.0124558	0.432573	0.127541
ARTAX deconvolution				Average spot measurements
MEAN RSD's (ARTAX)
Time (s)	C	O	Cl	Br	Rh	Na	Mg	Al	Si	P	S	K	Ca	Ti	Cr	Mn	Fe	Ni	Cu	Zn	Rb	Sr	Ba	Pb									LLD	C	O	Cl	Br	Rh	Na	Mg	Al	Si	P	S	K	Ca	Ti	Cr	Mn
3	0	0	0	0.320731	0.0942072	0.891282	0.993811	0.328787	0.172557	0.193244	1.49205	12.0637	0.00171587	0	0	0.124973	0.116121	0.0297436	0.578064	0.307824	0	0.111713	0.879204	0.0793805									t before	1	1	-INF	-INF	-INF	6	3	-INF	-INF	-INF	1	2	-INF	-INF	2	-INF
10	0	0	0	0.159045	0.0529715	4.07349	0.865501	0.180705	0.109536	0.10353	1.88601	3.14826	0.000938038	0	10.3861	0.0678778	0.0613535	0.0159805	0.274973	0.17969	0	0.0602256	0	0.158557									t after	1	1	INF	1	1	8	4	1	1	1	3	3	1	INF	1	1
30	0	0	0	0.085581	0.0297268	3.00478	0.439706	0.10733	0.0632148	0.0576561	0.136169	0.313005	0.000541112	8.17531	25.4994	0.0364233	0.0330903	0.00917008	0.139162	0.0921121	0	0.0340427	0.620873	0.0875517									D	0	0	0	0	0	-0.191661	-0.128953	0	0	0	-1.35588	-2.83525	0	0	-10.3861	0
60	0	0	0	0.059507	0.0207248	6.67384	0.310753	0.0758465	0.0439349	0.041236	0.0929841	6.56428	0.000382751	0	0	0.025458	0.0229867	0.00644056	0.087404	0.0618452	0	0.0236769	0.413386	0.0604629									Dt	0	0	0	0	0	1500	30	0	0	0	27	20	0	0	-7	0
120	0	0	0	0.0406629	0.0145556	0.740781	0.241763	0.0526441	0.0307167	0.0290802	0.0680659	0.127727	0.000270774	0	29.4542	0.017749	0.0160475	0.00456021	0.0613985	0.0417264	0	0.0167834	0.221186	0.041625									t LLD	0	0	INF	0	0	1539.1	55.5223	0	0	0	26.1402	29.8801	0	INF	3.22241	0
300	0	0	0	0.0247902	0.00927279	0.488325	0.140682	0.032406	0.0187998	0.0181621	0.0417725	0.0784476	0.000171736	0	0	0.0110261	0.0100842	0.00290859	0.0373926	0.0259893	0	0.0107392	0.152924	0.0245366
600	0	0	0	0.0173143	0.00647542	0.546656	0.0977111	0.0229935	0.013458	0.0127791	0.0294427	0.0533131	0.000121067	0	62.899	0.00779545	0.00706172	0.0020277	0.025664	0.0182714	0	0.0074619	0.0883135	0.0176054									LLQ
1800	0	0	#DIV/0!	0.00975701	0.00377265	0.296664	0.0556882	0.0130302	0.00749385	0.00736098	0.0164902	0.0279986	7.00365e-05	#DIV/0!	107.001	0.00447193	0.00398916	0.00117767	0.0144899	0.0100582	#DIV/0!	0.00433205	0.0466514	0.009537									t before	1	1	-INF	2	-INF	8	6	3	2	2	3	5	-INF	-INF	2	1
																																	t after	1	1	INF	3	1	INF	7	4	3	3	4	6	1	INF	1	2
MEAN signal/noise (ARTAX)																																	D	0	0	0	-0.0734637	0	0	-0.0429708	-0.0314838	-0.0463208	-0.0458737	-0.0431846	-0.0492797	0	0	-10.3861	-0.0570956
Time (s)	C	O	Cl	Br	Rh	Na	Mg	Al	Si	P	S	K	Ca	Ti	Cr	Mn	Fe	Ni	Cu	Zn	Rb	Sr	Ba	Pb									Dt	0	0	0	20	0	0	300	30	20	20	30	180	0	0	-7	7
3	0	0	1.00353	1.09363	1.98058	1.21154	1.17739	1.46158	2.27852	1.79124	1.39378	1.05333	180.55	1.28901	1.08308	1.94975	1.82178	3.20472	1.09724	1.16399	1.00157	1.26994	1.24738	1.12367									t LLQ	0	0	INF	26.0745	0	INF	584.02	36.9848	14.1172	11.5389	55.1261	221.277	0	INF	3.0674	6.06178
10	0	0	1.00047	1.09948	1.97196	1.11516	1.08859	1.38386	1.97108	1.54335	1.349	1.0654	184.281	1.21974	1.06492	1.87891	1.79986	3.26135	1.09547	1.1558	1.00074	1.27133	1.11993	1.11906
30	0	0	1.00021	1.10337	2.01078	1.06139	1.09247	1.37361	1.979	1.55823	1.32025	1.07501	186.779	1.23264	1.04985	1.95682	1.85954	3.3029	1.10762	1.16712	1.00046	1.2763	1.13078	1.12225
60	0	0	1.00011	1.10476	2.02024	1.03865	1.083	1.37443	2.01353	1.54893	1.32711	1.07853	187.218	1.23465	1.059	1.96626	1.89704	3.33928	1.1165	1.16944	1.00063	1.28144	1.12312	1.12245
120	0	0	1.00005	1.10815	2.02935	1.03904	1.07731	1.37494	2.01832	1.54928	1.31885	1.08581	188.265	1.23208	1.06122	1.99014	1.91363	3.34268	1.11733	1.17699	1.00021	1.28071	1.13305	1.12827
300	0	0	1.00002	1.11224	2.00203	1.02996	1.08082	1.39056	2.10263	1.5642	1.31762	1.09163	189.331	1.24369	1.07014	2.01845	1.93235	3.33111	1.12204	1.18104	1.00022	1.27868	1.13355	1.13459
600	0	0	1.00001	1.11448	2.05821	1.02386	1.08114	1.3833	2.0456	1.56322	1.34076	1.09026	189.141	1.23599	1.06789	2.01102	1.92972	3.3731	1.12582	1.17922	1.00046	1.28257	1.14497	1.13434
1800	0	0	1	1.11697	2.05035	1.02338	1.0818	1.39604	2.12415	1.56881	1.35055	1.09675	189.734	1.2466	1.06768	2.03434	1.96658	3.36379	1.12891	1.18791	1.00045	1.28247	1.15639	1.14126
STANDARD VALUES
mol%	Average spot measurements					ESPRIT
STDEV
Time (s)	C	O	Cl	Br	Rh	Na	Mg	Al	Si	P	S	K	Ca	Ti	Cr	Mn	Fe	Ni	Cu	Zn	Rb	Sr	Ba	Pb
3	0.000352874	0	0	0	0	6.06159e-05	6.31483e-05	3.73166e-05	0.000105882	6.67123e-06	1.81783e-05	4.33661e-05	0.00140333	1.00532e-05	0	5.85856e-06	4.0326e-05	0	0	0	0	1.13534e-05	1.02141e-05	0	0	0	0	0	0	0	0
10	0.000352874	0	0	0	0	6.06159e-05	6.31483e-05	3.73166e-05	0.000105882	6.67123e-06	1.81783e-05	4.33661e-05	0.00140333	1.00532e-05	0	5.85856e-06	4.0326e-05	0	0	0	0	1.13534e-05	1.02141e-05	0	0	0	0	0	0	0	0
30	0.000352874	0	0	0	0	6.06159e-05	6.31483e-05	3.73166e-05	0.000105882	6.67123e-06	1.81783e-05	4.33661e-05	0.00140333	1.00532e-05	0	5.85856e-06	4.0326e-05	0	0	0	0	1.13534e-05	1.02141e-05	0	0	0	0	0	0	0	0
60	0.000352874	0	0	0	0	6.06159e-05	6.31483e-05	3.73166e-05	0.000105882	6.67123e-06	1.81783e-05	4.33661e-05	0.00140333	1.00532e-05	0	5.85856e-06	4.0326e-05	0	0	0	0	1.13534e-05	1.02141e-05	0	0	0	0	0	0	0	0
120	0.000352874	0	0	0	0	6.06159e-05	6.31483e-05	3.73166e-05	0.000105882	6.67123e-06	1.81783e-05	4.33661e-05	0.00140333	1.00532e-05	0	5.85856e-06	4.0326e-05	0	0	0	0	1.13534e-05	1.02141e-05	0	0	0	0	0	0	0	0
300	0.000352874	0	0	0	0	6.06159e-05	6.31483e-05	3.73166e-05	0.000105882	6.67123e-06	1.81783e-05	4.33661e-05	0.00140333	1.00532e-05	0	5.85856e-06	4.0326e-05	0	0	0	0	1.13534e-05	1.02141e-05	0	0	0	0	0	0	0	0
600	0.000352874	0	0	0	0	6.06159e-05	6.31483e-05	3.73166e-05	0.000105882	6.67123e-06	1.81783e-05	4.33661e-05	0.00140333	1.00532e-05	0	5.85856e-06	4.0326e-05	0	0	0	0	1.13534e-05	1.02141e-05	0	0	0	0	0	0	0	0
1800	0.000352874	0	0	0	0	6.06159e-05	6.31483e-05	3.73166e-05	0.000105882	6.67123e-06	1.81783e-05	4.33661e-05	0.00140333	1.00532e-05	0	5.85856e-06	4.0326e-05	0	0	0	0	1.13534e-05	1.02141e-05	0	0	0	0	0	0	0	0
MEAN
Time (s)
3	0.118659	0.479502	0	0	0	0.000123732	0.000933365	0.000660714	0.00329363	2.32925e-05	6.60452e-05	0.000177225	0.395889	5.48366e-05	0	7.97157e-05	0.000316522	0	0	0	0	0.000164169	5.67654e-05	0	0	0	0	0	0	0	0
10	0.118659	0.479502	0	0	0	0.000123732	0.000933365	0.000660714	0.00329363	2.32925e-05	6.60452e-05	0.000177225	0.395889	5.48366e-05	0	7.97157e-05	0.000316522	0	0	0	0	0.000164169	5.67654e-05	0	0	0	0	0	0	0	0
30	0.118659	0.479502	0	0	0	0.000123732	0.000933365	0.000660714	0.00329363	2.32925e-05	6.60452e-05	0.000177225	0.395889	5.48366e-05	0	7.97157e-05	0.000316522	0	0	0	0	0.000164169	5.67654e-05	0	0	0	0	0	0	0	0
60	0.118659	0.479502	0	0	0	0.000123732	0.000933365	0.000660714	0.00329363	2.32925e-05	6.60452e-05	0.000177225	0.395889	5.48366e-05	0	7.97157e-05	0.000316522	0	0	0	0	0.000164169	5.67654e-05	0	0	0	0	0	0	0	0
120	0.118659	0.479502	0	0	0	0.000123732	0.000933365	0.000660714	0.00329363	2.32925e-05	6.60452e-05	0.000177225	0.395889	5.48366e-05	0	7.97157e-05	0.000316522	0	0	0	0	0.000164169	5.67654e-05	0	0	0	0	0	0	0	0
300	0.118659	0.479502	0	0	0	0.000123732	0.000933365	0.000660714	0.00329363	2.32925e-05	6.60452e-05	0.000177225	0.395889	5.48366e-05	0	7.97157e-05	0.000316522	0	0	0	0	0.000164169	5.67654e-05	0	0	0	0	0	0	0	0
600	0.118659	0.479502	0	0	0	0.000123732	0.000933365	0.000660714	0.00329363	2.32925e-05	6.60452e-05	0.000177225	0.395889	5.48366e-05	0	7.97157e-05	0.000316522	0	0	0	0	0.000164169	5.67654e-05	0	0	0	0	0	0	0	0
1800	0.118659	0.479502	0	0	0	0.000123732	0.000933365	0.000660714	0.00329363	2.32925e-05	6.60452e-05	0.000177225	0.395889	5.48366e-05	0	7.97157e-05	0.000316522	0	0	0	0	0.000164169	5.67654e-05	0	0	0	0	0	0	0	0
Coefficient of variation (RSD)
Time (s)	C	O	Cl	Br	Rh	Na	Mg	Al	Si	P	S	K	Ca	Ti	Cr	Mn	Fe	Ni	Cu	Zn	Rb	Sr	Ba	Pb
3	0.00297385	0	0	0	0	0.489898	0.0676566	0.0564791	0.0321475	0.286411	0.275241	0.244695	0.00354476	0	0	0.0734931	0.127403	0	0	0	0	0.0691567	0.179935	0
10	0.00297385	0	0	0	0	0.489898	0.0676566	0.0564791	0.0321475	0.286411	0.275241	0.244695	0.00354476	0	0	0.0734931	0.127403	0	0	0	0	0.0691567	0.179935	0
30	0.00297385	0	0	0	0	0.489898	0.0676566	0.0564791	0.0321475	0.286411	0.275241	0.244695	0.00354476	0	0	0.0734931	0.127403	0	0	0	0	0.0691567	0.179935	0
60	0.00297385	0	0	0	0	0.489898	0.0676566	0.0564791	0.0321475	0.286411	0.275241	0.244695	0.00354476	0	0	0.0734931	0.127403	0	0	0	0	0.0691567	0.179935	0
120	0.00297385	0	0	0	0	0.489898	0.0676566	0.0564791	0.0321475	0.286411	0.275241	0.244695	0.00354476	0	0	0.0734931	0.127403	0	0	0	0	0.0691567	0.179935	0
300	0.00297385	0	0	0	0	0.489898	0.0676566	0.0564791	0.0321475	0.286411	0.275241	0.244695	0.00354476	0	0	0.0734931	0.127403	0	0	0	0	0.0691567	0.179935	0
600	0.00297385	0	0	0	0	0.489898	0.0676566	0.0564791	0.0321475	0.286411	0.275241	0.244695	0.00354476	0	0	0.0734931	0.127403	0	0	0	0	0.0691567	0.179935	0
1800	0.00297385	0	0	0	0	0.489898	0.0676566	0.0564791	0.0321475	0.286411	0.275241	0.244695	0.00354476	0	0	0.0734931	0.127403	0	0	0	0	0.0691567	0.179935	0
ICP-MS VALUES
mol%	Average spot measurements					ESPRIT
STDEV
Time (s)	C	O				Na23(MR)	Mg26(MR)	Al27(MR)	Si28(MR)	P31(MR)	S32(MR)	K39(HR)	Ca42(MR)	Ti47(MR)	Cr52(MR)	Mn55(MR)	Fe56(MR)	Ni60(MR)	Cu63(MR)	Zn66(MR)	Rb85(LR)	Sr86/88(LR)	Ba138(LR)	Pb208(LR)	Li7(LR)	B11(LR)	V51(MR)	Co59(MR)	As75(HR)	Cd114(LR)	Hg202(LR)
	0.000106166	0.000424269	0	0	0	0.000432842	7.51199e-05	2.8597e-05	0.0017805	0.000186632	0.000197331	4.50446e-05	0.000262083	3.32292e-06	3.93905e-07	7.34819e-06	1.03474e-05	2.5835e-06	1.19994e-05	1.8656e-05	3.64091e-07	6.0211e-06	1.99892e-05	1.8201e-07	9.05003e-08	1.6231e-06	5.68018e-08	1.68385e-08	1.25259e-08	1.37948e-08	1.61125e-08
MEAN
Time (s)
	0.118897	0.475146	0	0	0	0.000566018	0.00093712	0.000240397	0.00764119	0.000237769	0.000229215	0.00019805	0.395134	5.34767e-06	3.80468e-06	9.07996e-05	0.000284692	6.56081e-06	3.14787e-05	8.32876e-05	7.17671e-07	0.00017727	7.46874e-05	4.11274e-06	5.00184e-07	7.68262e-06	1.83627e-06	3.11262e-07	9.22414e-08	9.06156e-07	2.89156e-07
Coefficient of variation (RSD)
Time (s)	C	O				Na23(MR)	Mg26(MR)	Al27(MR)	Si28(MR)	P31(MR)	S32(MR)	K39(HR)	Ca42(MR)	Ti47(MR)	Cr52(MR)	Mn55(MR)	Fe56(MR)	Ni60(MR)	Cu63(MR)	Zn66(MR)	Rb85(LR)	Sr86/88(LR)	Ba138(LR)	Pb208(LR)	Li7(LR)	B11(LR)	V51(MR)	Co59(MR)	As75(HR)	Cd114(LR)	Hg202(LR)
	0.000892924	0.000892924	#DIV/0!	#DIV/0!	#DIV/0!	0.764713	0.0801604	0.118957	0.233013	0.784929	0.860897	0.227441	0.000663276	0.621378	0.103532	0.0809275	0.0363459	0.393778	0.381192	0.223995	0.507324	0.0339658	0.267638	0.0442552	0.180934	0.211269	0.0309333	0.0540977	0.135794	0.0152235	0.0557226
[truncated: 8 more columns]

## Sheet: CRM512
Overview table of repeatability tests on M4 and Tracer																																	POWER FUNCTION FIT
																																	threshold value =	0.0001	RSD/s		2	SD
	12.0107	15.9994	35.453	79.904	102.906	22.9898	24.305	26.9815	28.0855	30.9738	32.065	39.0983	40.078	47.867	51.9961	54.938	55.845	58.6934	63.546	65.38	85.4678	87.62	137.327	207.2	6.941	10.811	50.9415	58.9332	39.948	112.411	200.59
mol%	Same-spot measurements
STDEV
Time (s)	C	O	Cl	Br	Rh	Na	Mg	Al	Si	P	S	K	Ca	Ti	Cr	Mn	Fe	Ni	Cu	Zn	Rb	Sr	Ba	Pb	Li7(LR)	B11(LR)	V51(MR)	Co59(MR)	As75(HR)	Cd114(LR)	Hg202(LR)
3
10
30
60
120
300
600
1800
MEAN
Time (s)	C	O	Cl	Br	Rh	Na	Mg	Al	Si	P	S	K	Ca	Ti	Cr	Mn	Fe	Ni	Cu	Zn	Rb	Sr	Ba	Pb										C	O	Cl	Br	Rh	Na	Mg	Al	Si	P	S	K	Ca	Ti	Cr	Mn
3																																	lower limit	0	0	0	0	0	0	0	0	0	0	0	0	0	0	0	0
10																																	upper limit	0	0	0	0	0	0	0	0	0	0	0	0	0	0	0	0
30																																	col_out	0	0	0	0	0	0	0	0	0	0	0	0	0	0	0	0
60																																	col_in	0	0	0	0	0	0	0	0	0	0	0	0	0	0	0	0
120																																	dt/dc	INF	INF	INF	INF	INF	INF	INF	INF	INF	INF	INF	INF	INF	INF	INF	INF
300																																	t confident	0	0	0	0	0	0	0	0	0	0	0	0	0	0	0	0
600
1800
Coefficient of variation (RSD)
Time (s)	C	O	Cl	Br	Rh	Na	Mg	Al	Si	P	S	K	Ca	Ti	Cr	Mn	Fe	Ni	Cu	Zn	Rb	Sr	Ba	Pb										C	O	Cl	Br	Rh	Na	Mg	Al	Si	P	S	K	Ca	Ti	Cr	Mn
3																																	a (exponent)
10																																	b (constant in RSD)
30																																	Rsquared
60																																	a-1 (exponent of derivative)
120																																	ab (constant of derivative in RSD/sec)
300																																	t_minimal (time threshold is reached in sec)
600																																	RSD at t_minimal
1800
mol%	Different spot measurements
STDEV
Time (s)	C	O	Cl	Br	Rh	Na	Mg	Al	Si	P	S	K	Ca	Ti	Cr	Mn	Fe	Ni	Cu	Zn	Rb	Sr	Ba	Pb
3	0.00192811	0.00532894	1.9033e-05	7.85917e-06	0	0	0.0170155	0.000380957	0.00518396	4.98437e-05	0.000356532	0	0.0240987	0.000154731	1.55656e-05	8.79257e-06	7.24519e-05	1.76284e-05	6.52701e-07	9.30382e-06	0	0.000111429	2.12641e-05	1.57936e-05	0	0	0	0	0	0	0
10	0.00157292	0.00243389	4.13717e-05	7.2835e-06	0	1.60181e-05	0.00766657	0.000340298	0.00556669	3.04386e-05	0.000223523	0	0.0115982	0.000129408	1.5602e-05	7.86294e-06	6.34869e-05	1.6819e-05	1.74638e-06	1.12651e-05	0	9.52104e-05	3.18742e-05	2.10704e-05	0	0	0	0	0	0	0
30	0.00145168	0.00233126	0	6.65852e-06	0	0	0.00738411	0.000335455	0.0050461	2.06178e-05	0.000172792	0	0.0108497	0.000103912	1.77433e-05	7.89476e-06	6.40031e-05	1.56812e-05	3.35561e-06	1.18676e-05	7.48933e-08	0.000100585	3.15139e-05	2.42267e-05	0	0	0	0	0	0	0
60	0.00137357	0.00210913	0	6.10618e-06	0	0.000477966	0.00645468	0.00021815	0.00505187	1.06685e-05	0.000120226	0	0.0100386	9.87948e-05	1.68313e-05	7.1212e-06	6.14773e-05	1.61265e-05	3.05303e-06	1.13637e-05	1.45561e-07	9.89506e-05	3.45971e-05	2.39379e-05	0	0	0	0	0	0	0
120	0.00138096	0.00217984	0	6.30724e-06	0	0.000303132	0.0067782	0.000154925	0.00496902	9.6901e-06	0.000107389	3.36679e-06	0.0101781	0.00010562	1.77181e-05	6.49895e-06	6.07293e-05	1.54873e-05	4.23353e-06	1.18933e-05	4.24442e-07	9.70575e-05	3.36233e-05	2.27934e-05	0	0	0	0	0	0	0
300	0.00144048	0.00217951	0	5.86973e-06	0	0.000952834	0.00664682	0.00016081	0.00503826	7.76432e-06	7.13819e-05	2.52405e-06	0.00998997	9.82816e-05	1.74952e-05	6.6939e-06	6.07816e-05	1.58938e-05	3.74711e-06	1.21693e-05	1.18354e-06	9.53237e-05	3.67659e-05	2.37396e-05	0	0	0	0	0	0	0
600	0.00140467	0.00212112	0	5.87508e-06	0	0.000790003	0.00649629	0.00015334	0.00509422	7.71817e-06	5.93505e-05	3.58762e-06	0.00982039	0.00010399	1.75072e-05	6.90337e-06	6.05676e-05	1.55976e-05	4.05529e-06	1.19828e-05	1.59297e-06	9.56073e-05	3.59132e-05	2.42479e-05	0	0	0	0	0	0	0
1800	0.00144118	0.00213577	0	6.18225e-06	0	0.00142325	0.0064048	0.00013404	0.00503967	6.25049e-06	3.98816e-05	5.32993e-06	0.00955567	0.00010187	1.72847e-05	6.81144e-06	5.9495e-05	1.59639e-05	4.32046e-06	1.23617e-05	1.86087e-06	9.71249e-05	3.79749e-05	2.37951e-05	0	0	0	0	0	0	0
MEAN
Time (s)																																		C	O	Cl	Br	Rh	Na	Mg	Al	Si	P	S	K	Ca	Ti	Cr	Mn
3	0.127805	0.516662	5.80584e-06	5.11353e-06	0	0	0.117794	0.000188563	0.00444932	5.56025e-05	0.000261627	0	0.232154	0.000124786	5.96289e-06	8.5537e-06	0.000282204	1.96349e-05	1.19166e-07	3.41763e-06	0	0.000161611	5.37876e-06	7.94265e-06	0	0	0	0	0	0	0		lower limit	0.125355	0.519296	0	1.01325e-05	0	-0.00178513	0.127212	0.00104756	-0.00222938	6.12466e-05	0.000125074	-9.68675e-06	0.177825	-0.000126847	-2.52126e-05	6.20931e-06
10	0.128391	0.520337	1.08989e-05	1.1305e-05	0	2.92449e-06	0.12934	0.000352013	0.00567266	3.97828e-05	0.000146898	0	0.215069	8.67248e-05	5.81724e-06	1.26583e-05	0.000288579	2.83892e-05	4.10162e-07	5.51964e-06	0	0.000168781	8.87434e-06	2.08492e-05	0	0	0	0	0	0	0		upper limit	0.13112	0.527839	0	3.48615e-05	0	0.00390786	0.152831	0.00158372	0.0179293	8.62486e-05	0.0002846	1.1633e-05	0.216047	0.000280633	4.39261e-05	3.34551e-05
30	0.128567	0.521886	0	1.4654e-05	0	0	0.134184	0.000702461	0.00614686	5.74585e-05	0.000130686	0	0.207664	7.62399e-05	8.16294e-06	1.5997e-05	0.000290086	3.0755e-05	1.06368e-06	8.45102e-06	1.36736e-08	0.000175716	9.56295e-06	3.08457e-05	0	0	0	0	0	0	0		col_out	0	1	2	1	0	0	1	4	0	4	4	0	1	0	0	0
60	0.128502	0.522767	0	1.7805e-05	0	0.000151262	0.136948	0.000991619	0.00689647	5.27699e-05	0.000115957	0	0.202891	7.7618e-05	7.95662e-06	1.68008e-05	0.000293291	3.38302e-05	1.0805e-06	8.89775e-06	2.65757e-08	0.000177149	1.23578e-05	3.76588e-05	0	0	0	0	0	0	0		col_in	0	2	0	2	0	0	2	5	0	5	5	0	2	0	0	0
120	0.12846	0.523177	0	1.94209e-05	0	8.71437e-05	0.138054	0.00108122	0.00732164	6.21194e-05	0.00013104	6.14689e-07	0.200924	7.62139e-05	8.29284e-06	1.79044e-05	0.000295996	3.43e-05	1.70338e-06	1.0196e-05	1.19234e-07	0.0001802	1.47352e-05	4.10601e-05	0	0	0	0	0	0	0		dt/dc	INF	1904.76	-1.00928e+07	1.13058e+06	INF	INF	606.25	669651	INF	6.41746e+06	3.97809e+06	INF	-409.706	INF	INF	INF
300	0.128362	0.523369	0	2.07644e-05	0	0.000317585	0.138774	0.00121948	0.00759852	6.61108e-05	0.000169151	4.60826e-07	0.19941	7.54735e-05	8.91494e-06	1.87201e-05	0.000298297	3.62875e-05	1.84001e-06	1.12123e-05	3.73255e-07	0.000182006	1.60899e-05	4.47661e-05	0	0	0	0	0	0	0		t confident	0	8.01721	120	8.6744	0	0	8.70939	97.4606	0	114.399	96.2661	0	9.59903	0	0	0
600	0.128367	0.523665	0	2.15897e-05	0	0.000421076	0.139764	0.00125504	0.00775601	7.09792e-05	0.000183141	6.55007e-07	0.197794	7.75145e-05	9.05086e-06	1.93086e-05	0.000297931	3.66311e-05	2.2734e-06	1.15713e-05	6.03352e-07	0.000181892	1.75354e-05	4.72153e-05	0	0	0	0	0	0	0
1800	0.128237	0.523567	0	2.2497e-05	0	0.00106136	0.140021	0.00131564	0.00784997	7.37476e-05	0.000204837	9.73107e-07	0.196936	7.68928e-05	9.35672e-06	1.98322e-05	0.000297944	3.74668e-05	2.65813e-06	1.24193e-05	6.79405e-07	0.000183369	1.89705e-05	4.98039e-05	0	0	0	0	0	0	0
Coefficient of variation (RSD)
Time (s)	C	O	Cl	Br	Rh	Na	Mg	Al	Si	P	S	K	Ca	Ti	Cr	Mn	Fe	Ni	Cu	Zn	Rb	Sr	Ba	Pb										C	O	Cl	Br	Rh	Na	Mg	Al	Si	P	S	K	Ca	Ti	Cr	Mn
3	0.0150864	0.0103142	3.27825	1.53694	0	0	0.144451	2.02031	1.16511	0.89643	1.36275	0	0.103805	1.23997	2.6104	1.02793	0.256736	0.897809	5.47723	2.72231	0	0.689492	3.95334	1.98845									a (exponent)	-0.0382743	-0.107756		-0.251298			-0.139332	-0.490813	-0.0958681	-0.409655	-0.335808		-0.0854641	-0.000874744	-0.0601446	-0.162166
10	0.012251	0.00467753	3.79596	0.644271	0	5.47723	0.0592743	0.96672	0.98132	0.765119	1.52162	0	0.0539279	1.49216	2.68203	0.621168	0.219999	0.592442	4.25778	2.04092	0	0.564106	3.59173	1.01061									b (constant in RSD)	0.0137491	0.00760269		1.28656			0.105327	2.51469	1.18318	1.41299	3.10624		0.0807303	1.34355	2.82234	0.947558
30	0.0112913	0.004467	0	0.454381	0	0	0.0550297	0.477543	0.820924	0.35883	1.32219	0	0.0522465	1.36296	2.17365	0.493514	0.220635	0.509874	3.1547	1.40428	5.47723	0.572431	3.29542	0.785416									Rsquared	0.513539	0.51677		0.80238			0.590255	0.901253	0.877359	0.941555	0.871419		0.506222	0.00107743	0.89116	0.823016
60	0.0106891	0.00403454	0	0.342947	0	3.15985	0.0471325	0.219994	0.73253	0.202171	1.03681	0	0.0494776	1.27283	2.11539	0.42386	0.209612	0.476691	2.82558	1.27714	5.47723	0.558573	2.79962	0.635653									a-1 (exponent of derivative)	-1.03827	-1.10776		-1.2513			-1.13933	-1.49081	-1.09587	-1.40965	-1.33581		-1.08546	-1.00087	-1.06014	-1.16217
120	0.0107501	0.00416653	0	0.324765	0	3.47852	0.0490981	0.143288	0.678675	0.155992	0.819513	5.47723	0.0506564	1.38583	2.13656	0.36298	0.20517	0.451526	2.48538	1.16647	3.55974	0.53861	2.28184	0.555123									ab (constant of derivative in RSD/sec)	-0.000526238	-0.000819238		-0.323311			-0.0146754	-1.23424	-0.113429	-0.578839	-1.0431		-0.00689954	-0.00117527	-0.169748	-0.153661
300	0.011222	0.00416439	0	0.282682	0	3.00025	0.0478968	0.131867	0.663058	0.117444	0.422002	5.47723	0.0500977	1.3022	1.96245	0.357579	0.203762	0.437996	2.03646	1.08535	3.17085	0.523739	2.28503	0.530303									t_minimal (time threshold is reached in sec)	4.9499	6.67665		637.945			79.732	555.149	613.045	466.803	1018.97		49.4357	11.7274	1113.19	551.975
600	0.0109426	0.00405052	0	0.272124	0	1.87615	0.0464804	0.122179	0.65681	0.108738	0.324069	5.47723	0.0496497	1.34155	1.93432	0.357528	0.203294	0.425801	1.7838	1.03556	2.6402	0.525628	2.04804	0.513561									RSD at t_minimal	0.0129327	0.00619606		0.25386			0.0572244	0.113108	0.639467	0.11395	0.303438		0.0578438	1.34066	1.85086	0.340378
1800	0.0112384	0.00407928	0	0.274803	0	1.34096	0.0457416	0.101882	0.641999	0.0847551	0.194699	5.47723	0.0485217	1.32483	1.8473	0.343454	0.199685	0.426082	1.62537	0.995365	2.73897	0.52967	2.00179	0.477775
pXRF quantification Carbonate Standard
mol% pXRF spot
STDEV
Time (s)	C	O	Cl	Br	Rh	Na	Mg	Al	Si	P	S	K	Ca	Ti	Cr	Mn	Fe	Ni	Cu	Zn	Rb	Sr	Ba	Pb
3
10
30
45
60
90
120
300
600
1800
MEAN
Time (s)	C	O	Cl	Br	Rh	Na	Mg	Al	Si	P	S	K	Ca	Ti	Cr	Mn	Fe	Ni	Cu	Zn	Rb	Sr	Ba	Pb										C	O	Cl	Br	Rh	Na	Mg	Al	Si	P	S	K	Ca	Ti	Cr	Mn
3																																	lower limit	0	0	0	0	0	0	0	0	0	0	0	0	0	0	0	0
10																																	upper limit	0	0	0	0	0	0	0	0	0	0	0	0	0	0	0	0
30																																	col_out	0	0	0	0	0	0	0	0	0	0	0	0	0	0	0	0
45																																	col_in	0	0	0	0	0	0	0	0	0	0	0	0	0	0	0	0
60																																	dt/dc	INF	INF	INF	INF	INF	INF	INF	INF	INF	INF	INF	INF	INF	INF	INF	INF
90																																	t confident	0	0	0	0	0	0	0	0	0	0	0	0	0	0	0	0
120
300
600
1800
Coefficient of variation (RSD)
Time (s)	C	O	Cl	Br	Rh	Na	Mg	Al	Si	P	S	K	Ca	Ti	Cr	Mn	Fe	Ni	Cu	Zn	Rb	Sr	Ba	Pb										C	O	Cl	Br	Rh	Na	Mg	Al	Si	P	S	K	Ca	Ti	Cr	Mn
3																																	a (exponent)
10																																	b (constant in RSD)
30																																	Rsquared
45																																	a-1 (exponent of derivative)
60																																	ab (constant of derivative in RSD/sec)
90																																	t_minimal (time threshold is reached in sec)
120																																	RSD at t_minimal
300
600
1800
mol%	Maps
																																		C	O	Cl	Br	Rh	Na	Mg	Al	Si	P	S	K	Ca	Ti	Cr	Mn
STDEV																																	lower limit	0	0	0	0	0	0	0	0	0	0	0	0	0	0	0	0
Time (s)	C	O	Cl	Br	Rh	Na	Mg	Al	Si	P	S	K	Ca	Ti	Cr	Mn	Fe	Ni	Cu	Zn	Rb	Sr	Ba	Pb									upper limit	0	0	0	0	0	0	0	0	0	0	0	0	0	0	0	0
300																																	col_out	0	0	0	0	0	0	0	0	0	0	0	0	0	0	0	0
600																																	col_in	0	0	0	0	0	0	0	0	0	0	0	0	0	0	0	0
1800																																	dt/dc	INF	INF	INF	INF	INF	INF	INF	INF	INF	INF	INF	INF	INF	INF	INF	INF
																																	t confident	0	0	0	0	0	0	0	0	0	0	0	0	0	0	0	0
MEAN
300																																		C	O	Cl	Br	Rh	Na	Mg	Al	Si	P	S	K	Ca	Ti	Cr	Mn
600																																	a (exponent)
1800																																	b (constant in RSD)
																																	Rsquared
Coefficient of variation (RSD)																																	a-1 (exponent of derivative)
300																																	ab (constant of derivative in RSD/sec)
600																																	t_minimal (time threshold is reached in sec)
1800																																	RSD at t_minimal
ARTAX deconvolution				Same spot measurements
MEAN RSD's (ARTAX)
Time (s)	C	O	Cl	Br	Rh	Na	Mg	Al	Si	P	S	K	Ca	Ti	Cr	Mn	Fe	Ni	Cu	Zn	Rb	Sr	Ba	Pb									LLD	C	O	Cl	Br	Rh	Na	Mg	Al	Si	P	S	K	Ca	Ti	Cr	Mn
3																																	t before	-INF	-INF	-INF	-INF	-INF	-INF	-INF	-INF	-INF	-INF	-INF	-INF	-INF	-INF	-INF	-INF
10																																	t after	INF	INF	INF	INF	INF	INF	INF	INF	INF	INF	INF	INF	INF	INF	INF	INF
30																																	D	0	0	0	0	0	0	0	0	0	0	0	0	0	0	0	0
60																																	Dt	0	0	0	0	0	0	0	0	0	0	0	0	0	0	0	0
120																																	t LLD	INF	INF	INF	INF	INF	INF	INF	INF	INF	INF	INF	INF	INF	INF	INF	INF
300
600																																	LLQ
1800																																	t before	-INF	-INF	-INF	-INF	-INF	-INF	-INF	-INF	-INF	-INF	-INF	-INF	-INF	-INF	-INF	-INF
																																	t after	INF	INF	INF	INF	INF	INF	INF	INF	INF	INF	INF	INF	INF	INF	INF	INF
MEAN signal/noise (ARTAX)																																	D	0	0	0	0	0	0	0	0	0	0	0	0	0	0	0	0
Time (s)	C	O	Cl	Br	Rh	Na	Mg	Al	Si	P	S	K	Ca	Ti	Cr	Mn	Fe	Ni	Cu	Zn	Rb	Sr	Ba	Pb									Dt	0	0	0	0	0	0	0	0	0	0	0	0	0	0	0	0
3																																	t LLQ	INF	INF	INF	INF	INF	INF	INF	INF	INF	INF	INF	INF	INF	INF	INF	INF
10
30
60
120
300
600
1800
ARTAX deconvolution				Different spot measurements
MEAN RSD's (ARTAX)
Time (s)	C	O	Cl	Br	Rh	Na	Mg	Al	Si	P	S	K	Ca	Ti	Cr	Mn	Fe	Ni	Cu	Zn	Rb	Sr	Ba	Pb									LLD	C	O	Cl	Br	Rh	Na	Mg	Al	Si	P	S	K	Ca	Ti	Cr	Mn
3			13.8631	0.212262	4.22387	18.0333	0.0823682	0.594309	0.278517	0.175522	2.99365	18.8802	0.00252509	3.03523	6.23931	-0.327182	0.0567905	0.068205	13.1316	0.0140174	14.2477	0.0752505	1.47566	1.50864									t before	-INF	-INF	1	-INF	2	8	-INF	2	-INF	-INF	6	4	-INF	1	1	-INF
10			25.5243	0.112138	0.511557	32.7667	0.0467636	0.454579	0.245965	0.161953	6.34203	37.4912	0.00138262	4.26093	15.1267	0.265799	0.0308273	0.0367219	21.1983	-0.104067	-8.4508	0.0418089	-0.834406	0.949535									t after	INF	INF	INF	1	3	INF	1	3	1	1	7	6	1	INF	INF	2
30			46.4778	0.0681701	0.325279	53.1333	0.0283967	0.275084	0.162356	0.0970527	14.3664	33.2712	0.000845808	5.62581	19.9865	0.122076	0.0187756	0.0220845	29.5692	0.114203	16.2305	0.025104	0.932529	0.576593									D	0	0	0	0	-0.186278	0	0	-0.179494	0	0	-0.23157	-0.253563	0	0	0	0
60			62.6444	0.0418238	0.63409	74.0616	0.0189109	0.156399	0.0994796	0.0676404	19.2517	0.373279	0.00056432	5.82972	26.7866	0.0787419	0.0123571	0.0146641	14.5383	3.05425	15.8994	0.0166258	-1.77831	0.357105									Dt	0	0	0	0	20	0	0	20	0	0	300	240	0	0	0	0
120			104.638	0.0290476	2.80824	95.9213	0.0133051	0.107038	0.0669243	0.0456349	12.1388	5.14895	0.000399003	11.974	37.7553	0.0521292	0.00858953	0.0102192	10.7555	0.239239	20.0415	0.0115545	0.381747	0.265222									t LLD	INF	INF	INF	0	29.4931	INF	0	23.8811	0	0	536.743	100.964	0	INF	INF	0
300			173.5	0.0180538	1.26114	127.568	0.00841411	0.065073	0.0411828	0.0289117	0.512742	0.119716	0.000252542	18.2847	46.6496	0.0328352	0.00543818	0.00641912	0.114459	0.132989	30.4071	0.00728747	0.359311	0.168652
600			244.867	0.0124192	0.768435	121.956	0.00594266	0.0458789	0.0289124	0.0201638	0.281172	0.0809404	0.000178499	30.785	66.726	0.0226344	0.00384134	0.00452119	0.0725284	0.0938222	0.186101	0.00513324	0.167141	0.114326									LLQ
1800			453.933	0.00703613	0.308852	0.361802	0.00342798	0.0256903	0.0163805	0.011595	0.142502	0.0429659	0.000103113	52.8062	69.4145	0.0127131	0.00221117	0.00260405	0.0388041	0.0444135	71.2471	0.00294615	0.0858951	0.0654633									t before	-INF	-INF	1	2	8	8	-INF	5	3	2	8	6	-INF	1	1	3
																																	t after	INF	INF	INF	3	INF	INF	1	6	4	3	INF	7	1	INF	INF	4
MEAN signal/noise (ARTAX)																																	D	0	0	0	-0.0439676	0	0	0	-0.0419654	-0.0628765	-0.0649	0	-0.0387758	0	0	0	-0.0433343
Time (s)	C	O	Cl	Br	Rh	Na	Mg	Al	Si	P	S	K	Ca	Ti	Cr	Mn	Fe	Ni	Cu	Zn	Rb	Sr	Ba	Pb									Dt	0	0	0	20	0	0	0	180	30	20	0	300	0	0	0	30
3			1.01346	1.11444	1.04549	1.00625	3.08181	1.29777	1.85716	2.81714	1.25169	1.02997	177.779	1.08262	1.17181	1.29157	2.98359	1.81224	1.03301	1.06538	1.01017	1.37826	1.21024	1.11953									t LLQ	INF	INF	INF	15.5212	INF	INF	0	150.189	59.7517	29.0917	INF	452.54	0	INF	INF	45.2832
10			1.00446	1.11622	1.02494	1.00189	2.9212	1.17973	1.38252	1.50857	1.06859	1.01629	184.327	1.05077	1.13335	1.28202	2.95871	1.84416	1.0362	1.06186	1.00596	1.36778	1.07656	1.08419
30			1.00076	1.11809	1.02508	1.00072	2.92958	1.17165	1.35573	1.48297	1.03446	1.03126	186.806	1.01666	1.16488	1.30437	2.97187	1.85958	1.04217	1.07286	1.00477	1.37688	1.09401	1.07563
60			1.00024	1.12733	1.02748	1.00143	2.93375	1.18973	1.36454	1.44691	1.03193	1.05427	188.335	1.02426	1.15376	1.31796	3.01854	1.86784	1.04706	1.07344	1.005	1.37845	1.09496	1.07553
120			1.00015	1.1301	1.02927	1.00181	2.95275	1.1946	1.38269	1.46755	1.03503	1.06072	189.39	1.02573	1.16602	1.33468	3.05514	1.88198	1.05128	1.07749	1.00612	1.38468	1.09512	1.07346
300			1.00005	1.13218	1.03178	1.00296	2.96181	1.20392	1.38669	1.46286	1.03645	1.07096	190.612	1.02508	1.1738	1.33702	3.07115	1.89464	1.05444	1.07939	1.00641	1.38725	1.11166	1.07144
600			1.00003	1.13604	1.03164	1.00565	2.96419	1.20402	1.39271	1.47116	1.03422	1.07391	191.051	1.0215	1.17268	1.34366	3.07763	1.89694	1.05719	1.08035	1.00741	1.38775	1.12019	1.07418
1800			1.00001	1.13865	1.03521	1.01449	2.97317	1.21033	1.39945	1.47462	1.03683	1.07994	191.5	1.0237	1.17592	1.35479	3.09405	1.90208	1.05957	1.08342	1.00748	1.39104	1.13018	1.07504
ARTAX deconvolution				pXRF measurements
MEAN RSD's (ARTAX)
Time (s)	C	O	Cl	Br	Rh	Na	Mg	Al	Si	P	S	K	Ca	Ti	Cr	Mn	Fe	Ni	Cu	Zn	Rb	Sr	Ba	Pb									LLD	C	O	Cl	Br	Rh	Na	Mg	Al	Si	P	S	K	Ca	Ti	Cr	Mn
3																																	t before	-INF	-INF	-INF	-INF	-INF	-INF	-INF	-INF	-INF	-INF	-INF	-INF	-INF	-INF	-INF	-INF
10																																	t after	INF	INF	INF	INF	INF	INF	INF	INF	INF	INF	INF	INF	INF	INF	INF	INF
30																																	D	0	0	0	0	0	0	0	0	0	0	0	0	0	0	0	0
45																																	Dt	0	0	0	0	0	0	0	0	0	0	0	0	0	0	0	0
60																																	t LLD	INF	INF	INF	INF	INF	INF	INF	INF	INF	INF	INF	INF	INF	INF	INF	INF
90
120																																	LLQ
																																	t before	-INF	-INF	-INF	-INF	-INF	-INF	-INF	-INF	-INF	-INF	-INF	-INF	-INF	-INF	-INF	-INF
MEAN signal/noise (ARTAX)																																	t after	INF	INF	INF	INF	INF	INF	INF	INF	INF	INF	INF	INF	INF	INF	INF	INF
Time (s)	C	O	Cl	Br	Rh	Na	Mg	Al	Si	P	S	K	Ca	Ti	Cr	Mn	Fe	Ni	Cu	Zn	Rb	Sr	Ba	Pb									D	0	0	0	0	0	0	0	0	0	0	0	0	0	0	0	0
3																																	Dt	0	0	0	0	0	0	0	0	0	0	0	0	0	0	0	0
10																																	t LLQ	INF	INF	INF	INF	INF	INF	INF	INF	INF	INF	INF	INF	INF	INF	INF	INF
30
45
60
90
120
ARTAX deconvolution				maps																													LLD	C	O	Cl	Br	Rh	Na	Mg	Al	Si	P	S	K	Ca	Ti	Cr	Mn
																																	t before	-INF	-INF	-INF	-INF	-INF	-INF	-INF	-INF	-INF	-INF	-INF	-INF	-INF	-INF	-INF	-INF
MEAN RSD's (ARTAX)																																	t after	INF	INF	INF	INF	INF	INF	INF	INF	INF	INF	INF	INF	INF	INF	INF	INF
Time (s)	C	O	Cl	Br	Rh	Na	Mg	Al	Si	P	S	K	Ca	Ti	Cr	Mn	Fe	Ni	Cu	Zn	Rb	Sr	Ba	Pb									D	0	0	0	0	0	0	0	0	0	0	0	0	0	0	0	0
300																																	Dt	0	0	0	0	0	0	0	0	0	0	0	0	0	0	0	0
600																																	t LLD	INF	INF	INF	INF	INF	INF	INF	INF	INF	INF	INF	INF	INF	INF	INF	INF
1800
																																	LLQ
MEAN signal/noise (ARTAX)																																	t before	-INF	-INF	-INF	-INF	-INF	-INF	-INF	-INF	-INF	-INF	-INF	-INF	-INF	-INF	-INF	-INF
Time (s)	C	O	Cl	Br	Rh	Na	Mg	Al	Si	P	S	K	Ca	Ti	Cr	Mn	Fe	Ni	Cu	Zn	Rb	Sr	Ba	Pb									t after	INF	INF	INF	INF	INF	INF	INF	INF	INF	INF	INF	INF	INF	INF	INF	INF
300																																	D	0	0	0	0	0	0	0	0	0	0	0	0	0	0	0	0
600																																	Dt	0	0	0	0	0	0	0	0	0	0	0	0	0	0	0	0
1800																																	t LLQ	INF	INF	INF	INF	INF	INF	INF	INF	INF	INF	INF	INF	INF	INF	INF	INF
mol%	Average spot measurements					ESPRIT
STDEV
Time (s)	C	O	Cl	Br	Rh	Na	Mg	Al	Si	P	S	K	Ca	Ti	Cr	Mn	Fe	Ni	Cu	Zn	Rb	Sr	Ba	Pb
3	0.000478742	0.0016411	4.55013e-06	2.20954e-06	0	0	0.0050897	0.000107449	0.00150057	1.39761e-05	8.63422e-05	0	0.0075623	4.13562e-05	3.75956e-06	2.19243e-06	2.01494e-05	4.45055e-06	1.80182e-07	2.40446e-06	0	2.76948e-05	5.02747e-06	3.91981e-06	0	0	0	0	0	0	0
10	0.000399319	0.000578283	1.11028e-05	1.45583e-06	0	4.37159e-06	0.0017765	7.76901e-05	0.00148638	7.9792e-06	5.82022e-05	0	0.00280417	3.32071e-05	4.02646e-06	1.94686e-06	1.4544e-05	5.07029e-06	4.33168e-07	2.96702e-06	0	2.35491e-05	8.35435e-06	4.16504e-06	0	0	0	0	0	0	0
30	0.000421737	0.000650494	0	1.26975e-06	0	0	0.00217208	8.09636e-05	0.00135833	5.25926e-06	5.1615e-05	0	0.00291175	2.80578e-05	4.55568e-06	2.20316e-06	1.48304e-05	4.81679e-06	8.45602e-07	3.16651e-06	2.04395e-08	2.50057e-05	7.70029e-06	5.58382e-06	0	0	0	0	0	0	0
60	0.000366209	0.000616798	0	1.16478e-06	0	0.000125103	0.00197164	5.3575e-05	0.00132878	2.91671e-06	3.56876e-05	0	0.00291454	2.37497e-05	4.49025e-06	1.89751e-06	1.38221e-05	4.73415e-06	7.02329e-07	3.09061e-06	3.82262e-08	2.49908e-05	9.45256e-06	5.44029e-06	0	0	0	0	0	0	0
120	0.000388877	0.000644277	0	1.28341e-06	0	7.38388e-05	0.00207578	3.64704e-05	0.00133657	2.21575e-06	2.71167e-05	8.59504e-07	0.00290501	2.60394e-05	4.74921e-06	1.71551e-06	1.37679e-05	4.71158e-06	9.56459e-07	3.22014e-06	1.05862e-07	2.43136e-05	9.06554e-06	5.15926e-06	0	0	0	0	0	0	0
300	0.000382269	0.000577812	0	1.15543e-06	0	0.000250187	0.0018237	3.36902e-05	0.00135117	1.94083e-06	1.86198e-05	6.44361e-07	0.00259701	2.47912e-05	4.68234e-06	1.87952e-06	1.38309e-05	4.86851e-06	8.31129e-07	3.34487e-06	3.23072e-07	2.35357e-05	9.98158e-06	5.42956e-06	0	0	0	0	0	0	0
600	0.000374968	0.000564461	0	1.15239e-06	0	0.000201318	0.00181234	3.85155e-05	0.00135971	2.22857e-06	1.65691e-05	9.1588e-07	0.00258624	2.69808e-05	4.67312e-06	1.99124e-06	1.41131e-05	4.7461e-06	8.85942e-07	3.27904e-06	3.90929e-07	2.3989e-05	9.71543e-06	5.48557e-06	0	0	0	0	0	0	0
1800	0.000379858	0.000564642	0	1.21482e-06	0	0.000369056	0.00179606	3.27846e-05	0.00134195	1.79825e-06	1.29253e-05	1.36067e-06	0.00254296	2.57325e-05	4.63979e-06	1.92028e-06	1.35782e-05	4.78816e-06	9.23557e-07	3.39976e-06	4.6356e-07	2.44165e-05	1.03777e-05	5.42259e-06	0	0	0	0	0	0	0
MEAN
Time (s)																																		C	O	Cl	Br	Rh	Na	Mg	Al	Si	P	S	K	Ca	Ti	Cr	Mn
3	0.12775	0.51641	4.05697e-06	5.54484e-06	0	0	0.116981	0.000190069	0.00439239	5.8847e-05	0.000277694	0	0.233314	0.000129219	6.06111e-06	8.42318e-06	0.000281483	2.03514e-05	1.54916e-07	3.40862e-06	0	0.000153976	5.36826e-06	7.67426e-06	0	0	0	0	0	0	0		lower limit	0.127424	0.522559	0	2.03851e-05	0	0.000308059	0.136697	0.00124979	0.00546766	7.01783e-05	0.000179233	0	0.191229	2.21307e-05	0	1.63187e-05
10	0.128344	0.52049	1.32374e-05	1.13904e-05	0	3.50939e-06	0.129729	0.000361048	0.00595789	4.04414e-05	0.000153778	0	0.214269	8.46135e-05	5.61238e-06	1.28308e-05	0.00029065	2.8635e-05	3.70789e-07	5.44691e-06	0	0.000168791	9.21608e-06	2.13108e-05	0	0	0	0	0	0	0		upper limit	0.128943	0.524818	0	2.52444e-05	0	0.00178428	0.143881	0.00138093	0.0108355	7.73713e-05	0.000230934	3.59714e-06	0.2014	0.000125061	1.82799e-05	2.39999e-05
30	0.128502	0.52199	0	1.50306e-05	0	0	0.134409	0.000719269	0.00644874	5.8003e-05	0.000133139	0	0.207078	7.19698e-05	7.71483e-06	1.6259e-05	0.000292116	3.05282e-05	9.89035e-07	8.39817e-06	1.64083e-08	0.000175631	1.01746e-05	3.21947e-05	0	0	0	0	0	0	0		col_out	0	3	2	5	0	5	3	6	1	6	6	0	4	1	0	3
60	0.128437	0.522881	0	1.8098e-05	0	0.000151258	0.137197	0.000991693	0.00722494	5.27018e-05	0.000117235	0	0.202263	7.41393e-05	7.60737e-06	1.71185e-05	0.00029526	3.39535e-05	9.98735e-07	8.76755e-06	2.65757e-08	0.000176994	1.29458e-05	3.87377e-05	0	0	0	0	0	0	0		col_in	0	4	0	6	0	6	4	7	2	7	7	0	5	2	0	4
120	0.128422	0.523327	0	1.96951e-05	0	7.96314e-05	0.138433	0.00108026	0.00759322	6.2339e-05	0.000128849	5.5322e-07	0.200173	7.27429e-05	7.959e-06	1.82977e-05	0.000297824	3.43074e-05	1.60934e-06	1.01729e-05	1.17275e-07	0.000179999	1.53527e-05	4.21467e-05	0	0	0	0	0	0	0		dt/dc	INF	33650.3	-8.30976e+06	1.26143e+08	INF	682500	10762.8	9.83457e+06	4471.42	5.60031e+07	1.75861e+07	INF	-28717.4	-156932	INF	3.49055e+07
300	0.128305	0.523476	0	2.1122e-05	0	0.000343368	0.139044	0.00122276	0.00788812	6.57755e-05	0.000166375	4.14743e-07	0.198773	7.2618e-05	8.53651e-06	1.9086e-05	0.000299874	3.62634e-05	1.74358e-06	1.10847e-05	3.98126e-07	0.000181871	1.65301e-05	4.58239e-05	0	0	0	0	0	0	0		t confident	0	49.1623	120	207.037	0	275.902	54.6192	565.899	7.80798	546.568	526.126	0	84.7586	3.65257	0	32.0857
600	0.128316	0.523784	0	2.19029e-05	0	0.000409629	0.140031	0.00125326	0.00804583	7.11324e-05	0.000183434	5.89506e-07	0.197182	7.40469e-05	8.6924e-06	1.97056e-05	0.000299707	3.65783e-05	2.18663e-06	1.14621e-05	6.49644e-07	0.000181802	1.8092e-05	4.83551e-05	0	0	0	0	0	0	0
1800	0.128183	0.523689	0	2.28147e-05	0	0.00104617	0.140289	0.00131536	0.00815156	7.37748e-05	0.000205084	8.75796e-07	0.196314	7.35956e-05	9.00028e-06	2.01593e-05	0.000299458	3.7454e-05	2.53282e-06	1.23057e-05	7.37993e-07	0.000183428	1.95604e-05	5.08692e-05	0	0	0	0	0	0	0
Coefficient of variation (RSD)
Time (s)	C	O	Cl	Br	Rh	Na	Mg	Al	Si	P	S	K	Ca	Ti	Cr	Mn	Fe	Ni	Cu	Zn	Rb	Sr	Ba	Pb										C	O	Cl	Br	Rh	Na	Mg	Al	Si	P	S	K	Ca	Ti	Cr	Mn
3	0.0037475	0.0031779	1.12156	0.398485	0	0	0.0435086	0.565316	0.34163	0.237499	0.310926	0	0.0324125	0.320048	0.620275	0.260286	0.071583	0.218685	1.16309	0.705406	0	0.179864	0.936516	0.510773									a (exponent)	-0.0309204	-0.117506		-0.281323			-0.136809	-0.502524	-0.108417	-0.397437	-0.298032		-0.0973467	0.000856768	-0.0399278	-0.143324
10	0.00311133	0.00111104	0.838738	0.127812	0	1.24568	0.0136939	0.215179	0.249481	0.197303	0.378483	0	0.0130872	0.392456	0.717425	0.151733	0.0500397	0.177066	1.16823	0.544716	0	0.139516	0.906497	0.195443									b (constant in RSD)	0.00355266	0.00218398		0.294461			0.0294297	0.634892	0.325798	0.351207	0.715422		0.0232664	0.352235	0.699853	0.231605
30	0.00328194	0.00124618	0	0.0844779	0	0	0.0161602	0.112564	0.210635	0.0906722	0.387678	0	0.0140611	0.389856	0.590509	0.135504	0.0507691	0.157782	0.854978	0.377048	1.24568	0.142376	0.756815	0.173439									Rsquared	0.564364	0.469839		0.752691			0.506815	0.886469	0.828914	0.914059	0.805306		0.445239	0.000549293	0.696374	0.765743
60	0.00285127	0.00117961	0	0.0643597	0	0.827083	0.0143709	0.0540238	0.183916	0.0553437	0.30441	0	0.0144097	0.320339	0.590249	0.110846	0.0468134	0.13943	0.703218	0.352505	1.43839	0.141196	0.730163	0.140439									a-1 (exponent of derivative)	-1.03092	-1.11751		-1.28132			-1.13681	-1.50252	-1.10842	-1.39744	-1.29803		-1.09735	-0.999143	-1.03993	-1.14332
120	0.00302812	0.00123112	0	0.0651639	0	0.927257	0.0149949	0.0337608	0.176021	0.0355436	0.210453	1.55364	0.0145125	0.357964	0.596709	0.0937557	0.0462281	0.137334	0.594319	0.316541	0.902678	0.135076	0.590483	0.122412									ab (constant of derivative in RSD/sec)	-0.00010985	-0.000256631		-0.0828387			-0.00402625	-0.319048	-0.0353221	-0.139583	-0.213219		-0.00226491	0.000301784	-0.0279436	-0.0331947
300	0.00297939	0.0011038	0	0.0547026	0	0.728628	0.013116	0.0275527	0.171291	0.0295068	0.111915	1.55364	0.0130652	0.341392	0.548508	0.0984763	0.0461224	0.134254	0.47668	0.301756	0.811481	0.129409	0.603845	0.118487									t_minimal (time threshold is reached in sec)	1.09541	2.32418		189.459			25.8083	214.774	198.983	178.003	366.874		17.1729	3.0207	225.091	160.337
600	0.00292223	0.00107766	0	0.0526136	0	0.491464	0.0129424	0.0307323	0.168996	0.0313299	0.0903278	1.55364	0.013116	0.364374	0.53761	0.10105	0.0470898	0.129752	0.405163	0.286076	0.601759	0.131951	0.537003	0.113443									RSD at t_minimal	0.00354266	0.00197793		0.0673456			0.0188645	0.042739	0.183535	0.0447877	0.123099		0.0176409	0.352569	0.563745	0.11187
1800	0.0029634	0.0010782	0	0.0532473	0	0.352769	0.0128026	0.0249244	0.164625	0.0243748	0.0630247	1.55364	0.0129535	0.349646	0.515516	0.0952552	0.0453425	0.127841	0.364636	0.276276	0.628136	0.133112	0.530545	0.106599
ARTAX deconvolution				Average spot measurements
MEAN RSD's (ARTAX)
Time (s)	C	O	Cl	Br	Rh	Na	Mg	Al	Si	P	S	K	Ca	Ti	Cr	Mn	Fe	Ni	Cu	Zn	Rb	Sr	Ba	Pb									LLD	C	O	Cl	Br	Rh	Na	Mg	Al	Si	P	S	K	Ca	Ti	Cr	Mn
3			14.0374	0.213706	4.16812	17.9633	0.0822825	0.604234	0.283653	0.17749	2.86728	18.9812	0.00252651	2.64019	6.30181	-0.329278	0.0571279	0.0679096	13.7564	-0.00412222	14.9944	0.075267	1.64471	1.52551									t before	-INF	-INF	1	-INF	4	8	-INF	2	-INF	-INF	6	4	-INF	1	1	-INF
10			25.5812	0.112048	1.12916	32.8067	0.0467612	0.449523	0.248269	0.161727	6.53579	37.1467	0.00138339	3.94577	14.7254	0.270218	0.0310561	0.0367448	21.838	-0.0865616	-9.84421	0.0421566	-0.629926	0.944941									t after	INF	INF	INF	1	8	INF	1	3	1	1	7	6	1	INF	INF	2
30			45.6767	0.0689549	1.14802	53.0533	0.0283638	0.277016	0.162574	0.0962046	15.0086	31.935	0.000846247	5.18893	19.1723	0.121862	0.0189183	0.0220925	33.398	0.249851	24.8119	0.0251704	1.31502	0.578402									D	0	0	0	0	-0.0939162	0	0	-0.172507	0	0	-0.238947	-0.25627	0	0	0	0
60			63.4806	0.0419467	0.405959	73.7103	0.0189146	0.156245	0.100049	0.0675877	21.5977	0.377677	0.000564636	5.72403	26.1462	0.0782812	0.0124252	0.0146541	16.5844	3.25438	15.5721	0.016687	-1.33165	0.358755									Dt	0	0	0	0	1740	0	0	20	0	0	300	240	0	0	0	0
120			106.091	0.0292587	4.40394	94.9961	0.0133162	0.107877	0.0676111	0.0457532	14.4468	5.64187	0.00039923	11.1944	38.5063	0.0515737	0.0086297	0.0102131	10.7593	0.222712	19.9011	0.0115796	0.358864	0.265499									t LLD	INF	INF	INF	0	1467.3	INF	0	23.8572	0	0	542.255	104.65	0	INF	INF	0
300			177.14	0.0181584	1.20226	130.37	0.0084218	0.0658233	0.0415238	0.0290188	0.522953	0.121406	0.000252666	18.5596	47.7763	0.0326148	0.00546588	0.00641804	0.117996	0.128834	18.7482	0.00732191	0.346374	0.167573
600			243.873	0.0125082	0.765926	126.092	0.00594628	0.0461274	0.0290909	0.0201643	0.284006	0.0816651	0.000178589	30.7133	68.2389	0.022469	0.00385912	0.00451806	0.0742281	0.0893922	0.507345	0.00515173	0.167225	0.113701									LLQ
1800			453.77	0.00707566	0.312043	0.360848	0.00343031	0.0257959	0.0164686	0.0115993	0.146536	0.0432963	0.000103162	51.8876	72.9464	0.0126182	0.00222189	0.0026023	0.0394389	0.0432163	42.8649	0.00295482	0.0861073	0.0648071									t before	-INF	-INF	1	2	8	8	-INF	5	4	2	8	6	-INF	1	1	3
																																	t after	INF	INF	INF	3	INF	INF	1	6	5	3	INF	7	1	INF	INF	4
MEAN signal/noise (ARTAX)																																	D	0	0	0	-0.0430931	0	0	0	-0.0420535	-0.0324379	-0.065522	0	-0.0397411	0	0	0	-0.0435809
Time (s)	C	O	Cl	Br	Rh	Na	Mg	Al	Si	P	S	K	Ca	Ti	Cr	Mn	Fe	Ni	Cu	Zn	Rb	Sr	Ba	Pb									Dt	0	0	0	20	0	0	0	180	60	20	0	300	0	0	0	30
3			1.01312	1.11375	1.04728	1.0063	3.08307	1.29501	1.82835	2.82909	1.24349	1.02724	177.578	1.08363	1.17117	1.29596	2.97875	1.82097	1.03313	1.06851	1.01039	1.38456	1.20795	1.12047									t LLQ	INF	INF	INF	15.5916	INF	INF	0	153.715	60.0906	28.8415	INF	461.592	0	INF	INF	45.0493
10			1.00409	1.11654	1.02692	1.00189	2.9232	1.18305	1.38262	1.50598	1.06797	1.0169	184.461	1.05921	1.13449	1.28883	2.94173	1.84864	1.03373	1.06497	1.00523	1.37141	1.07732	1.08439
30			1.00073	1.11675	1.02663	1.00072	2.93554	1.17018	1.35226	1.48672	1.03149	1.03206	186.892	1.01936	1.16542	1.31043	2.958	1.8637	1.0392	1.07536	1.00463	1.38193	1.0929	1.07612
60			1.00024	1.12697	1.02925	1.00135	2.93283	1.18929	1.36263	1.4485	1.0318	1.05348	188.337	1.0266	1.15394	1.326	3.01025	1.87402	1.04519	1.07588	1.0049	1.38359	1.09337	1.07533
120			1.00016	1.12926	1.0302	1.00185	2.95288	1.19328	1.37983	1.46633	1.0341	1.06005	189.443	1.02861	1.16617	1.34351	3.0492	1.88729	1.04957	1.08035	1.00607	1.38984	1.09647	1.07336
300			1.00006	1.13143	1.03296	1.00262	2.95994	1.20087	1.3838	1.46105	1.03452	1.06977	190.684	1.02763	1.17527	1.34417	3.06373	1.89948	1.05255	1.08158	1.00613	1.39075	1.11137	1.07168
600			1.00003	1.1351	1.03314	1.00533	2.96349	1.20256	1.39086	1.47146	1.03358	1.07306	191.07	1.02362	1.17358	1.35123	3.07188	1.90199	1.05548	1.08331	1.00714	1.39229	1.11929	1.07439
1800			1.00001	1.13791	1.0367	1.01445	2.97248	1.20921	1.39757	1.47447	1.03592	1.07916	191.557	1.02639	1.17643	1.36268	3.08772	1.90738	1.05798	1.08593	1.00724	1.39628	1.1299	1.07566
STANDARD VALUES
mol%	Average spot measurements					ESPRIT
STDEV
Time (s)	C	O	Cl	Br	Rh	Na	Mg	Al	Si	P	S	K	Ca	Ti	Cr	Mn	Fe	Ni	Cu	Zn	Rb	Sr	Ba	Pb
3	0.000511241	0	#DIV/0!	0	0	0.000243715	0.00131718	0.000803303	0.000118324	3.7832e-06	3.09394e-05	2.76011e-05	0.00176943	2.7422e-06	1.97497e-06	8.40405e-05	2.80077e-05	#DIV/0!	0	3.18719e-05	0	3.94572e-05	6.54414e-05	2.45735e-06	0	0	0	0	0	0	0
10	0.000511241	0	#DIV/0!	0	0	0.000243715	0.00131718	0.000803303	0.000118324	3.7832e-06	3.09394e-05	2.76011e-05	0.00176943	2.7422e-06	1.97497e-06	8.40405e-05	2.80077e-05	#DIV/0!	0	3.18719e-05	0	3.94572e-05	6.54414e-05	2.45735e-06	0	0	0	0	0	0	0
30	0.000511241	0	#DIV/0!	0	0	0.000243715	0.00131718	0.000803303	0.000118324	3.7832e-06	3.09394e-05	2.76011e-05	0.00176943	2.7422e-06	1.97497e-06	8.40405e-05	2.80077e-05	#DIV/0!	0	3.18719e-05	0	3.94572e-05	6.54414e-05	2.45735e-06	0	0	0	0	0	0	0
60	0.000511241	0	#DIV/0!	0	0	0.000243715	0.00131718	0.000803303	0.000118324	3.7832e-06	3.09394e-05	2.76011e-05	0.00176943	2.7422e-06	1.97497e-06	8.40405e-05	2.80077e-05	#DIV/0!	0	3.18719e-05	0	3.94572e-05	6.54414e-05	2.45735e-06	0	0	0	0	0	0	0
120	0.000511241	0	#DIV/0!	0	0	0.000243715	0.00131718	0.000803303	0.000118324	3.7832e-06	3.09394e-05	2.76011e-05	0.00176943	2.7422e-06	1.97497e-06	8.40405e-05	2.80077e-05	#DIV/0!	0	3.18719e-05	0	3.94572e-05	6.54414e-05	2.45735e-06	0	0	0	0	0	0	0
300	0.000511241	0	#DIV/0!	0	0	0.000243715	0.00131718	0.000803303	0.000118324	3.7832e-06	3.09394e-05	2.76011e-05	0.00176943	2.7422e-06	1.97497e-06	8.40405e-05	2.80077e-05	#DIV/0!	0	3.18719e-05	0	3.94572e-05	6.54414e-05	2.45735e-06	0	0	0	0	0	0	0
600	0.000511241	0	#DIV/0!	0	0	0.000243715	0.00131718	0.000803303	0.000118324	3.7832e-06	3.09394e-05	2.76011e-05	0.00176943	2.7422e-06	1.97497e-06	8.40405e-05	2.80077e-05	#DIV/0!	0	3.18719e-05	0	3.94572e-05	6.54414e-05	2.45735e-06	0	0	0	0	0	0	0
1800	0.000511241	0	#DIV/0!	0	0	0.000243715	0.00131718	0.000803303	0.000118324	3.7832e-06	3.09394e-05	2.76011e-05	0.00176943	2.7422e-06	1.97497e-06	8.40405e-05	2.80077e-05	#DIV/0!	0	3.18719e-05	0	3.94572e-05	6.54414e-05	2.45735e-06	0	0	0	0	0	0	0
MEAN
Time (s)
3	0.128133	0.51794	4.8154e-05	0	0	0.000690014	0.130599	0.00057953	0.001779	1.40103e-05	3.49105e-05	5.41327e-05	0.219474	1.22659e-05	4.34716e-06	5.60262e-05	0.000211592	1.00321e-05	0	2.34082e-05	0	0.000199868	0.000133431	3.00963e-06	0	0	0	0	0	0	0
10	0.128133	0.51794	4.8154e-05	0	0	0.000690014	0.130599	0.00057953	0.001779	1.40103e-05	3.49105e-05	5.41327e-05	0.219474	1.22659e-05	4.34716e-06	5.60262e-05	0.000211592	1.00321e-05	0	2.34082e-05	0	0.000199868	0.000133431	3.00963e-06	0	0	0	0	0	0	0
30	0.128133	0.51794	4.8154e-05	0	0	0.000690014	0.130599	0.00057953	0.001779	1.40103e-05	3.49105e-05	5.41327e-05	0.219474	1.22659e-05	4.34716e-06	5.60262e-05	0.000211592	1.00321e-05	0	2.34082e-05	0	0.000199868	0.000133431	3.00963e-06	0	0	0	0	0	0	0
60	0.128133	0.51794	4.8154e-05	0	0	0.000690014	0.130599	0.00057953	0.001779	1.40103e-05	3.49105e-05	5.41327e-05	0.219474	1.22659e-05	4.34716e-06	5.60262e-05	0.000211592	1.00321e-05	0	2.34082e-05	0	0.000199868	0.000133431	3.00963e-06	0	0	0	0	0	0	0
120	0.128133	0.51794	4.8154e-05	0	0	0.000690014	0.130599	0.00057953	0.001779	1.40103e-05	3.49105e-05	5.41327e-05	0.219474	1.22659e-05	4.34716e-06	5.60262e-05	0.000211592	1.00321e-05	0	2.34082e-05	0	0.000199868	0.000133431	3.00963e-06	0	0	0	0	0	0	0
300	0.128133	0.51794	4.8154e-05	0	0	0.000690014	0.130599	0.00057953	0.001779	1.40103e-05	3.49105e-05	5.41327e-05	0.219474	1.22659e-05	4.34716e-06	5.60262e-05	0.000211592	1.00321e-05	0	2.34082e-05	0	0.000199868	0.000133431	3.00963e-06	0	0	0	0	0	0	0
600	0.128133	0.51794	4.8154e-05	0	0	0.000690014	0.130599	0.00057953	0.001779	1.40103e-05	3.49105e-05	5.41327e-05	0.219474	1.22659e-05	4.34716e-06	5.60262e-05	0.000211592	1.00321e-05	0	2.34082e-05	0	0.000199868	0.000133431	3.00963e-06	0	0	0	0	0	0	0
1800	0.128133	0.51794	4.8154e-05	0	0	0.000690014	0.130599	0.00057953	0.001779	1.40103e-05	3.49105e-05	5.41327e-05	0.219474	1.22659e-05	4.34716e-06	5.60262e-05	0.000211592	1.00321e-05	0	2.34082e-05	0	0.000199868	0.000133431	3.00963e-06	0	0	0	0	0	0	0
Coefficient of variation (RSD)
Time (s)	C	O	Cl	Br	Rh	Na	Mg	Al	Si	P	S	K	Ca	Ti	Cr	Mn	Fe	Ni	Cu	Zn	Rb	Sr	Ba	Pb
3	0.00398991	0	#DIV/0!	#DIV/0!	#DIV/0!	0.353203	0.0100857	1.38613	0.0665116	0.270031	0.886251	0.509879	0.00806214	0.223564	0.454313	1.50002	0.132367	#DIV/0!	#DIV/0!	1.36157	#DIV/0!	0.197416	0.490451	0.816497
10	0.00398991	0	#DIV/0!	#DIV/0!	#DIV/0!	0.353203	0.0100857	1.38613	0.0665116	0.270031	0.886251	0.509879	0.00806214	0.223564	0.454313	1.50002	0.132367	#DIV/0!	#DIV/0!	1.36157	#DIV/0!	0.197416	0.490451	0.816497
30	0.00398991	0	#DIV/0!	#DIV/0!	#DIV/0!	0.353203	0.0100857	1.38613	0.0665116	0.270031	0.886251	0.509879	0.00806214	0.223564	0.454313	1.50002	0.132367	#DIV/0!	#DIV/0!	1.36157	#DIV/0!	0.197416	0.490451	0.816497
60	0.00398991	0	#DIV/0!	#DIV/0!	#DIV/0!	0.353203	0.0100857	1.38613	0.0665116	0.270031	0.886251	0.509879	0.00806214	0.223564	0.454313	1.50002	0.132367	#DIV/0!	#DIV/0!	1.36157	#DIV/0!	0.197416	0.490451	0.816497
120	0.00398991	0	#DIV/0!	#DIV/0!	#DIV/0!	0.353203	0.0100857	1.38613	0.0665116	0.270031	0.886251	0.509879	0.00806214	0.223564	0.454313	1.50002	0.132367	#DIV/0!	#DIV/0!	1.36157	#DIV/0!	0.197416	0.490451	0.816497
300	0.00398991	0	#DIV/0!	#DIV/0!	#DIV/0!	0.353203	0.0100857	1.38613	0.0665116	0.270031	0.886251	0.509879	0.00806214	0.223564	0.454313	1.50002	0.132367	#DIV/0!	#DIV/0!	1.36157	#DIV/0!	0.197416	0.490451	0.816497
600	0.00398991	0	#DIV/0!	#DIV/0!	#DIV/0!	0.353203	0.0100857	1.38613	0.0665116	0.270031	0.886251	0.509879	0.00806214	0.223564	0.454313	1.50002	0.132367	#DIV/0!	#DIV/0!	1.36157	#DIV/0!	0.197416	0.490451	0.816497
1800	0.00398991	0	#DIV/0!	#DIV/0!	#DIV/0!	0.353203	0.0100857	1.38613	0.0665116	0.270031	0.886251	0.509879	0.00806214	0.223564	0.454313	1.50002	0.132367	#DIV/0!	#DIV/0!	1.36157	#DIV/0!	0.197416	0.490451	0.816497
ICP-MS VALUES
mol%	Average spot measurements					ESPRIT
STDEV
Time (s)	C	O				Na23(MR)	Mg26(MR)	Al27(MR)	Si28(MR)	P31(MR)	S32(MR)	K39(HR)	Ca42(MR)	Ti47(MR)	Cr52(MR)	Mn55(MR)	Fe56(MR)	Ni60(MR)	Cu63(MR)	Zn66(MR)	Rb85(LR)	Sr86/88(LR)	Ba138(LR)	Pb208(LR)	Li7(LR)	B11(LR)	V51(MR)	Co59(MR)	As75(HR)	Cd114(LR)	Hg202(LR)
	0.000168442	0.000673144	0	0	0	0.000561204	0.00881315	2.68662e-05	0.000485715	1.22612e-05	0.000295885	0.000105276	0.0140505	2.46944e-05	1.28249e-07	2.60652e-07	1.032e-05	1.21591e-07	2.26265e-06	3.51708e-05	5.27922e-07	1.04874e-05	5.62345e-06	1.21895e-06	#VALUE!	#VALUE!	#VALUE!	#VALUE!	#VALUE!	#VALUE!	#VALUE!
MEAN
Time (s)
	0.128393	0.513094	0	0	0	0.00161654	0.125549	0.000167813	0.00770668	0.000140236	0.000235262	0.000115856	0.221345	2.13785e-05	1.63743e-06	2.92778e-05	0.000197565	3.18543e-06	1.22296e-05	4.77197e-05	6.11431e-07	0.000249759	6.80114e-06	2.46649e-06	4.66046e-06	0.00105772	1.62269e-06	6.90515e-08	3.9276e-07	1.47693e-07	3.20354e-07
Coefficient of variation (RSD)
Time (s)	C	O				Na23(MR)	Mg26(MR)	Al27(MR)	Si28(MR)	P31(MR)	S32(MR)	K39(HR)	Ca42(MR)	Ti47(MR)	Cr52(MR)	Mn55(MR)	Fe56(MR)	Ni60(MR)	Cu63(MR)	Zn66(MR)	Rb85(LR)	Sr86/88(LR)	Ba138(LR)	Pb208(LR)	Li7(LR)	B11(LR)	V51(MR)	Co59(MR)	As75(HR)	Cd114(LR)	Hg202(LR)
	0.00131193	0.00131193	#DIV/0!	#DIV/0!	#DIV/0!	0.347163	0.0701967	0.160096	0.0630252	0.0874328	1.25768	0.908687	0.0634779	1.1551	0.0783235	0.0089027	0.0522359	0.0381711	0.185014	0.737029	0.86342	0.0419901	0.826839	0.494204	#VALUE!	#VALUE!	#VALUE!	#VALUE!	#VALUE!	#VALUE!	#VALUE!
[truncated: 8 more columns]

## Sheet: ECRM782
Overview table of repeatability tests on M4 and Tracer																																	POWER FUNCTION FIT
Espirit quantification "Linestone 393 Point2"																																	threshold value =	0.0001	RSD/s		2	SD
	12.0107	15.9994	35.453	79.904	102.906	22.9898	24.305	26.9815	28.0855	30.9738	32.065	39.0983	40.078	47.867	51.9961	54.938	55.845	58.6934	63.546	65.38	85.4678	87.62	137.327	207.2	6.941	10.811	50.9415	58.9332	39.948	112.411	200.59
mol%	Same-spot measurements																																	12	15.9994	35.453	79.9	102.906	22.9897	24.305	26.9815	28.0855	30.9738	32.065	39.0983	40.078	47.867	51.9961	54.938
STDEV
Time (s)	C	O	Cl	Br	Rh	Na	Mg	Al	Si	P	S	K	Ca	Ti	Cr	Mn	Fe	Ni	Cu	Zn	Rb	Sr	Ba	Pb	Li7(LR)	B11(LR)	V51(MR)	Co59(MR)	As75(HR)	Cd114(LR)	Hg202(LR)
3
10
30
60
120
300
600
1800
MEAN
Time (s)	C	O	Cl	Br	Rh	Na	Mg	Al	Si	P	S	K	Ca	Ti	Cr	Mn	Fe	Ni	Cu	Zn	Rb	Sr	Ba	Pb										C	O	Cl	Br	Rh	Na	Mg	Al	Si	P	S	K	Ca	Ti	Cr	Mn
3																																	lower limit	0	0	0	0	0	0	0	0	0	0	0	0	0	0	0	0
10																																	upper limit	0	0	0	0	0	0	0	0	0	0	0	0	0	0	0	0
30																																	col_out	0	0	0	0	0	0	0	0	0	0	0	0	0	0	0	0
60																																	col_in	0	0	0	0	0	0	0	0	0	0	0	0	0	0	0	0
120																																	dt/dc	INF	INF	INF	INF	INF	INF	INF	INF	INF	INF	INF	INF	INF	INF	INF	INF
300																																	t confident	0	0	0	0	0	0	0	0	0	0	0	0	0	0	0	0
600
1800
Coefficient of variation (RSD)
Time (s)	C	O	Cl	Br	Rh	Na	Mg	Al	Si	P	S	K	Ca	Ti	Cr	Mn	Fe	Ni	Cu	Zn	Rb	Sr	Ba	Pb										C	O	Cl	Br	Rh	Na	Mg	Al	Si	P	S	K	Ca	Ti	Cr	Mn
3																																	a (exponent)
10																																	b (constant in RSD)
30																																	Rsquared
60																																	a-1 (exponent of derivative)
120																																	ab (constant of derivative in RSD/sec)
300																																	t_minimal (time threshold is reached in sec)
600																																	RSD at t_minimal
1800
mol%	Different spot measurements
STDEV
Time (s)	C	O	Cl	Br	Rh	Na	Mg	Al	Si	P	S	K	Ca	Ti	Cr	Mn	Fe	Ni	Cu	Zn	Rb	Sr	Ba	Pb
3	0.00114177	0.00437718	0.000265745	1.06624e-05	0	0	0.0137928	0.000333793	0.00109052	3.4642e-05	0.000407279	3.94821e-05	0.0191005	0.000169211	6.04677e-06	5.83688e-05	0.000569483	1.23292e-05	2.63211e-06	1.62039e-05	0	6.671e-06	1.2651e-05	2.337e-05	0	0	0	0	0	0	0
10	0.000897466	0.00372462	0.000215698	1.04867e-05	0	0.000403657	0.0118881	0.000353398	0.00157076	3.02836e-05	0.000295032	3.91508e-05	0.0169555	0.000134542	5.5232e-06	4.58243e-05	0.000480026	1.13212e-05	4.43969e-06	1.59475e-05	0	6.92575e-06	1.56452e-05	2.23019e-05	0	0	0	0	0	0	0
30	0.000874106	0.00381828	0.000170743	9.49415e-06	0	0	0.0120636	0.000309923	0.00124331	1.66808e-05	0.000194476	3.43952e-05	0.0172832	0.00013201	6.10171e-06	4.5619e-05	0.000466478	1.09544e-05	4.83608e-06	1.58035e-05	1.53374e-07	4.81783e-06	1.84831e-05	2.04164e-05	0	0	0	0	0	0	0
60	0.000946089	0.0038002	0.000172922	9.30643e-06	0	0.00101941	0.0120692	0.00018673	0.00108429	1.16432e-05	0.000163009	3.31956e-05	0.0170813	0.000124	5.38125e-06	4.4813e-05	0.000466075	1.08104e-05	5.75599e-06	1.49487e-05	0	4.74783e-06	2.02935e-05	2.08817e-05	0	0	0	0	0	0	0
120	0.000887241	0.00375898	0.000166422	9.57833e-06	0	0.000560396	0.0119622	0.000167268	0.0010387	1.03997e-05	0.000106052	3.4573e-05	0.0169616	0.000120125	6.51425e-06	4.45734e-05	0.000485216	1.05689e-05	5.65282e-06	1.53682e-05	6.45419e-07	4.85252e-06	2.28129e-05	2.12291e-05	0	0	0	0	0	0	0
300	0.000860158	0.00370827	0.000168557	9.08784e-06	0	0.00143199	0.0118142	0.000135438	0.00091086	9.43163e-06	6.97898e-05	3.40334e-05	0.0168213	0.000121122	6.73515e-06	4.31938e-05	0.000461501	1.09769e-05	6.28617e-06	1.56012e-05	1.14654e-06	4.57733e-06	2.23008e-05	2.06951e-05	0	0	0	0	0	0	0
600	0.000847613	0.00374725	0.000167127	8.90994e-06	0	0.0014101	0.0116155	0.000167997	0.000940305	8.27796e-06	6.80543e-05	3.43183e-05	0.0165318	0.000119506	6.59771e-06	4.34028e-05	0.00046254	1.0726e-05	6.44111e-06	1.55625e-05	1.52341e-06	4.75064e-06	2.31991e-05	2.13306e-05	0	0	0	0	0	0	0
1800	0.000901994	0.0037828	0.000161334	8.94281e-06	0	0.00234582	0.0116573	0.000125717	0.000888427	8.98615e-06	6.13668e-05	3.42826e-05	0.016585	0.000113342	6.79995e-06	4.2903e-05	0.000461407	1.08993e-05	6.52183e-06	1.53738e-05	1.83423e-06	4.70172e-06	2.30491e-05	2.11628e-05	0	0	0	0	0	0	0
MEAN
Time (s)																																		C	O	Cl	Br	Rh	Na	Mg	Al	Si	P	S	K	Ca	Ti	Cr	Mn
3	0.127656	0.514224	0.000778214	1.70485e-05	0	0	0.116528	0.000168777	0.000915251	5.45561e-05	0.000339241	2.68984e-05	0.233817	0.000199186	2.37117e-06	0.000577832	0.00459883	1.40798e-05	7.43688e-07	5.30349e-05	0	4.39373e-06	2.84267e-06	2.18813e-05	0	0	0	0	0	0	0		lower limit	0.125858	0.512089	0.000560053	1.72074e-05	0	-0.00291162	0.111667	0.00122981	0.00227854	6.12921e-05	0.000215709	5.51185e-05	0.17023	-8.77306e-09	-8.91996e-06	0.000494632
10	0.127842	0.516806	0.000908915	2.71222e-05	0	8.20457e-05	0.124839	0.000559085	0.00232097	5.38319e-05	0.000224597	6.00257e-05	0.220731	0.000230037	2.42739e-06	0.000582273	0.0045986	1.66805e-05	1.16642e-06	5.72174e-05	0	1.29565e-05	7.70778e-06	3.66133e-05	0	0	0	0	0	0	0		upper limit	0.129466	0.527221	0.00120539	5.29786e-05	0	0.00647166	0.158296	0.00173268	0.00583225	9.72366e-05	0.000461176	0.000192249	0.23657	0.000453358	1.82798e-05	0.000666244
30	0.128203	0.51856	0.00092529	3.21603e-05	0	0	0.130486	0.000911691	0.00242285	5.16965e-05	0.000179149	8.50892e-05	0.212622	0.000213193	3.16669e-06	0.000583365	0.00456024	2.0611e-05	1.80073e-06	6.15076e-05	2.80022e-08	1.6659e-05	8.62627e-06	5.09969e-05	0	0	0	0	0	0	0		col_out	0	0	0	1	0	0	0	5	1	3	4	1	0	0	0	0
60	0.128046	0.519253	0.000938387	3.44268e-05	0	0.000356349	0.13278	0.0011538	0.0032258	6.18628e-05	0.000211483	9.53556e-05	0.208312	0.000230035	3.30662e-06	0.000580983	0.00454259	2.15005e-05	2.22794e-06	6.27627e-05	0	2.08075e-05	1.0462e-05	5.5996e-05	0	0	0	0	0	0	0		col_in	0	0	0	2	0	0	0	6	2	4	5	2	0	0	0	0
120	0.128034	0.519617	0.000922567	3.58996e-05	0	0.000207694	0.133682	0.00122871	0.00349195	6.80082e-05	0.000260904	0.00010522	0.206785	0.000227456	3.68601e-06	0.000583699	0.0045572	2.34573e-05	2.45085e-06	6.49636e-05	1.48633e-07	2.26596e-05	1.31197e-05	6.15072e-05	0	0	0	0	0	0	0		dt/dc	INF	INF	INF	694879	INF	INF	INF	1.19351e+06	4979.64	2.95093e+06	1.21405e+06	211306	INF	INF	INF	INF
300	0.12788	0.519575	0.000889882	3.41407e-05	0	0.000620066	0.13381	0.00137952	0.00374657	7.13637e-05	0.000266064	0.000115885	0.206058	0.000228033	4.04144e-06	0.000583038	0.00453717	2.55944e-05	3.34789e-06	6.6398e-05	3.20165e-07	2.46794e-05	1.45953e-05	6.56325e-05	0	0	0	0	0	0	0		t confident	0	0	0	3.11036	0	0	0	121.314	9.7887	58.3159	65.1303	8.96307	0	0	0	0
600	0.127823	0.519773	0.000910925	3.59564e-05	0	0.000872642	0.134614	0.00142772	0.00393826	7.57008e-05	0.000313348	0.000119785	0.204543	0.00023006	4.30805e-06	0.000582593	0.00452756	2.70377e-05	3.53215e-06	6.69392e-05	6.38833e-07	2.55809e-05	1.64587e-05	6.7793e-05	0	0	0	0	0	0	0
1800	0.127662	0.519655	0.000882721	3.5093e-05	0	0.00178002	0.134981	0.00148124	0.0040554	7.92644e-05	0.000338442	0.000123684	0.2034	0.000226674	4.67994e-06	0.000580438	0.00449995	2.71796e-05	4.02013e-06	6.75079e-05	9.77615e-07	2.6428e-05	1.75191e-05	7.05182e-05	0	0	0	0	0	0	0
Coefficient of variation (RSD)
Time (s)	C	O	Cl	Br	Rh	Na	Mg	Al	Si	P	S	K	Ca	Ti	Cr	Mn	Fe	Ni	Cu	Zn	Rb	Sr	Ba	Pb										C	O	Cl	Br	Rh	Na	Mg	Al	Si	P	S	K	Ca	Ti	Cr	Mn
3	0.00894413	0.00851221	0.341481	0.625415	0	0	0.118364	1.97771	1.1915	0.634979	1.20056	1.46782	0.0816898	0.849513	2.55012	0.101013	0.123832	0.875668	3.53927	0.305533	0	1.5183	4.45039	1.06804									a (exponent)	-0.0296266	-0.0175217	-0.0812253	-0.12577			-0.040694	-0.479293	-0.269045	-0.316168	-0.363243	-0.238019	0.00337116	-0.0676014	-0.0871674	-0.0379099
10	0.00702011	0.00720701	0.237314	0.386644	0	4.9199	0.0952276	0.6321	0.676767	0.562559	1.31361	0.652233	0.0768152	0.584871	2.27536	0.0786989	0.104385	0.678707	3.80626	0.278717	0	0.53454	2.02979	0.609119									b (constant in RSD)	0.00815942	0.00799068	0.293753	0.540801			0.111233	1.94235	1.27476	0.886028	2.5921	1.20948	0.0797651	0.775796	2.66996	0.0931952
30	0.00681813	0.00736323	0.184529	0.295213	0	0	0.0924506	0.339943	0.513161	0.322667	1.08556	0.404225	0.0812862	0.619203	1.92684	0.0781997	0.102293	0.531485	2.68563	0.256935	5.47723	0.289202	2.14266	0.400345									Rsquared	0.434141	0.42052	0.595655	0.722088			0.706449	0.873293	0.914187	0.909454	0.901309	0.782518	0.109079	0.706948	0.900062	0.615863
60	0.00738867	0.00731859	0.184276	0.270325	0	2.86072	0.0908961	0.161839	0.33613	0.18821	0.770791	0.348124	0.0819984	0.53905	1.62742	0.077133	0.102601	0.502799	2.58354	0.238178	0	0.228179	1.93974	0.372914									a-1 (exponent of derivative)	-1.02963	-1.01752	-1.08123	-1.12577			-1.04069	-1.47929	-1.26904	-1.31617	-1.36324	-1.23802	-0.996629	-1.0676	-1.08717	-1.03791
120	0.0069297	0.00723414	0.18039	0.266809	0	2.69818	0.0894826	0.136134	0.297456	0.152919	0.406478	0.328579	0.0820252	0.528123	1.76729	0.0763638	0.106472	0.450561	2.30648	0.236567	4.34237	0.214148	1.73883	0.345148									ab (constant of derivative in RSD/sec)	-0.000241736	-0.000140011	-0.0238602	-0.0680165			-0.00452652	-0.930957	-0.342967	-0.280134	-0.94156	-0.287879	0.0002689	-0.0524449	-0.232734	-0.00353302
300	0.00672629	0.00713713	0.189415	0.266188	0	2.30941	0.0882904	0.0981778	0.243118	0.132163	0.262305	0.293682	0.0816338	0.531158	1.66652	0.074084	0.101716	0.42888	1.87765	0.234965	3.58108	0.185471	1.52794	0.315318									t_minimal (time threshold is reached in sec)	2.35674	1.39201	158.145	328.214			38.996	481.938	610.603	416.144	822.236	622.515	2.69802	352.768	1250	31.017
600	0.00663113	0.0072094	0.18347	0.247799	0	1.6159	0.086287	0.117668	0.238762	0.109351	0.217184	0.2865	0.080823	0.519455	1.53148	0.0744994	0.102161	0.396706	1.82357	0.232487	2.38468	0.185711	1.40954	0.314643									RSD at t_minimal	0.0079548	0.00794451	0.194699	0.260964			0.0958274	0.100552	0.226952	0.131621	0.22636	0.26154	0.0800324	0.521836	1.43402	0.0818177
1800	0.00706548	0.00727945	0.182769	0.254832	0	1.31786	0.0863621	0.0848729	0.219073	0.113369	0.181321	0.27718	0.0815389	0.500019	1.453	0.0739149	0.102536	0.401012	1.62229	0.227734	1.87623	0.177907	1.31566	0.300105
pXRF quantification Carbonate Standard
mol% pXRF spot
STDEV
Time (s)	C	O	Cl	Br	Rh	Na	Mg	Al	Si	P	S	K	Ca	Ti	Cr	Mn	Fe	Ni	Cu	Zn	Rb	Sr	Ba	Pb
3
10
30
45
60
90
120
300
600
1800
MEAN
Time (s)	C	O	Cl	Br	Rh	Na	Mg	Al	Si	P	S	K	Ca	Ti	Cr	Mn	Fe	Ni	Cu	Zn	Rb	Sr	Ba	Pb										C	O	Cl	Br	Rh	Na	Mg	Al	Si	P	S	K	Ca	Ti	Cr	Mn
3																																	lower limit	0	0	0	0	0	0	0	0	0	0	0	0	0	0	0	0
10																																	upper limit	0	0	0	0	0	0	0	0	0	0	0	0	0	0	0	0
30																																	col_out	0	0	0	0	0	0	0	0	0	0	0	0	0	0	0	0
45																																	col_in	0	0	0	0	0	0	0	0	0	0	0	0	0	0	0	0
60																																	dt/dc	INF	INF	INF	INF	INF	INF	INF	INF	INF	INF	INF	INF	INF	INF	INF	INF
90																																	t confident	0	0	0	0	0	0	0	0	0	0	0	0	0	0	0	0
120
300
600
1800
Coefficient of variation (RSD)
Time (s)	C	O	Cl	Br	Rh	Na	Mg	Al	Si	P	S	K	Ca	Ti	Cr	Mn	Fe	Ni	Cu	Zn	Rb	Sr	Ba	Pb										C	O	Cl	Br	Rh	Na	Mg	Al	Si	P	S	K	Ca	Ti	Cr	Mn
3																																	a (exponent)
10																																	b (constant in RSD)
30																																	Rsquared
45																																	a-1 (exponent of derivative)
60																																	ab (constant of derivative in RSD/sec)
90																																	t_minimal (time threshold is reached in sec)
120																																	RSD at t_minimal
300
600
1800
mol%	Maps
																																		C	O	Cl	Br	Rh	Na	Mg	Al	Si	P	S	K	Ca	Ti	Cr	Mn
STDEV																																	lower limit	0	0	0	0	0	0	0	0	0	0	0	0	0	0	0	0
Time (s)	C	O	Cl	Br	Rh	Na	Mg	Al	Si	P	S	K	Ca	Ti	Cr	Mn	Fe	Ni	Cu	Zn	Rb	Sr	Ba	Pb									upper limit	0	0	0	0	0	0	0	0	0	0	0	0	0	0	0	0
300																																	col_out	0	0	0	0	0	0	0	0	0	0	0	0	0	0	0	0
600																																	col_in	0	0	0	0	0	0	0	0	0	0	0	0	0	0	0	0
1800																																	dt/dc	INF	INF	INF	INF	INF	INF	INF	INF	INF	INF	INF	INF	INF	INF	INF	INF
																																	t confident	0	0	0	0	0	0	0	0	0	0	0	0	0	0	0	0
MEAN
300																																		C	O	Cl	Br	Rh	Na	Mg	Al	Si	P	S	K	Ca	Ti	Cr	Mn
600																																	a (exponent)
1800																																	b (constant in RSD)
																																	Rsquared
Coefficient of variation (RSD)																																	a-1 (exponent of derivative)
300																																	ab (constant of derivative in RSD/sec)
600																																	t_minimal (time threshold is reached in sec)
1800																																	RSD at t_minimal
ARTAX deconvolution				Same spot measurements
MEAN RSD's (ARTAX)
Time (s)	C	O	Cl	Br	Rh	Na	Mg	Al	Si	P	S	K	Ca	Ti	Cr	Mn	Fe	Ni	Cu	Zn	Rb	Sr	Ba	Pb									LLD	C	O	Cl	Br	Rh	Na	Mg	Al	Si	P	S	K	Ca	Ti	Cr	Mn
3																																	t before	-INF	-INF	-INF	-INF	-INF	-INF	-INF	-INF	-INF	-INF	-INF	-INF	-INF	-INF	-INF	-INF
10																																	t after	INF	INF	INF	INF	INF	INF	INF	INF	INF	INF	INF	INF	INF	INF	INF	INF
30																																	D	0	0	0	0	0	0	0	0	0	0	0	0	0	0	0	0
60																																	Dt	0	0	0	0	0	0	0	0	0	0	0	0	0	0	0	0
120																																	t LLD	INF	INF	INF	INF	INF	INF	INF	INF	INF	INF	INF	INF	INF	INF	INF	INF
300
600																																	LLQ
1800																																	t before	-INF	-INF	-INF	-INF	-INF	-INF	-INF	-INF	-INF	-INF	-INF	-INF	-INF	-INF	-INF	-INF
																																	t after	INF	INF	INF	INF	INF	INF	INF	INF	INF	INF	INF	INF	INF	INF	INF	INF
MEAN signal/noise (ARTAX)																																	D	0	0	0	0	0	0	0	0	0	0	0	0	0	0	0	0
Time (s)	C	O	Cl	Br	Rh	Na	Mg	Al	Si	P	S	K	Ca	Ti	Cr	Mn	Fe	Ni	Cu	Zn	Rb	Sr	Ba	Pb									Dt	0	0	0	0	0	0	0	0	0	0	0	0	0	0	0	0
3																																	t LLQ	INF	INF	INF	INF	INF	INF	INF	INF	INF	INF	INF	INF	INF	INF	INF	INF
10
30
60
120
300
600
1800
ARTAX deconvolution				Different spot measurements
MEAN RSD's (ARTAX)
Time (s)	C	O	Cl	Br	Rh	Na	Mg	Al	Si	P	S	K	Ca	Ti	Cr	Mn	Fe	Ni	Cu	Zn	Rb	Sr	Ba	Pb									LLD	C	O	Cl	Br	Rh	Na	Mg	Al	Si	P	S	K	Ca	Ti	Cr	Mn
3			0.218813	0.17983	4.11484	17.2767	0.0842304	0.85794	0.427866	0.187189	1.69711	2.5155	0.00255858	3.24035	7.23038	0.0324287	0.010592	0.0925039	10.6117	0.151204	9.18298	0.40133	-0.00214938	1.41179									t before	-INF	-INF	-INF	-INF	2	1	-INF	2	2	-INF	2	1	-INF	1	1	-INF
10			0.117981	0.100855	1.98867	32.2276	0.0474956	0.377435	0.341836	0.155753	1.59048	0.224168	0.00140206	4.66623	18.112	0.0177148	0.00579523	0.0462113	19.7245	0.0846732	30.6276	0.246	0.834854	1.63336									t after	INF	INF	1	1	6	8	1	3	3	1	3	2	1	INF	INF	1
30			0.0726038	0.057383	2.69956	54.1	0.0292013	0.236944	0.212689	0.110091	0.327834	0.123985	0.000859398	5.28557	27.5257	0.0108038	0.00355158	0.0275187	30.0997	0.0501804	30.6878	0.144012	0.535145	-0.24039									D	0	0	0	0	-1.78753	-16.9573	0	-0.14049	-0.129146	0	-1.26265	-2.29134	0	0	0	0
60			0.0479104	0.0374372	4.10089	69.8724	0.0193203	0.136899	0.129561	0.0687717	0.221592	0.0807586	0.000571908	9.40371	22.8367	0.00716579	0.00236087	0.0184573	0.647183	0.0327482	3.65117	0.0893129	0.265927	1.05969									Dt	0	0	0	0	290	1797	0	20	20	0	20	7	0	0	0	0
120			0.0348038	0.0255387	6.08684	105.282	0.0136628	0.0997166	0.0909777	0.0468078	0.147934	0.0557998	0.000404156	15.4339	26.3258	0.00504378	0.00166498	0.0127723	10.2543	0.0224122	12.8847	0.0612083	0.205809	0.596994									t LLD	INF	INF	0	0	279.095	1798.87	0	16.7528	11.8329	0	29.9657	9.67669	0	INF	INF	0
300			0.0235367	0.0164982	0.201144	97.5939	0.00864934	0.0586028	0.0552013	0.0299494	0.0962834	0.0337014	0.000255946	27.9413	52.9891	0.00319169	0.00105578	0.00804841	0.151409	0.0139489	0.949514	0.0369068	0.112004	0.38187
600			0.0163439	0.0112849	0.156438	40.7717	0.00610028	0.0407117	0.0383915	0.0207475	0.0654721	0.0236456	0.000180963	21.9887	74.8852	0.00225165	0.000745981	0.00562157	0.101351	0.00978846	0.713822	0.0255426	0.073604	0.231233									LLQ
1800			0.00978848	0.00657077	0.0763016	0.319376	0.00351721	0.0230592	0.0217159	0.0119413	0.036654	0.0135283	0.000104636	58.1266	114.826	0.00130048	0.000431583	0.00325674	0.0489429	0.00559454	0.370936	0.0142921	0.0408842	0.124054									t before	-INF	-INF	2	2	7	8	-INF	4	4	3	5	3	-INF	1	1	-INF
																																	t after	INF	INF	3	3	8	INF	1	5	5	4	6	4	1	INF	INF	1
MEAN signal/noise (ARTAX)																																	D	0	0	-0.0453775	-0.0434716	-0.080136	0	0	-0.0371823	-0.0385838	-0.0413193	-0.051651	-0.043226	0	0	0	0
Time (s)	C	O	Cl	Br	Rh	Na	Mg	Al	Si	P	S	K	Ca	Ti	Cr	Mn	Fe	Ni	Cu	Zn	Rb	Sr	Ba	Pb									Dt	0	0	20	20	1200	0	0	60	60	30	180	30	0	0	0	0
3			1.58576	1.14192	1.06379	1.00805	3.03028	1.2922	1.63026	2.44194	1.31533	1.14672	170.341	1.20888	1.1142	5.48206	22.2914	1.61571	1.02649	1.26565	1.0099	1.06796	1.26629	1.06371									t LLQ	INF	INF	17.9252	10.3932	1445.13	INF	0	119.543	105.97	37.3266	287.048	46.6459	0	INF	INF	0
10			1.55935	1.13657	1.03444	1.00466	2.88115	1.20611	1.29574	1.57119	1.15092	1.19421	177.255	1.1407	1.07905	5.55426	23.0512	1.64809	1.02584	1.25854	1.00505	1.05946	1.18867	1.03746
30			1.54622	1.1441	1.03298	1.0007	2.86288	1.1993	1.22436	1.41644	1.13393	1.20994	179.793	1.12577	1.07618	5.65071	23.3615	1.66745	1.02375	1.27161	1.00611	1.05777	1.17634	1.02686
60			1.54622	1.1441	1.03298	1.0007	2.86288	1.1993	1.22436	1.41644	1.13393	1.20994	179.793	1.12577	1.07618	5.65071	23.3615	1.66745	1.02375	1.27161	1.00611	1.05777	1.17634	1.02686
120			1.53555	1.15179	1.03559	1.00059	2.87223	1.20714	1.23461	1.44927	1.12785	1.21868	182.865	1.12381	1.08942	5.75589	24.0266	1.6841	1.03363	1.2833	1.00699	1.06379	1.19534	1.03425
300			1.50022	1.14912	1.05568	1.00422	2.87564	1.22254	1.24647	1.44345	1.12227	1.22988	183.612	1.12798	1.0862	5.7791	24.0468	1.68878	1.04051	1.2883	1.0075	1.0669	1.20738	1.03546
600			1.51205	1.1538	1.05078	1.00963	2.88972	1.22844	1.25228	1.45389	1.12596	1.23201	183.953	1.13239	1.08661	5.81321	24.1818	1.69661	1.04219	1.29076	1.00833	1.06805	1.21634	1.0378
1800			1.49278	1.1529	1.05892	1.01716	2.89862	1.23224	1.25711	1.45718	1.12936	1.23472	184.438	1.12963	1.0879	5.83426	24.238	1.69709	1.04564	1.29341	1.00951	1.07028	1.22502	1.04
ARTAX deconvolution				pXRF measurements
MEAN RSD's (ARTAX)
Time (s)	C	O	Cl	Br	Rh	Na	Mg	Al	Si	P	S	K	Ca	Ti	Cr	Mn	Fe	Ni	Cu	Zn	Rb	Sr	Ba	Pb									LLD	C	O	Cl	Br	Rh	Na	Mg	Al	Si	P	S	K	Ca	Ti	Cr	Mn
3			9.51462	0.262828	1.63823	19.0949	3.28829	1.40496	1.58082	0.946589	3.69414	3.9511	0.00931058	4.49561	2.0207	0.0953367	0.0281311	0.492411	0.367624	0.124942	1.83629	0.220337	1.64276	3.86389									t before	-INF	-INF	1	-INF	6	1	3	3	1	6	1	6	-INF	7	7	-INF
10			21.8103	0.163466	1.88802	34.3315	2.74004	2.20469	3.08391	0.602967	6.44228	7.45067	0.00560519	5.13025	2.36958	0.0570327	0.0171444	1.15308	0.207787	0.0787056	1.03475	0.142828	2.09603	3.51633									t after	INF	INF	INF	1	INF	INF	INF	INF	INF	INF	INF	INF	1	INF	INF	1
30			29.4687	0.103972	-0.640187	61.2909	1.0936	1.13198	2.85979	-0.124557	9.9905	5.41508	0.00323327	4.68573	0.857659	0.0335277	0.00991565	0.735664	0.137183	0.0454273	3.99452	0.0903156	3.26278	7.53611									D	0	0	0	0	0	0	0	0	0	0	0	0	0	0	0	0
45			43.641	0.0878726	1.42264	72.4027	1.60965	11.7288	5.89503	0.611396	15.5628	6.31826	0.00265966	4.981	0.610728	0.0275609	0.00816291	0.448234	0.113996	0.0384255	0.690366	0.074495	2.32464	8.00395									Dt	0	0	0	0	0	0	0	0	0	0	0	0	0	0	0	0
60			44.3601	0.0768366	4.05057	79.7547	3.75603	4.28727	1.67591	0.754674	13.9095	4.25908	0.00231357	2.08408	0.533164	0.0240143	0.00708488	0.407674	0.0993841	0.03328	0.571354	0.0670386	-1.86113	10.7782									t LLD	INF	INF	INF	0	INF	INF	INF	INF	INF	INF	INF	INF	0	INF	INF	0
90			68.8675	0.0629856	0.909208	94.3665	2.54784	11.6052	22.8321	0.547673	21.0306	0.958798	0.00191383	4.52302	0.529168	0.0198906	0.00586665	0.384739	0.0822115	0.0279831	0.521058	0.0556172	-2.00907	20.1636
120			70.8058	0.056903	1.06925	119.924	9.34229	12.1452	12.9826	0.55958	14.5959	13.2196	0.0016575	0.675207	0.398745	0.017221	0.00510155	0.300027	0.0715003	0.0240101	0.486663	0.0475516	1.05566	9.94464									LLQ
																																	t before	-INF	-INF	1	3	6	1	3	3	1	6	1	6	-INF	7	7	-INF
MEAN signal/noise (ARTAX)																																	t after	INF	INF	INF	4	INF	INF	INF	INF	INF	INF	INF	INF	1	INF	INF	1
Time (s)	C	O	Cl	Br	Rh	Na	Mg	Al	Si	P	S	K	Ca	Ti	Cr	Mn	Fe	Ni	Cu	Zn	Rb	Sr	Ba	Pb									D	0	0	0	-0.0160997	0	0	0	0	0	0	0	0	0	0	0	0
3			1.04435	1.34176	1.10623	1.00847	1.12315	1.14766	1.14625	1.24539	1.09874	1.09277	53.3623	1.12612	1.40261	5.18574	34.307	1.66191	2.0652	3.55946	1.08741	1.26026	1.22796	1.02374									Dt	0	0	0	15	0	0	0	0	0	0	0	0	0	0	0	0
10			1.01034	1.3162	1.04765	1.00331	1.086	1.07055	1.09117	1.13015	1.06167	1.036	49.4351	1.08741	1.15802	4.98719	29.3799	1.28246	1.81093	3.27053	1.05607	1.23235	1.11282	1.00861									t LLQ	INF	INF	INF	33.701	INF	INF	INF	INF	INF	INF	INF	INF	0	INF	INF	0
30			1.00252	1.27458	1.03603	1.00067	1.04717	1.04145	1.05292	1.06935	1.02544	1.03167	50.3115	1.06717	1.13163	4.76486	28.79	1.17315	1.66576	3.14042	1.03468	1.20747	1.03944	1.00073
45			1.0033	1.26347	1.02918	1.00154	1.03897	1.02177	1.033	1.05824	1.01901	1.02522	50.1331	1.05217	1.13043	4.77248	28.3126	1.17285	1.6466	3.05682	1.03222	1.20577	1.02495	1.00079
60			1.0025	1.26213	1.02898	1.00123	1.03306	1.02692	1.02666	1.05006	1.01912	1.02401	50.6473	1.06641	1.1135	4.74478	28.7239	1.15707	1.6397	3.07105	1.02956	1.19852	1.02749	1.00075
90			1.00075	1.26358	1.02684	1.00102	1.02257	1.01713	1.02093	1.04791	1.01422	1.02658	50.0508	1.05232	1.10535	4.6978	28.1568	1.13468	1.62967	3.00615	1.02694	1.19497	1.01983	1.00139
120			1.00049	1.24656	1.02341	1.00044	1.0227	1.01733	1.01757	1.03884	1.01303	1.02213	50.6678	1.05894	1.10767	4.7537	28.3212	1.1489	1.62539	3.04722	1.02449	1.20046	1.01388	1.00018
ARTAX deconvolution				maps																													LLD	C	O	Cl	Br	Rh	Na	Mg	Al	Si	P	S	K	Ca	Ti	Cr	Mn
																																	t before	-INF	-INF	-INF	-INF	-INF	-INF	-INF	-INF	-INF	-INF	-INF	-INF	-INF	-INF	-INF	-INF
MEAN RSD's (ARTAX)																																	t after	INF	INF	INF	INF	INF	INF	INF	INF	INF	INF	INF	INF	INF	INF	INF	INF
Time (s)	C	O	Cl	Br	Rh	Na	Mg	Al	Si	P	S	K	Ca	Ti	Cr	Mn	Fe	Ni	Cu	Zn	Rb	Sr	Ba	Pb									D	0	0	0	0	0	0	0	0	0	0	0	0	0	0	0	0
300																																	Dt	0	0	0	0	0	0	0	0	0	0	0	0	0	0	0	0
600																																	t LLD	INF	INF	INF	INF	INF	INF	INF	INF	INF	INF	INF	INF	INF	INF	INF	INF
1800
																																	LLQ
MEAN signal/noise (ARTAX)																																	t before	-INF	-INF	-INF	-INF	-INF	-INF	-INF	-INF	-INF	-INF	-INF	-INF	-INF	-INF	-INF	-INF
Time (s)	C	O	Cl	Br	Rh	Na	Mg	Al	Si	P	S	K	Ca	Ti	Cr	Mn	Fe	Ni	Cu	Zn	Rb	Sr	Ba	Pb									t after	INF	INF	INF	INF	INF	INF	INF	INF	INF	INF	INF	INF	INF	INF	INF	INF
300																																	D	0	0	0	0	0	0	0	0	0	0	0	0	0	0	0	0
600																																	Dt	0	0	0	0	0	0	0	0	0	0	0	0	0	0	0	0
1800																																	t LLQ	INF	INF	INF	INF	INF	INF	INF	INF	INF	INF	INF	INF	INF	INF	INF	INF
mol%	Average spot measurements					ESPRIT
STDEV
Time (s)	C	O	Cl	Br	Rh	Na	Mg	Al	Si	P	S	K	Ca	Ti	Cr	Mn	Fe	Ni	Cu	Zn	Rb	Sr	Ba	Pb
3	0.00028971	0.00112492	6.04934e-05	2.87187e-06	0	0	0.00355654	8.98908e-05	0.000263679	1.04145e-05	0.000110467	1.16914e-05	0.00494471	4.8718e-05	1.59777e-06	1.14534e-05	0.000120445	2.19039e-06	7.2428e-07	4.54424e-06	0	1.87245e-06	3.17067e-06	6.87046e-06	0	0	0	0	0	0	0
10	0.000217024	0.000944965	5.66138e-05	2.97163e-06	0	0.000101598	0.00301438	0.000110614	0.000342872	8.88704e-06	7.46898e-05	1.2427e-05	0.00431539	3.32485e-05	1.60076e-06	1.18107e-05	0.000101248	2.46427e-06	1.28816e-06	3.6869e-06	0	2.15603e-06	4.06163e-06	5.79331e-06	0	0	0	0	0	0	0
30	0.000201336	0.00091492	4.28943e-05	2.6258e-06	0	0	0.00288903	7.4337e-05	0.000345549	4.34546e-06	5.23742e-05	9.92112e-06	0.00415981	3.29769e-05	1.72154e-06	1.21102e-05	9.69927e-05	2.37652e-06	1.36694e-06	3.93739e-06	3.91547e-08	1.15062e-06	4.81807e-06	4.91889e-06	0	0	0	0	0	0	0
60	0.000240709	0.000932813	4.39703e-05	2.72828e-06	0	0.000262656	0.00297985	5.14371e-05	0.000312802	3.24628e-06	3.39784e-05	1.0114e-05	0.00421131	2.85034e-05	1.52615e-06	1.22796e-05	9.80374e-05	2.5136e-06	1.64461e-06	3.699e-06	0	1.51057e-06	5.40244e-06	5.04469e-06	0	0	0	0	0	0	0
120	0.000237921	0.000954309	4.4765e-05	2.73083e-06	0	0.000135886	0.00300316	4.65558e-05	0.000278062	2.48507e-06	2.79069e-05	1.0202e-05	0.0042188	2.66983e-05	1.86469e-06	1.16959e-05	0.000106962	2.34084e-06	1.60613e-06	3.71051e-06	1.80957e-07	1.45226e-06	6.10427e-06	5.43649e-06	0	0	0	0	0	0	0
300	0.000216616	0.000919354	4.57298e-05	2.56212e-06	0	0.000405478	0.00296177	2.91955e-05	0.000267424	2.01674e-06	1.40612e-05	9.87904e-06	0.00421598	2.62024e-05	1.93866e-06	1.15373e-05	0.000100306	2.54111e-06	1.76455e-06	3.7823e-06	2.88775e-07	1.4408e-06	6.36164e-06	4.86891e-06	0	0	0	0	0	0	0
600	0.000221336	0.000944366	4.29212e-05	2.61557e-06	0	0.000430295	0.00293285	3.42087e-05	0.000276695	2.03277e-06	1.88075e-05	1.01806e-05	0.00415723	2.62319e-05	1.90085e-06	1.11916e-05	9.86921e-05	2.60238e-06	1.79425e-06	3.74748e-06	4.12706e-07	1.4234e-06	6.53219e-06	5.33324e-06	0	0	0	0	0	0	0
1800	0.000233074	0.000959492	4.18087e-05	2.48093e-06	0	0.000636943	0.00293509	2.98458e-05	0.000249482	2.23387e-06	1.79149e-05	1.04279e-05	0.00415049	2.51216e-05	2.00234e-06	1.13265e-05	9.88834e-05	2.59459e-06	1.82101e-06	3.70449e-06	3.94068e-07	1.39954e-06	6.70607e-06	5.09642e-06	0	0	0	0	0	0	0
MEAN
Time (s)																																		C	O	Cl	Br	Rh	Na	Mg	Al	Si	P	S	K	Ca	Ti	Cr	Mn
3	0.127747	0.514513	0.000789731	1.72123e-05	0	0	0.117504	0.000175848	0.00085986	5.46852e-05	0.000326669	2.46853e-05	0.232512	0.000198872	2.81094e-06	0.000575931	0.00460153	1.35935e-05	7.83746e-07	5.29047e-05	0	4.15354e-06	2.45079e-06	2.26218e-05	0	0	0	0	0	0	0		lower limit	0.127211	0.517838	0.000805075	3.04309e-05	0	0.000468818	0.129375	0.00142419	0.00360532	7.50386e-05	0.000306684	0.000102159	0.194715	0.000168016	9.23445e-07	0.00055552
10	0.127878	0.516933	0.000912678	2.74504e-05	0	7.46962e-05	0.12522	0.000558394	0.00229849	5.48287e-05	0.000240725	5.78437e-05	0.220221	0.000225316	2.60497e-06	0.000579793	0.00458388	1.71983e-05	1.27803e-06	5.66461e-05	0	1.2783e-05	7.14075e-06	3.62764e-05	0	0	0	0	0	0	0		upper limit	0.128144	0.521676	0.00097231	4.03547e-05	0	0.00301659	0.141115	0.00154357	0.00460325	8.39741e-05	0.000378344	0.00014387	0.211316	0.000268502	8.93281e-06	0.000600826
30	0.128216	0.518652	0.00093453	3.25663e-05	0	0	0.130758	0.000910895	0.00246814	5.24819e-05	0.000179587	8.40779e-05	0.212218	0.000203195	3.35312e-06	0.000580449	0.00454643	2.08165e-05	2.06417e-06	6.0995e-05	2.52019e-08	1.6763e-05	9.18586e-06	5.05493e-05	0	0	0	0	0	0	0		col_out	3	2	1	2	0	5	2	6	5	6	6	4	3	0	0	0
60	0.128057	0.519339	0.000940123	3.46118e-05	0	0.000395195	0.133066	0.00115575	0.00326083	6.15063e-05	0.000210777	9.47893e-05	0.207879	0.000219335	3.49831e-06	0.000578425	0.00452817	2.15578e-05	2.46687e-06	6.24884e-05	0	2.07936e-05	1.19591e-05	5.54535e-05	0	0	0	0	0	0	0		col_in	4	3	0	3	0	6	3	7	6	7	7	5	4	0	0	0
120	0.128034	0.519662	0.000929839	3.61397e-05	0	0.000168043	0.133762	0.00123166	0.00355053	6.8034e-05	0.000263875	0.000104157	0.206651	0.000218398	3.89208e-06	0.000581186	0.00454653	2.3444e-05	2.74741e-06	6.47808e-05	1.37256e-07	2.26085e-05	1.43864e-05	6.10003e-05	0	0	0	0	0	0	0		dt/dc	-188738	11638.3	835075	3.9094e+06	INF	414454	3611.6	5.66421e+06	731462	7.07186e+07	6.17926e+06	6.40527e+06	-6915	INF	INF	INF
300	0.127887	0.519647	0.000895174	3.44275e-05	0	0.000602348	0.133997	0.00137937	0.00379662	7.1285e-05	0.000268064	0.000115305	0.205774	0.000219941	4.28032e-06	0.000580617	0.00452597	2.57731e-05	3.77828e-06	6.61991e-05	2.85312e-07	2.4604e-05	1.54574e-05	6.51151e-05	0	0	0	0	0	0	0		t confident	43.7396	20.5246	15.8131	21.6521	0	244.658	25.0059	553.829	160.074	565.449	538.647	107.205	36.2327	0	0	0
600	0.127832	0.519853	0.000915688	3.62181e-05	0	0.000854043	0.134826	0.00143234	0.00398628	7.55272e-05	0.000316613	0.000118985	0.204223	0.000220944	4.55876e-06	0.000579963	0.00451616	2.71954e-05	3.95499e-06	6.66846e-05	5.93537e-07	2.55441e-05	1.77619e-05	6.72098e-05	0	0	0	0	0	0	0
1800	0.127678	0.519757	0.000888693	3.53928e-05	0	0.0017427	0.135245	0.00148388	0.00410428	7.95063e-05	0.000342514	0.000123015	0.203015	0.000218259	4.92813e-06	0.000578173	0.00448881	2.7314e-05	4.49169e-06	6.73017e-05	9.36764e-07	2.63786e-05	1.86216e-05	6.99468e-05	0	0	0	0	0	0	0
Coefficient of variation (RSD)
Time (s)	C	O	Cl	Br	Rh	Na	Mg	Al	Si	P	S	K	Ca	Ti	Cr	Mn	Fe	Ni	Cu	Zn	Rb	Sr	Ba	Pb										C	O	Cl	Br	Rh	Na	Mg	Al	Si	P	S	K	Ca	Ti	Cr	Mn
3	0.00226784	0.00218637	0.0765999	0.16685	0	0	0.0302674	0.511183	0.306653	0.190444	0.338162	0.473619	0.0212665	0.244972	0.568411	0.0198867	0.026175	0.161135	0.924126	0.0858948	0	0.450809	1.29374	0.303709									a (exponent)	-0.0194093	-0.0180473	-0.0648352	-0.119494			-0.0410871	-0.520378	-0.241661	-0.355164	-0.361521	-0.250768	-6.92632e-05	-0.103146	-0.0624976	-0.00699053
10	0.00169712	0.00182802	0.0620305	0.108255	0	1.36015	0.0240727	0.198094	0.149173	0.162087	0.310271	0.214837	0.0195958	0.147564	0.614501	0.0203705	0.0220878	0.143285	1.00793	0.0650865	0	0.168664	0.568795	0.159699									b (constant in RSD)	0.00196706	0.00200466	0.0695082	0.147281			0.0278305	0.582703	0.303569	0.27108	0.643573	0.390645	0.0203034	0.221404	0.633942	0.0207758
30	0.00157028	0.00176404	0.0458994	0.0806295	0	0	0.0220945	0.0816088	0.140004	0.0827993	0.291638	0.117999	0.0196016	0.162292	0.513416	0.0208635	0.0213338	0.114165	0.662222	0.0645527	1.55364	0.0686408	0.52451	0.0973088									Rsquared	0.143167	0.30862	0.5693	0.741003			0.612073	0.903	0.893848	0.902771	0.888652	0.77416	3.16946e-05	0.746977	0.805799	0.21939
60	0.0018797	0.00179615	0.0467707	0.078825	0	0.664625	0.0223938	0.0445053	0.0959272	0.0527797	0.161205	0.106699	0.0202584	0.129954	0.436253	0.0212293	0.0216506	0.116598	0.666679	0.059195	0	0.072646	0.451742	0.0909715									a-1 (exponent of derivative)	-1.01941	-1.01805	-1.06484	-1.11949			-1.04109	-1.52038	-1.24166	-1.35516	-1.36152	-1.25077	-1.00007	-1.10315	-1.0625	-1.00699
120	0.00185827	0.0018364	0.0481428	0.0755631	0	0.808643	0.0224514	0.0377991	0.0783156	0.0365269	0.105758	0.0979492	0.0204151	0.122246	0.479099	0.0201242	0.023526	0.0998484	0.584599	0.0572779	1.31839	0.0642353	0.424307	0.0891224									ab (constant of derivative in RSD/sec)	-3.81793e-05	-3.61786e-05	-0.00450658	-0.0175993			-0.00114347	-0.303226	-0.0733608	-0.096278	-0.232665	-0.097961	-1.40628e-06	-0.022837	-0.0396198	-0.000145234
300	0.0016938	0.00176919	0.0510848	0.0744207	0	0.673163	0.0221032	0.0211658	0.0704374	0.0282912	0.0524548	0.0856776	0.0204884	0.119134	0.452923	0.0198708	0.0221622	0.0985954	0.467024	0.0571352	1.01214	0.0585596	0.411559	0.0747739									t_minimal (time threshold is reached in sec)	0.388857	0.368365	35.7395	101.347			10.3863	195.014	203.127	159.074	297.011	246.249	0.0140669	137.437	278.676	1.44858
600	0.00173146	0.0018166	0.0468732	0.0722171	0	0.503833	0.0217529	0.0238831	0.0694119	0.0269145	0.0594022	0.0855619	0.0203564	0.118726	0.416965	0.0192971	0.0218531	0.0956921	0.453666	0.056197	0.695333	0.0557233	0.367765	0.0793521									RSD at t_minimal	0.00200346	0.00204112	0.0551236	0.0848134			0.0252789	0.0374755	0.0840545	0.0447888	0.0821561	0.098198	0.0203094	0.133245	0.445899	0.0207221
1800	0.00182549	0.00184604	0.0470452	0.0700971	0	0.365491	0.021702	0.0201134	0.0607856	0.0280968	0.0523041	0.0847692	0.0204442	0.1151	0.406309	0.0195902	0.0220289	0.0949912	0.405418	0.055043	0.42067	0.0530557	0.360124	0.0728614
ARTAX deconvolution				Average spot measurements
MEAN RSD's (ARTAX)
Time (s)	C	O	Cl	Br	Rh	Na	Mg	Al	Si	P	S	K	Ca	Ti	Cr	Mn	Fe	Ni	Cu	Zn	Rb	Sr	Ba	Pb									LLD	C	O	Cl	Br	Rh	Na	Mg	Al	Si	P	S	K	Ca	Ti	Cr	Mn
3			0.219746	0.177975	4.0459	17.0153	0.0843776	0.810958	0.423718	0.183985	1.65974	2.60513	0.00256146	3.07838	7.40379	0.0324103	0.0106041	0.0914049	12.0056	0.151228	11.0076	0.394333	0.207118	1.73647									t before	-INF	-INF	-INF	-INF	2	1	-INF	2	2	-INF	3	1	-INF	1	1	-INF
10			0.118189	0.0988624	0.856766	32.8171	0.0477228	0.374467	0.35416	0.155861	1.27236	0.222123	0.00140356	4.40172	18.0613	0.0177034	0.00580208	0.0458023	19.3946	0.0848376	28.5272	0.248188	0.730753	1.66277									t after	INF	INF	1	1	6	8	1	3	3	1	4	2	1	INF	INF	1
30			0.072478	0.0564567	2.50793	54.2167	0.0293369	0.239524	0.213214	0.110685	0.332264	0.123353	0.000860619	5.07619	28.4857	0.0108029	0.00355616	0.0273624	35.8217	0.0505262	33.035	0.145629	0.506024	-0.763917									D	0	0	0	0	-0.654627	-16.7028	0	-0.134943	-0.140947	0	-0.108347	-2.38301	0	0	0	0
60			0.0479834	0.0369979	3.79338	71.6943	0.0194161	0.138434	0.128773	0.0689147	0.223916	0.080353	0.000572678	9.42666	22.6303	0.00716632	0.00236364	0.0183191	0.64291	0.0328721	3.10612	0.088637	0.264824	1.04985									Dt	0	0	0	0	290	1797	0	20	20	0	30	7	0	0	0	0
120			0.0346869	0.0252322	6.37675	104.362	0.0137229	0.0999679	0.0903581	0.0465528	0.145481	0.0557478	0.000404753	14.9343	26.3558	0.00504672	0.00166736	0.0126867	13.2415	0.0224643	12.6915	0.0614559	0.203485	0.595926									t LLD	INF	INF	0	0	243.357	1798.12	0	16.5905	13.4283	0	30.6268	9.68312	0	INF	INF	0
300			0.0235129	0.0163318	0.202139	92.6798	0.00868624	0.0586716	0.0552641	0.0299046	0.0970508	0.0333936	0.000256293	26.75	53.6037	0.00319282	0.00105705	0.00799219	0.153803	0.0139526	0.98194	0.0367692	0.11285	0.363917
600			0.0163509	0.0111505	0.15771	42.3962	0.00612546	0.0407536	0.0384738	0.0208297	0.0659692	0.0234564	0.0001812	20.8389	76.5103	0.00225261	0.000746964	0.00558687	0.102075	0.00980725	0.725328	0.0255294	0.0731246	0.228431									LLQ
1800			0.00978355	0.00650513	0.0761365	0.312485	0.00353114	0.0230934	0.021744	0.0119758	0.0368289	0.0134375	0.000104765	56.2645	116.381	0.00130102	0.000432136	0.00323407	0.0489369	0.00560587	0.419491	0.0142675	0.0409045	0.123323									t before	-INF	-INF	2	1	7	8	-INF	4	4	3	5	3	-INF	1	1	-INF
																																	t after	INF	INF	3	2	8	INF	1	5	5	4	6	4	1	INF	INF	1
MEAN signal/noise (ARTAX)																																	D	0	0	-0.0457112	-0.079113	-0.0815734	0	0	-0.0384665	-0.038415	-0.0417703	-0.0484303	-0.0429997	0	0	0	0
Time (s)	C	O	Cl	Br	Rh	Na	Mg	Al	Si	P	S	K	Ca	Ti	Cr	Mn	Fe	Ni	Cu	Zn	Rb	Sr	Ba	Pb									Dt	0	0	20	7	1200	0	0	60	60	30	180	30	0	0	0	0
3			1.58449	1.14432	1.06571	1.00853	3.02535	1.30051	1.65769	2.49426	1.3273	1.14643	170.394	1.2183	1.11113	5.49242	22.3195	1.61914	1.02543	1.26406	1.00999	1.06919	1.26724	1.06603									t LLQ	INF	INF	17.9583	9.89934	1448.95	INF	0	119.95	104.94	37.6741	289.039	46.2927	0	INF	INF	0
10			1.55764	1.1401	1.03775	1.00325	2.85971	1.20904	1.29812	1.57796	1.15612	1.19555	177.135	1.13873	1.07649	5.55982	23.0799	1.65248	1.02684	1.25714	1.00491	1.05945	1.18168	1.03825
30			1.54637	1.14721	1.03223	1.0007	2.84521	1.19622	1.22371	1.41316	1.13196	1.21185	179.753	1.13212	1.07208	5.66023	23.4396	1.66977	1.02315	1.26842	1.00625	1.05714	1.17788	1.02611
60			1.54637	1.14721	1.03223	1.0007	2.84521	1.19622	1.22371	1.41316	1.13196	1.21185	179.753	1.13212	1.07208	5.66023	23.4396	1.66977	1.02315	1.26842	1.00625	1.05714	1.17788	1.02611
120			1.53802	1.15423	1.03538	1.00065	2.85671	1.20653	1.23585	1.45248	1.12997	1.2189	182.721	1.12826	1.08495	5.75868	24.0733	1.68738	1.03344	1.28104	1.00692	1.06372	1.19632	1.03462
300			1.5011	1.15142	1.05505	1.00435	2.86093	1.22199	1.24605	1.44405	1.1211	1.23209	183.456	1.13331	1.0809	5.7812	24.0985	1.69219	1.04043	1.28636	1.00761	1.0672	1.20735	1.03557
600			1.51174	1.15625	1.05034	1.00949	2.87493	1.22764	1.25163	1.45156	1.12494	1.23398	183.853	1.13798	1.08177	5.8174	24.2352	1.69977	1.04225	1.28871	1.00834	1.06816	1.21799	1.03779
1800			1.49298	1.15518	1.05861	1.01753	2.88408	1.23146	1.2565	1.45515	1.12865	1.2365	184.321	1.13639	1.08247	5.83668	24.2873	1.70086	1.04576	1.29117	1.00957	1.07046	1.22534	1.03997
STANDARD VALUES
mol%	Average spot measurements					ESPRIT
STDEV
Time (s)	C	O	Cl	Br	Rh	Na	Mg	Al	Si	P	S	K	Ca	Ti	Cr	Mn	Fe	Ni	Cu	Zn	Rb	Sr	Ba	Pb
3	0.000774583	0.00206364	0	0	0	0	0.0019755	5.45237e-05	7.48155e-05	5.4653e-06	3.82058e-05	2.53496e-05	0.0010532	3.81414e-06	1.48229e-06	4.47067e-05	0.000112354	3.73231e-06	0	6.54286e-06	0	0	2.58761e-06	3.51748e-06	0	0	0	0	0	0	0
10	0.000774583	0.00206364	0	0	0	0	0.0019755	5.45237e-05	7.48155e-05	5.4653e-06	3.82058e-05	2.53496e-05	0.0010532	3.81414e-06	1.48229e-06	4.47067e-05	0.000112354	3.73231e-06	0	6.54286e-06	0	0	2.58761e-06	3.51748e-06	0	0	0	0	0	0	0
30	0.000774583	0.00206364	0	0	0	0	0.0019755	5.45237e-05	7.48155e-05	5.4653e-06	3.82058e-05	2.53496e-05	0.0010532	3.81414e-06	1.48229e-06	4.47067e-05	0.000112354	3.73231e-06	0	6.54286e-06	0	0	2.58761e-06	3.51748e-06	0	0	0	0	0	0	0
60	0.000774583	0.00206364	0	0	0	0	0.0019755	5.45237e-05	7.48155e-05	5.4653e-06	3.82058e-05	2.53496e-05	0.0010532	3.81414e-06	1.48229e-06	4.47067e-05	0.000112354	3.73231e-06	0	6.54286e-06	0	0	2.58761e-06	3.51748e-06	0	0	0	0	0	0	0
120	0.000774583	0.00206364	0	0	0	0	0.0019755	5.45237e-05	7.48155e-05	5.4653e-06	3.82058e-05	2.53496e-05	0.0010532	3.81414e-06	1.48229e-06	4.47067e-05	0.000112354	3.73231e-06	0	6.54286e-06	0	0	2.58761e-06	3.51748e-06	0	0	0	0	0	0	0
300	0.000774583	0.00206364	0	0	0	0	0.0019755	5.45237e-05	7.48155e-05	5.4653e-06	3.82058e-05	2.53496e-05	0.0010532	3.81414e-06	1.48229e-06	4.47067e-05	0.000112354	3.73231e-06	0	6.54286e-06	0	0	2.58761e-06	3.51748e-06	0	0	0	0	0	0	0
600	0.000774583	0.00206364	0	0	0	0	0.0019755	5.45237e-05	7.48155e-05	5.4653e-06	3.82058e-05	2.53496e-05	0.0010532	3.81414e-06	1.48229e-06	4.47067e-05	0.000112354	3.73231e-06	0	6.54286e-06	0	0	2.58761e-06	3.51748e-06	0	0	0	0	0	0	0
1800	0.000774583	0.00206364	0	0	0	0	0.0019755	5.45237e-05	7.48155e-05	5.4653e-06	3.82058e-05	2.53496e-05	0.0010532	3.81414e-06	1.48229e-06	4.47067e-05	0.000112354	3.73231e-06	0	6.54286e-06	0	0	2.58761e-06	3.51748e-06	0	0	0	0	0	0	0
MEAN
Time (s)
3	0.156528	0.417019	0	0	0	0	0.155834	0.000668441	0.00150701	6.73675e-05	0.000192871	0.000262	0.263189	3.00856e-05	3.57669e-06	0.000764927	0.00380816	5.29671e-06	0	8.02862e-05	0	0	8.61819e-06	3.23999e-05	0	0	0	0	0	0	0
10	0.156528	0.417019	0	0	0	0	0.155834	0.000668441	0.00150701	6.73675e-05	0.000192871	0.000262	0.263189	3.00856e-05	3.57669e-06	0.000764927	0.00380816	5.29671e-06	0	8.02862e-05	0	0	8.61819e-06	3.23999e-05	0	0	0	0	0	0	0
30	0.156528	0.417019	0	0	0	0	0.155834	0.000668441	0.00150701	6.73675e-05	0.000192871	0.000262	0.263189	3.00856e-05	3.57669e-06	0.000764927	0.00380816	5.29671e-06	0	8.02862e-05	0	0	8.61819e-06	3.23999e-05	0	0	0	0	0	0	0
60	0.156528	0.417019	0	0	0	0	0.155834	0.000668441	0.00150701	6.73675e-05	0.000192871	0.000262	0.263189	3.00856e-05	3.57669e-06	0.000764927	0.00380816	5.29671e-06	0	8.02862e-05	0	0	8.61819e-06	3.23999e-05	0	0	0	0	0	0	0
120	0.156528	0.417019	0	0	0	0	0.155834	0.000668441	0.00150701	6.73675e-05	0.000192871	0.000262	0.263189	3.00856e-05	3.57669e-06	0.000764927	0.00380816	5.29671e-06	0	8.02862e-05	0	0	8.61819e-06	3.23999e-05	0	0	0	0	0	0	0
300	0.156528	0.417019	0	0	0	0	0.155834	0.000668441	0.00150701	6.73675e-05	0.000192871	0.000262	0.263189	3.00856e-05	3.57669e-06	0.000764927	0.00380816	5.29671e-06	0	8.02862e-05	0	0	8.61819e-06	3.23999e-05	0	0	0	0	0	0	0
600	0.156528	0.417019	0	0	0	0	0.155834	0.000668441	0.00150701	6.73675e-05	0.000192871	0.000262	0.263189	3.00856e-05	3.57669e-06	0.000764927	0.00380816	5.29671e-06	0	8.02862e-05	0	0	8.61819e-06	3.23999e-05	0	0	0	0	0	0	0
1800	0.156528	0.417019	0	0	0	0	0.155834	0.000668441	0.00150701	6.73675e-05	0.000192871	0.000262	0.263189	3.00856e-05	3.57669e-06	0.000764927	0.00380816	5.29671e-06	0	8.02862e-05	0	0	8.61819e-06	3.23999e-05	0	0	0	0	0	0	0
Coefficient of variation (RSD)
Time (s)	C	O	Cl	Br	Rh	Na	Mg	Al	Si	P	S	K	Ca	Ti	Cr	Mn	Fe	Ni	Cu	Zn	Rb	Sr	Ba	Pb
3	0.00494854	0.00494854	0	0	0	0	0.012677	0.0815685	0.049645	0.0811266	0.19809	0.0967541	0.0040017	0.126776	0.41443	0.0584457	0.0295035	0.704647	0	0.0814943	0	0	0.300249	0.108564
10	0.00494854	0.00494854	0	0	0	0	0.012677	0.0815685	0.049645	0.0811266	0.19809	0.0967541	0.0040017	0.126776	0.41443	0.0584457	0.0295035	0.704647	0	0.0814943	0	0	0.300249	0.108564
30	0.00494854	0.00494854	0	0	0	0	0.012677	0.0815685	0.049645	0.0811266	0.19809	0.0967541	0.0040017	0.126776	0.41443	0.0584457	0.0295035	0.704647	0	0.0814943	0	0	0.300249	0.108564
60	0.00494854	0.00494854	0	0	0	0	0.012677	0.0815685	0.049645	0.0811266	0.19809	0.0967541	0.0040017	0.126776	0.41443	0.0584457	0.0295035	0.704647	0	0.0814943	0	0	0.300249	0.108564
120	0.00494854	0.00494854	0	0	0	0	0.012677	0.0815685	0.049645	0.0811266	0.19809	0.0967541	0.0040017	0.126776	0.41443	0.0584457	0.0295035	0.704647	0	0.0814943	0	0	0.300249	0.108564
300	0.00494854	0.00494854	0	0	0	0	0.012677	0.0815685	0.049645	0.0811266	0.19809	0.0967541	0.0040017	0.126776	0.41443	0.0584457	0.0295035	0.704647	0	0.0814943	0	0	0.300249	0.108564
600	0.00494854	0.00494854	0	0	0	0	0.012677	0.0815685	0.049645	0.0811266	0.19809	0.0967541	0.0040017	0.126776	0.41443	0.0584457	0.0295035	0.704647	0	0.0814943	0	0	0.300249	0.108564
1800	0.00494854	0.00494854	0	0	0	0	0.012677	0.0815685	0.049645	0.0811266	0.19809	0.0967541	0.0040017	0.126776	0.41443	0.0584457	0.0295035	0.704647	0	0.0814943	0	0	0.300249	0.108564
ICP-MS VALUES
mol%	Average spot measurements					ESPRIT
STDEV
Time (s)	C	O	Cl	Br	Rh	Na23(MR)	Mg26(MR)	Al27(MR)	Si28(MR)	P31(MR)	S32(MR)	K39(HR)	Ca42(MR)	Ti47(MR)	Cr52(MR)	Mn55(MR)	Fe56(MR)	Ni60(MR)	Cu63(MR)	Zn66(MR)	Rb85(LR)	Sr86/88(LR)	Ba138(LR)	Pb208(LR)	Li7(LR)	B11(LR)	V51(MR)	Co59(MR)	As75(HR)	Cd114(LR)	Hg202(LR)
	0.000214747	0.000858191	0	0	0	0.000537205	0.00724712	8.29546e-05	0.000205361	2.53502e-05	0.000284553	9.76308e-05	0.0126765	9.57561e-06	5.61232e-06	1.50913e-05	0.000364189	4.42346e-06	1.76347e-06	5.74867e-05	6.26366e-07	3.10602e-07	1.03405e-06	1.46238e-06	0	0	0	0	0	0	0
MEAN
Time (s)
	0.127949	0.51132	0	0	0	0.000871653	0.123667	0.00036907	0.00831624	0.000116689	0.000272272	0.000239622	0.223017	1.28537e-05	7.10246e-06	0.000667032	0.00295236	6.8697e-06	1.55825e-05	0.000108312	8.95161e-07	2.88243e-05	8.48563e-06	3.03568e-05	3.60221e-06	1.49758e-05	1.21225e-06	2.29692e-06	4.13944e-07	7.03337e-07	2.96006e-07
Coefficient of variation (RSD)
Time (s)	C	O	Cl	Br	Rh	Na23(MR)	Mg26(MR)	Al27(MR)	Si28(MR)	P31(MR)	S32(MR)	K39(HR)	Ca42(MR)	Ti47(MR)	Cr52(MR)	Mn55(MR)	Fe56(MR)	Ni60(MR)	Cu63(MR)	Zn66(MR)	Rb85(LR)	Sr86/88(LR)	Ba138(LR)	Pb208(LR)	Li7(LR)	B11(LR)	V51(MR)	Co59(MR)	As75(HR)	Cd114(LR)	Hg202(LR)
	0.00167838	0.00167838	0	0	0	0.616306	0.0586021	0.224767	0.024694	0.217246	1.04511	0.407437	0.056841	0.744972	0.790193	0.0226245	0.123355	0.643909	0.11317	0.530749	0.699724	0.0107757	0.121859	0.0481731	0	0	0	0	0	0	0
[truncated: 8 more columns]
