# Supplementary material for: Trace element analyses of carbonates using portable and micro-X-ray fluorescence: performance and optimization of measurement parameters and strategies
Source: Royal Society of Chemistry journal article supplement (doi:10.1039/c6ja00361c), 2017-01-01
Supplement: c6ja00361c3.xlsx [file c6ja00361c3.xlsx]

## Sheet: Sheet1
	CRM393		CRM512		ECRM718
	µ (ug/g)	σ (ug/g)	µ (ug/g)	σ (ug/g)	µ (ug/g)	σ (ug/g)
Li	0.499891	0.0904473	4.65433	-	3.58864	-
B	7.67812	1.62215	1056.33	-	14.9194	-
B	7.46175	1.83296	935.384	-	13.5031	-
C	118827	106.104	128224	168.221	127467	213.938
O	474867	424.02	512418	672.258	509394	854.959
Na	565.687	432.588	1614.41	560.466	868.369	535.181
Mg	936.57	75.0759	125384	8801.55	123201	7219.82
Al	240.256	28.5802	167.593	26.8309	367.68	82.6422
Si	7636.71	1779.45	7696.54	485.076	8284.92	204.588
P	237.629	186.522	140.052	12.2451	116.25	25.2548
S	229.081	197.215	234.952	295.496	271.246	283.481
K	197.934	45.0182	115.703	105.138	238.719	97.263
As	0.0921873	0.0125185	0.392244	-	0.412385	-
Ca	394902	261.929	221053	14032	222177	12628.7
Ti	5.34453	3.32098	21.3504	24.6619	12.8052	9.53954
V	1.83519	0.0567685	1.62055	-	1.20768	-
Cr	3.80245	0.393674	1.63527	0.12808	7.07571	5.59118
Mn	90.7464	7.34388	29.2393	0.260309	664.519	15.0344
Fe	284.525	10.3413	197.305	10.3064	2941.24	362.817
Ni	6.55696	2.58199	3.18124	0.121431	6.84382	4.4068
Co	0.311079	0.0168287	0.0689607	-	2.28827	-
Cu	31.4602	11.9924	12.2135	2.25967	15.5238	1.75683
Zn	83.2388	18.645	47.6569	35.1245	107.904	57.2702
Rb	0.71725	0.363878	0.610627	0.527227	0.891789	0.624007
Sr	177.166	6.01757	249.431	10.4736	28.7158	0.309432
Cd	0.905625	0.0137868	0.147499	-	0.700688	-
Ba	74.6436	19.9775	6.79219	5.61605	8.45367	1.03015
Hg	0.288986	0.0161031	0.319932	-	0.294891	-
Pb	4.11033	0.181904	2.46325	1.21735	30.2424	1.45687
